# Supplementary material
Source: publisher figshare collection journal article supplement (https://gsapubs.figshare.com/ndownloader/files/23347337)
Supplement: Supplementary file 1 [file 23347337]

## Sheet: West Qinling
ages (Ma)	2σ error	system	source
West Qinling
242	2.9	LA-ICP-MS	Biji Luo et al. 2012.U–Pb zircon dating, geochemical and Sr–Nd–Hf isotopic compositions of Early Indosinian intrusive rocks in West Qinling, central China: petrogenesis and tectonic implications.Contributions to Mineralogy and Petrology. Volume 164, Issue 4, pp 551-569
242.3	2.3	LA-ICP-MS	Biji Luo et al. 2012.U–Pb zircon dating, geochemical and Sr–Nd–Hf isotopic compositions of Early Indosinian intrusive rocks in West Qinling, central China: petrogenesis and tectonic implications.Contributions to Mineralogy and Petrology. Volume 164, Issue 4, pp 551-569
244.4	2	LA-ICP-MS	Biji Luo et al. 2012.U–Pb zircon dating, geochemical and Sr–Nd–Hf isotopic compositions of Early Indosinian intrusive rocks in West Qinling, central China: petrogenesis and tectonic implications.Contributions to Mineralogy and Petrology. Volume 164, Issue 4, pp 551-569
241.2	2.5	LA-ICP-MS	Bi-Ji Luo et al., 2015,The Middle Triassic Meiwu Batholith, West Qinling, Central China: Implications for the Evolution of Compositional Diversity in a Composite Batholith
240.1	3.3	LA-ICP-MS	Bi-Ji Luo et al., 2015,The Middle Triassic Meiwu Batholith, West Qinling, Central China: Implications for the Evolution of Compositional Diversity in a Composite Batholith
242.4	2	LA-ICP-MS	Bi-Ji Luo et al., 2015,The Middle Triassic Meiwu Batholith, West Qinling, Central China: Implications for the Evolution of Compositional Diversity in a Composite Batholith
242.8	2.7	LA-ICP-MS	Bi-Ji Luo et al., 2015,The Middle Triassic Meiwu Batholith, West Qinling, Central China: Implications for the Evolution of Compositional Diversity in a Composite Batholith
239.6	1.8	LA-ICP-MS	Bi-Ji Luo et al., 2015,The Middle Triassic Meiwu Batholith, West Qinling, Central China: Implications for the Evolution of Compositional Diversity in a Composite Batholith
243.8	3.4	LA-ICP-MS	Bi-Ji Luo et al., 2015,The Middle Triassic Meiwu Batholith, West Qinling, Central China: Implications for the Evolution of Compositional Diversity in a Composite Batholith
244.3	2.4	LA-ICP-MS	Bi-Ji Luo et al., 2015,The Middle Triassic Meiwu Batholith, West Qinling, Central China: Implications for the Evolution of Compositional Diversity in a Composite Batholith
242.4	1.8	LA-ICP-MS	Biji Luo et al.2012. Petrogenesis and tectonic implications of the Early Indosinian Meiwu Pluton in West Qinling,central China.Earth Science Frontiers.19(3):199-213
243.4	2.7	LA-ICP-MS	Biji Luo et al.2012. Petrogenesis and tectonic implications of the Early Indosinian Meiwu Pluton in West Qinling,central China.Earth Science Frontiers.19(3):199-213
440	1.7	LA-ICP-MS	Chen Junlu et al., 2006. Zircon LA-ICPMS U-Pb age of mafic dykes in the area between the Qinling and the Qilian orogenic belts and its geological implications. Acta Petrologica Et Mineralogica. 25, 455-462.
442.8	1.1	LA-ICP-MS	Chen Junlu et al., 2006. Zircon LA-ICPMS U-Pb age of mafic dykes in the area between the Qinling and the Qilian orogenic belts and its geological implications. Acta Petrologica Et Mineralogica. 25, 455-462.
455	1.7		Chen, J.L., et al., 2007. LA-ICPMS zircon U–Pb dating of a quartz diorite pluton from Wangjiacha, the junction area between the Qinling and Qilian orogenic belts and its tectonic significance. Journal of Jilin University (Earth Science Edition) 37, 423–431.
233	1.5	LA-ICP-MS	Gao, T. 2011. The LA-ICP-MS Zircon U–Pb Dating, Geology and Geochemistry, Tectonic Setting of Several Important Intrusions From the North Part of the Western Stage of West Qinling and Their Relationship With Mineralization (Master thesis) Chang'an University, Xi'an, pp. 1–94 (in Chinese with English abstract).
433	1.7		He, S.P., et al., 2007. A LA-ICP-MS U–Pb chronological study of zircons from Hongtubao basic volcanic rocks and its geological significance in the east segment of North Qilian orogenic belt. Advances in Earth Science 22, 143–151.
234	26	Rb-Sr	Hongfei Zhang et al.2005. 秦岭花岗岩类地球化学和Pb-Sr-Nd同位素组成对基底性质及其构造属性的限制. Science in China (Series D).35, 914~926
223	7	LA-ICP-MS	Hongfei Zhang et al.2005. 秦岭花岗岩类地球化学和Pb-Sr-Nd同位素组成对基底性质及其构造属性的限制. Science in China (Series D).35, 914~926
229	7	SHRIMP	Hong-Fei Zhang et al.2006. U–Pb zircon SHRIMP ages, geochemical and Sr–Nd–Pb isotopic compositions of intrusive rocks from the Longshan–Tianshui area in the southeast corner of the Qilian orogenic belt, China: Constraints on petrogenesis and tectonic affinity.Journal of Asian Earth Sciences.Volume 27, Issue 6, 1 October 2006, Pages 751–764
434	10	SHRIMP	Hong-Fei Zhang et al.2006. U–Pb zircon SHRIMP ages, geochemical and Sr–Nd–Pb isotopic compositions of intrusive rocks from the Longshan–Tianshui area in the southeast corner of the Qilian orogenic belt, China: Constraints on petrogenesis and tectonic affinity.Journal of Asian Earth Sciences.Volume 27, Issue 6, 1 October 2006, Pages 751–764
441	10	SHRIMP	Hong-Fei Zhang et al.2006. U–Pb zircon SHRIMP ages, geochemical and Sr–Nd–Pb isotopic compositions of intrusive rocks from the Longshan–Tianshui area in the southeast corner of the Qilian orogenic belt, China: Constraints on petrogenesis and tectonic affinity.Journal of Asian Earth Sciences.Volume 27, Issue 6, 1 October 2006, Pages 751–764
220.7	7.3	Rb-Sr	Hu, Q.Q., et al. 2012. Ore-forming time of the Erlihe Pb–Zn deposit in the Fengxian–Taibai ore concentration area, Shaanxi Province: evidence from the Rb–Sr isotopic dating of phalerites. Acta Petrologica Sinica 28, 258–266.
250.1	2.2	LA-ICP-MS	Huiqing Wang et al.2010.LA-ICP-MS zircon U-Pb dating of the gabbro from Longwu Gorge ophiolite,Jianzha-Tongren area,Qinghai,China and its geological significance.GEOLOGICAL BULLETIN OF CHINA.29(1):86-92
13.3	0.2	LA-ICP-MS	J. P. Zheng et al.2010.Tectonic affinity of the west Qinling terrane (central China): North China or Yangtze.Tectonics.Volume 29, Issue 2,
13.8	0.2	LA-ICP-MS	J. P. Zheng et al.2010.Tectonic affinity of the west Qinling terrane (central China): North China or Yangtze.Tectonics.Volume 29, Issue 2,
14.2	0.2	LA-ICP-MS	J. P. Zheng et al.2010.Tectonic affinity of the west Qinling terrane (central China): North China or Yangtze.Tectonics.Volume 29, Issue 2,
230	3	LA-ICP-MS	J. P. Zheng et al.2010.Tectonic affinity of the west Qinling terrane (central China): North China or Yangtze.Tectonics.Volume 29, Issue 2,
321	4	LA-ICP-MS	J. P. Zheng et al.2010.Tectonic affinity of the west Qinling terrane (central China): North China or Yangtze.Tectonics.Volume 29, Issue 2,
662	8	LA-ICP-MS	J. P. Zheng et al.2010.Tectonic affinity of the west Qinling terrane (central China): North China or Yangtze.Tectonics.Volume 29, Issue 2,
868	10	LA-ICP-MS	J. P. Zheng et al.2010.Tectonic affinity of the west Qinling terrane (central China): North China or Yangtze.Tectonics.Volume 29, Issue 2,
2660	19	LA-ICP-MS	J. P. Zheng et al.2010.Tectonic affinity of the west Qinling terrane (central China): North China or Yangtze.Tectonics.Volume 29, Issue 2,
212	4.7	LA-ICP-MS	Jiangfeng Qin et al., 2009, Geochemical evidence for origin of magma mixing for the Triassic monzonitic granite and its enclaves at Mishuling in the Qinling orogen (central China)
212.9	2.6	LA-ICP-MS	Jiangfeng Qin et al., 2009, Geochemical evidence for origin of magma mixing for the Triassic monzonitic granite and its enclaves at Mishuling in the Qinling orogen (central China)
247.6	1.3	LA-ICP-MS	Jin, X. Y., et al., 2016. Magmatic-hydrothermal origin of the early Triassic Laodou lode gold deposit in the Xiahe-Hezuo district, West Qinling orogen, China: implications for gold metallogeny. Mineralium Deposita. doi:10.1007/s00126-016-0710-8
249.1	1.6	Ar-Ar	Jin, X. Y., et al., 2016. Magmatic-hydrothermal origin of the early Triassic Laodou lode gold deposit in the Xiahe-Hezuo district, West Qinling orogen, China: implications for gold metallogeny. Mineralium Deposita. doi:10.1007/s00126-016-0710-8
249	1.5	Ar-Ar	Jin, X. Y., et al., 2016. Magmatic-hydrothermal origin of the early Triassic Laodou lode gold deposit in the Xiahe-Hezuo district, West Qinling orogen, China: implications for gold metallogeny. Mineralium Deposita. doi:10.1007/s00126-016-0710-8
216.2	1.7	LA-ICP-MS	Laimin Zhu et al., 2011. Zircon U–Pb ages and geochemistry of the Wenquan Mo-bearing granitoids in West Qinling, China: constraints on the geodynamic setting for the newly discovered Wenquan Mo deposit. Ore Geology Reviews 39, 46–62.
217.2	2	LA-ICP-MS	Laimin Zhu et al., 2011. Zircon U–Pb ages and geochemistry of the Wenquan Mo-bearing granitoids in West Qinling, China: constraints on the geodynamic setting for the newly discovered Wenquan Mo deposit. Ore Geology Reviews 39, 46–62.
231.6	1.5	LA-ICP-MS	Laimin Zhu et al.2013.Geochronology, petrogenesis and tectonic implications of the Zhongchuan granitic pluton in the Western Qinling metallogenic belt, China.Geological Journal.Volume 48, Issue 4, pages 310–334
232.6	1	LA-ICP-MS	Laimin Zhu et al.2013.Geochronology, petrogenesis and tectonic implications of the Zhongchuan granitic pluton in the Western Qinling metallogenic belt, China.Geological Journal.Volume 48, Issue 4, pages 310–334
235.8	2.3	LA-ICP-MS	Laimin Zhu et al.2013.Geochronology, petrogenesis and tectonic implications of the Zhongchuan granitic pluton in the Western Qinling metallogenic belt, China.Geological Journal.Volume 48, Issue 4, pages 310–334
236.6	1.3	LA-ICP-MS	Laimin Zhu et al.2013.Geochronology, petrogenesis and tectonic implications of the Zhongchuan granitic pluton in the Western Qinling metallogenic belt, China.Geological Journal.Volume 48, Issue 4, pages 310–334
242	0.8	LA-ICP-MS	Laimin Zhu, et al., 2010. Zircon U–Pb dating and geochemical study of the Xianggou granite in the Ma’anqiao gold deposit and its relationship with gold mineralization. Science China-Earth Sciences 53, 220–240.
457	3		Li, N., et al., 2008. Molybdenite Re–Os isotope age of the Dahu Au–Mo deposit, Xiaoqinling and the indosinian mineralization. Acta Petrologica Sinica 24, 810–816.
534	9		Li, N., et al., 2008. Molybdenite Re–Os isotope age of the Dahu Au–Mo deposit, Xiaoqinling and the indosinian mineralization. Acta Petrologica Sinica 24, 810–816.
517	8		Li, N., et al., 2008. Molybdenite Re–Os isotope age of the Dahu Au–Mo deposit, Xiaoqinling and the indosinian mineralization. Acta Petrologica Sinica 24, 810–816.
447	8		Li, N., et al., 2008. Molybdenite Re–Os isotope age of the Dahu Au–Mo deposit, Xiaoqinling and the indosinian mineralization. Acta Petrologica Sinica 24, 810–816.
448	8		Li, N., et al., 2008. Molybdenite Re–Os isotope age of the Dahu Au–Mo deposit, Xiaoqinling and the indosinian mineralization. Acta Petrologica Sinica 24, 810–816.
430	15		Li, Y.J., et al., 2005. The disintegration of granite bodies in the Dangchuan area of Western Qinling: evidence from the isotopic dating ages. Bulletin of Mineralogy Petrology and Geochemistry 24, 114–120.
241.6	3.9	LA-ICP-MS	Lin Li et al. 2014. Late Permian–early Middle Triassic back-arc basin development in West Qinling, China. Journal of Asian Earth Sciences. Volume 87, Issues 15, Pages 116–129
242.3	3.8	LA-ICP-MS	Lin Li et al. 2014. Late Permian–early Middle Triassic back-arc basin development in West Qinling, China. Journal of Asian Earth Sciences. Volume 87, Issues 15, Pages 116–129
240.8	3.3	LA-ICP-MS	Lin Li et al. 2014. Late Permian–early Middle Triassic back-arc basin development in West Qinling, China. Journal of Asian Earth Sciences. Volume 87, Issues 15, Pages 116–129
241.5	3.5	LA-ICP-MS	Lin Li et al. 2014. Late Permian–early Middle Triassic back-arc basin development in West Qinling, China. Journal of Asian Earth Sciences. Volume 87, Issues 15, Pages 116–129
234.9	5.7	LA-ICP-MS	Lin Li et al. 2014. Late Permian–early Middle Triassic back-arc basin development in West Qinling, China. Journal of Asian Earth Sciences. Volume 87, Issues 15, Pages 116–129
434.6	1.5	LA-ICP-MS	Pei Xianzhi et al., 2007. 西秦岭天水地区百花基性岩浆杂岩的LA-ICP-MS锆石U-Pb 年龄及地球化学特征. Science in China(Series D）. 37, 224-234
499	1.8	LA-ICP-MS	Pei, X.Z., et al., 2005. Zircon U–Pb ages of the Guanzizhen ntermadiate-basic igneous complex in Tianshuiarea, West Qinling, and their geological siginificance. Geological Bulletin of China 24, 23–29.
507	3	LA-ICP-MS	Pei, X.Z., et al., 2005. Zircon U–Pb ages of the Guanzizhen ntermadiate-basic igneous complex in Tianshuiarea, West Qinling, and their geological siginificance. Geological Bulletin of China 24, 23–29.
449	3.1	LA-ICP-MS	Pei, X.Z., et al., 2007. Zircon LA-ICP-MS U–Pb dating of the Gabbro from the Baihua Igneous Complex in Tianshui Area, Eastern Gansu, and its geological significance. Advances in Earth Science 22, 818–827.
243.9	0.6	LA-ICP-MS	Ping Wei et al.2013.Geochemistry,chronology and geological significance of the granitoids in Xiahe,West Qinling.Acta Petrologica Sinica.29(11): 3981-3992
248.1	1.4	LA-ICP-MS	Ping Wei et al.2013.Geochemistry,chronology and geological significance of the granitoids in Xiahe,West Qinling.Acta Petrologica Sinica.29(11): 3981-3992
213	3	LA-ICP-MS	Qin. J. F., et al., 2009. Geochemical evidence for origin of magma mixing for the Triassic monzonitic granite and its enclaves at Mishuling in the Qinling orogen (central China). Lithos 112, 259–276.
226.6	6.2	LA-ICP-MS	Qiu, K. F., et al., 2016. Geologic and geochemical insights into the formation of the Taiyangshan porphyry copper–molybdenum deposit, Western Qinling Orogenic Belt, China. Gondwana Research. 35: 40-58.
218	6.1	LA-ICP-MS	Qiu, K. F., et al., 2016. Geologic and geochemical insights into the formation of the Taiyangshan porphyry copper–molybdenum deposit, Western Qinling Orogenic Belt, China. Gondwana Research. 35: 40-58.
215	5.8	LA-ICP-MS	Qiu, K. F., et al., 2016. Geologic and geochemical insights into the formation of the Taiyangshan porphyry copper–molybdenum deposit, Western Qinling Orogenic Belt, China. Gondwana Research. 35: 40-58.
200.7	5.1	LA-ICP-MS	Qiu, K. F., et al., 2016. Geologic and geochemical insights into the formation of the Taiyangshan porphyry copper–molybdenum deposit, Western Qinling Orogenic Belt, China. Gondwana Research. 35: 40-58.
208.5	1.3	LA-ICP-MS	Qiu, K. F., et al., 2016. Geologic and geochemical insights into the formation of the Taiyangshan porphyry copper–molybdenum deposit, Western Qinling Orogenic Belt, China. Gondwana Research. 35: 40-58.
247	2.2	LA-ICP-MS	Qiu, K. F., et al., 2016. Geologic and geochemical insights into the formation of the Taiyangshan porphyry copper–molybdenum deposit, Western Qinling Orogenic Belt, China. Gondwana Research. 35: 40-58.
938	4	LA-ICP-MS	Sanping Ding et al.2006. LA-ICP-MS zircon U-Pb dating of the Xinyang Neoproterozoic granitoid gneisses in the Tianshui area, western Qinling, and its geological significance.GEOLOGY IN CHINA.2006,(6):1217-1225
981	5	LA-ICP-MS	Sanping Ding et al.2006. LA-ICP-MS zircon U-Pb dating of the Xinyang Neoproterozoic granitoid gneisses in the Tianshui area, western Qinling, and its geological significance.GEOLOGY IN CHINA.2006,(6):1217-1225
433	5	LA-ICP-MS	Shengyao Yu et al.,2014, Paleozoic HP granulite-facies metamorphism and anatexis in the Dulan area of the North Qaidam UHP terrane, western China: Constraints from petrology, zircon U–Pb and amphibole Ar–Ar geochronology
438	4	LA-ICP-MS	Shengyao Yu et al.,2014, Paleozoic HP granulite-facies metamorphism and anatexis in the Dulan area of the North Qaidam UHP terrane, western China: Constraints from petrology, zircon U–Pb and amphibole Ar–Ar geochronology
264	1.4	LA-ICP-MS	Sun Xiaopan et al., 2013. Geochemical Characteristics and Chronology of the Jiangligou Granitic Pluton in West Qinling and Their Geological Significance. Acta Geologica Sinica . 87, 330-342.
450	1.8		Wang, H.L., et al., 2006. LA-ICPMS dating of zircon U–Pb and tectonic significance of Honghuapu subduction-related intrusions in the west segment of Northern Qinling Mountains. Geoscience 20, 536–544.
414	1.9		Wang, H.L., et al., 2009. Dating and geochemical characteristics of the Yanwan Paleozoic collisional intrusion in the west segment of Northern Qinling Mts. Acta Geologica Sinica 83, 353–364.
220	2	LA-ICP-MS	Wang, J., et al., 2008. Petrogenesis of granites from Dangchuan area inWest Qinling Orogenic belt and its tectonic implication. Earth Science—Journal of China University of Geoscience 33, 474–486 (in Chinese with English abstract).
434	10		Wang, J., et al., 2008. Petrogenesis of granites from Dangchuan area in West Qinling orogenic belt and its tectonic implication. Earth Science (Journal of China University of Geosciences) 33, 474–486.
238	4	SHRIMP	Weijun Jin et al.2005. SHRIMP dating of adakites in western Qinling and their implications.ACTA PETROLOGICA SINICA.21(3): 959-966
245	6	SHRIMP	Weijun Jin et al.2005. SHRIMP dating of adakites in western Qinling and their implications.ACTA PETROLOGICA SINICA.21(3): 959-966
399	7		Wen, Z.L., et al., 2008. Geologic and geochemical features of Devonian granites in Dangchuan area, Western Qinling, and its tectonic significance. Geological Review 54, 827–836.
375	23		Wen, Z.L., et al., 2008. Geologic and geochemical features of Devonian granites in Dangchuan area, Western Qinling, and its tectonic significance. Geological Review 54, 827–836.
375	6		Wen, Z.L., et al., 2008. Geologic and geochemical features of Devonian granites in Dangchuan area, Western Qinling, and its tectonic significance. Geological Review 54, 827–836.
391	21		Wen, Z.L., et al., 2008. Geologic and geochemical features of Devonian granites in Dangchuan area, Western Qinling, and its tectonic significance. Geological Review 54, 827–836.
242.1	1.2	LA-ICP-MS	Xianqing Guo et al.2011. Geological characteristics and associated magmatic ages of the Xiekeng skarn-type Cu-Au deposit in the West Qinling terrane.Acta Petrologica Sinica27(12): 3811-3822
243.8	1	LA-ICP-MS	Xianqing Guo et al.2011. Geological characteristics and associated magmatic ages of the Xiekeng skarn-type Cu-Au deposit in the West Qinling terrane.Acta Petrologica Sinica27(12): 3811-3822
452.7	3.6	LA-ICP-MS	Xianqing Guo et al.2011. Geological characteristics and associated magmatic ages of the Xiekeng skarn-type Cu-Au deposit in the West Qinling terrane.Acta Petrologica Sinica27(12): 3811-3822
234	0.6	LA-ICP-MS	Xianqing Guo et al.2012. Middle Triassic arc magmatism along the northeastern margin of the Tibet: U–Pb and Lu–Hf zircon characterization of the Gangcha complex in the West Qinling terrane, central China.Journal of the Geological Society, London, Vol. 169, 2012, pp. 327 –336.
242.1	1.2	LA-ICP-MS	Xianqing Guo et al.2012. Middle Triassic arc magmatism along the northeastern margin of the Tibet: U–Pb and Lu–Hf zircon characterization of the Gangcha complex in the West Qinling terrane, central China.Journal of the Geological Society, London, Vol. 169, 2012, pp. 327 –336.
243.8	1	LA-ICP-MS	Xianqing Guo et al.2012. Middle Triassic arc magmatism along the northeastern margin of the Tibet: U–Pb and Lu–Hf zircon characterization of the Gangcha complex in the West Qinling terrane, central China.Journal of the Geological Society, London, Vol. 169, 2012, pp. 327 –336.
419.3	3.3	LA-ICP-MS	Xianqing Guo et al.2012. Middle Triassic arc magmatism along the northeastern margin of the Tibet: U–Pb and Lu–Hf zircon characterization of the Gangcha complex in the West Qinling terrane, central China.Journal of the Geological Society, London, Vol. 169, 2012, pp. 327 –336.
452.7	3.6	LA-ICP-MS	Xianqing Guo et al.2012. Middle Triassic arc magmatism along the northeastern margin of the Tibet: U–Pb and Lu–Hf zircon characterization of the Gangcha complex in the West Qinling terrane, central China.Journal of the Geological Society, London, Vol. 169, 2012, pp. 327 –336.
777	7	LA-ICP-MS	Xianqing Guo et al.2012. Middle Triassic arc magmatism along the northeastern margin of the Tibet: U–Pb and Lu–Hf zircon characterization of the Gangcha complex in the West Qinling terrane, central China.Journal of the Geological Society, London, Vol. 169, 2012, pp. 327 –336.
434.6	1.5	LA-ICP-MS	Xianzhi Pei et al. 2007. The LA-ICP-MS zircons U-Pb ages and geochemistry of the Baihua basic igneous complexes in Tianshui area of West Qinling. Science in China Series D: Earth Sciences. 50(2): 264–276
507.5	3	TIMS	Xianzhi Pei et al.2005.Geochemical characteristics and zircon U-Pb ages of island-arc basic igneous complexes in the Tianshui area, West Qinling.GEOLOGY IN CHINA.2005,(4):529-540
222.5	2.8	LA-ICP-MS	Xiaofeng Cao et al. 2011. LA–ICP–MS U–Pb zircon geochronology, geochemistry and kinetics of the Wenquan ore-bearing granites from West Qinling, China.Ore Geology Reviews.Volume 43, Issue 1, Pages 120–131
224.6	2.5	LA-ICP-MS	Xiaofeng Cao et al. 2011. LA–ICP–MS U–Pb zircon geochronology, geochemistry and kinetics of the Wenquan ore-bearing granites from West Qinling, China.Ore Geology Reviews.Volume 43, Issue 1, Pages 120–131
424	3	LA-ICP-MS	Xiaohong, Mao, et al., 2017. Early Paleozoic granulite-facies metamorphism and anatexis in the northern West Qinling orogen: Monazite and zircon U-Pb geochronological constraints. Science China Earth Science. 60(5):943–957.
433	4	LA-ICP-MS	Xiaohong, Mao, et al., 2017. Early Paleozoic granulite-facies metamorphism and anatexis in the northern West Qinling orogen: Monazite and zircon U-Pb geochronological constraints. Science China Earth Science. 60(5):943–957.
426	2	LA-ICP-MS	Xiaohong, Mao, et al., 2017. Early Paleozoic granulite-facies metamorphism and anatexis in the northern West Qinling orogen: Monazite and zircon U-Pb geochronological constraints. Science China Earth Science. 60(5):943–957.
430	3	LA-ICP-MS	Xiaohong, Mao, et al., 2017. Early Paleozoic granulite-facies metamorphism and anatexis in the northern West Qinling orogen: Monazite and zircon U-Pb geochronological constraints. Science China Earth Science. 60(5):943–957.
105.8	0.9	LA-ICP-MS	Xiaowei Li et al. 2013. Geochronological, geochemical and Sr–Nd–Hf isotopic constraints on the origin of the Cretaceous intraplate volcanism in West Qinling, Central China: Implications for asthenosphere–lithosphere interaction. Lithos. 177: 381-401.
234	3	Ar-Ar	Xiaowei Li et al. 2013. Petrology and geochemistry of the early Mesozoic pyroxene andesites in the Maixiu Area, West Qinling, China: Products of subduction or syn-collision? Lithos. 172-173: 158–174.
245.7	1.3	LA-ICP-MS	Xiaowei Li et al., 2014, Petrology, geochemistry and geochronology of the magmatic suite from the Jianzha Complex, central China: Petrogenesis and geodynamic implications
241.8	1.3	LA-ICP-MS	Xiaowei Li et al., 2014, Petrology, geochemistry and geochronology of the magmatic suite from the Jianzha Complex, central China: Petrogenesis and geodynamic implications
241	1.3	LA-ICP-MS	Xiaowei Li et al., 2015, U–Pb zircon geochronology, geochemical and Sr–Nd–Hf isotopic compositions of the Early Indosinian Tongren Pluton in West Qinling: Petrogenesis and geodynamic implications
240.5	1.6	LA-ICP-MS	Xiaowei Li et al., 2015, U–Pb zircon geochronology, geochemical and Sr–Nd–Hf isotopic compositions of the Early Indosinian Tongren Pluton in West Qinling: Petrogenesis and geodynamic implications
238.6	1.5	LA-ICP-MS	Xiaoye Jin et al. 2013. Geochronological and Geochemical Constraints on the Genesis and Tectonic Setting of Dewulu Intrusive Complex in Xiahe-Hezuo District of Western Qinling (in Chinese). Journal of Earch Sciences and Environment. .Volume 35, Issue 3, pages20–38
247.6	1.3	LA-ICP-MS	Xiaoye Jin et al. 2013. Geochronological and Geochemical Constraints on the Genesis and Tectonic Setting of Dewulu Intrusive Complex in Xiahe-Hezuo District of Western Qinling (in Chinese). Journal of Earch Sciences and Environment. .Volume 35, Issue 3, pages20–38
229.3	2	LA-ICP-MS	Xiongfei Huang 2013. zircon U-Pb chronology,geochemistry of the Late Triassic acid volcanic rocks in Tanchang area,West Qinling and their geological significance.Acta Petrologica Sinica.29(11): 3968-3980
449.7	2.2		Xu, X.Y., et al., 2008. Zircon U–Pb age, element geochemistry of Mesozoic acid volcanic rocks at Yindaoshi area in western Qinling. Acta Petrologica Sinica 23, 2845–2856.
402	0.8		Xue, F., et al., 1996. Palaeozoic pre- and postcollision calc-alkaline magmatism in the Qinling orogenic belt, central China, as documented by zircon ages on granitoid rocks. Journal of the Geological Society 153, 409–417.
470	9		Xue, F., et al., 1996. Palaeozoic pre- and postcollision calc-alkaline magmatism in the Qinling orogenic belt, central China, as documented by zircon ages on granitoid rocks. Journal of the Geological Society 153, 409–417.
211	2.6	LA-ICP-MS	Xueyi Xu, et al. 2007. Zircon U-Pb age, element geochemistry of Mesozoic acid volcanic rocks at Yindaoshi area in western Qinling.ACTA PETROLOGICA SINICA. 23(11): 2845-2856
264	1.4	LA-ICP-MS	Xuyi Xu, et al., 2012. The Granitoids Magmatism and Mineralization in West Section of the Western Qinling, NW China. Northwestern Geology. 184(45) 76-82.
241.6	4	LA-ICP-MS	Xuyi Xu, et al., 2012. The Granitoids Magmatism and Mineralization in West Section of the Western Qinling, NW China. Northwestern Geology. 184(45) 76-82.
233.5	1.5	LA-ICP-MS	Xuyi Xu, et al., 2012. The Granitoids Magmatism and Mineralization in West Section of the Western Qinling, NW China. Northwestern Geology. 184(45) 76-82.
216.3	1.4	LA-ICP-MS	Xuyi Xu, et al., 2012. The Granitoids Magmatism and Mineralization in West Section of the Western Qinling, NW China. Northwestern Geology. 184(45) 76-82.
264.4	1.3	LA-ICP-MS	Xuyi Xu, et al., 2012. The Granitoids Magmatism and Mineralization in West Section of the Western Qinling, NW China. Northwestern Geology. 184(45) 76-82.
441	33	LA-ICP-MS	Yan Zhen et al., 2012. Petrology,geochemistry and SHRIMP U-Pb dating of zircons from Late Triassic OIB-basalt in the conjunction of the Qinling-Qilian-Kunlun orogens. Earth Science Frontiers. 19, 168-180.
220.5	4.2	LA-ICP-MS	Yan Zhen et al., 2012. Petrology,geochemistry and SHRIMP U-Pb dating of zircons from Late Triassic OIB-basalt in the conjunction of the Qinling-Qilian-Kunlun orogens. Earth Science Frontiers. 19, 168-180.
471	1.4	LA-ICP-MS	Yang Zhao et al., 2006. LA-ICP-MS zircon U-Pb dating of gabbro in the Guanzizhen ophiolite,Tianshui, West Qinling China. Geological Bulletin of China. 25,1321-1325.
229.2	1.2	LA-ICP-MS	Yang, T., et al., 2012. Geochemistry, petrogenesis and tectonic implications of granitic plutons at the Liziyuan orogenic goldfield in the Western Qinling Orogen, central China. Geological Magazine, 150, 50-71.
260	2.1	LA-ICP-MS	Yang, T., et al., 2012. Geochemistry, petrogenesis and tectonic implications of granitic plutons at the Liziyuan orogenic goldfield in the Western Qinling Orogen, central China. Geological Magazine, 150, 50-71.
256.1	3.7	LA-ICP-MS	Yang, T., et al., 2012. Geochemistry, petrogenesis and tectonic implications of granitic plutons at the Liziyuan orogenic goldfield in the Western Qinling Orogen, central China. Geological Magazine, 150, 50-71.
219	2	LA-ICP-MS	Zeng, Q.T., et al. 2015. Episodic Triassic magmatism in the western South Qinling Orogen, central China, and its implications. Geological Journal. 49 (4-5) :402-423.
217	1.7	LA-ICP-MS	Zeng, Q.T., et al. 2015. Episodic Triassic magmatism in the western South Qinling Orogen, central China, and its implications. Geological Journal. 49 (4-5) :402-423.
217.1	1	LA-ICP-MS	Zeng, Q.T., et al. 2015. Episodic Triassic magmatism in the western South Qinling Orogen, central China, and its implications. Geological Journal. 49 (4-5) :402-423.
215.9	3	LA-ICP-MS	Zeng, Q.T., et al. 2015. Episodic Triassic magmatism in the western South Qinling Orogen, central China, and its implications. Geological Journal. 49 (4-5) :402-423.
214.5	2.1	LA-ICP-MS	Zeng, Q.T., et al. 2015. Episodic Triassic magmatism in the western South Qinling Orogen, central China, and its implications. Geological Journal. 49 (4-5) :402-423.
217.3	2.1	LA-ICP-MS	Zeng, Q.T., et al. 2015. Episodic Triassic magmatism in the western South Qinling Orogen, central China, and its implications. Geological Journal. 49 (4-5) :402-423.
216.6	1.8	LA-ICP-MS	Zeng, Q.T., et al. 2015. Episodic Triassic magmatism in the western South Qinling Orogen, central China, and its implications. Geological Journal. 49 (4-5) :402-423.
240.9	1	LA-ICP-MS	Zeng, Q.T., et al. 2015. Episodic Triassic magmatism in the western South Qinling Orogen, central China, and its implications. Geological Journal. 49 (4-5) :402-423.
242	3	SHRIMP	Zhang Tao et al., 2014. SHRIMP zircon U-Pb dating of Gangcha intrusions in Qinghai and its geological significance. Acta Petrologica Sinica,30(9): 2739-2748.
215	3	SHRIMP	Zhang Tao et al., 2014. SHRIMP zircon U-Pb dating of Gangcha intrusions in Qinghai and its geological significance. Acta Petrologica Sinica,30(9): 2739-2748.
238	3	SHRIMP	Zhang Tao et al., 2014. SHRIMP zircon U-Pb dating of Gangcha intrusions in Qinghai and its geological significance. Acta Petrologica Sinica,30(9): 2739-2748.
414	13	LA-ICP-MS	Zhang, Z.Q., et al., 2006. Isotopic Geochronology and Geochemistry of Ophiolites, Granites and Clastic Sedimentary Rocks in the Qinling Orogenic Belt. Geological Publishing House, Beijing. pp. 1–348.
438	3	LA-ICP-MS	Zhang, Z.Q., et al., 2006. Isotopic Geochronology and Geochemistry of Ophiolites, Granites and Clastic Sedimentary Rocks in the Qinling Orogenic Belt. Geological Publishing House, Beijing. pp. 1–348.
250.6	4.7	LA-ICP-MS	Lu, Y. C., et al., 2017. Zircon U-Pb LA-ICP-MS dating,petrogenesis and tectonic implication of the granodiorite at the Shuangpengxi skarn type gold-copper deposit, West Qinling. Acta Petrologica Sinica. 33( 2) : 545-564.
242.6	4.2	LA-ICP-MS	Lu, Y. C., et al., 2017. Zircon U-Pb LA-ICP-MS dating,petrogenesis and tectonic implication of the granodiorite at the Shuangpengxi skarn type gold-copper deposit, West Qinling. Acta Petrologica Sinica. 33( 2) : 545-564.
233.9	2.8	LA-ICP-MS	Lu, Y. C., et al., 2017. Zircon U-Pb LA-ICP-MS dating,petrogenesis and tectonic implication of the granodiorite at the Shuangpengxi skarn type gold-copper deposit, West Qinling. Acta Petrologica Sinica. 33( 2) : 545-564.
245.8	1.7	LA-ICP-MS	Zhang De-xian1, et al. Indosinian magmatism and tectonic setting of Xiahe-Hezuo area, western Qinling Mountains——implications from the Dewulu quartz diorite and Laodou quartz dioritic porphyry[J]. Geology in China, 2015(5): 1257-1273(in Chinese with English abstract).
243	1.9	LA-ICP-MS	Zhang De-xian1, et al. Indosinian magmatism and tectonic setting of Xiahe-Hezuo area, western Qinling Mountains——implications from the Dewulu quartz diorite and Laodou quartz dioritic porphyry[J]. Geology in China, 2015(5): 1257-1273(in Chinese with English abstract).
241	1.6	LA-ICP-MS	Zhang De-xian1, et al. Indosinian magmatism and tectonic setting of Xiahe-Hezuo area, western Qinling Mountains——implications from the Dewulu quartz diorite and Laodou quartz dioritic porphyry[J]. Geology in China, 2015(5): 1257-1273(in Chinese with English abstract).
241	2.1	LA-ICP-MS	Zhang De-xian1, et al. Indosinian magmatism and tectonic setting of Xiahe-Hezuo area, western Qinling Mountains——implications from the Dewulu quartz diorite and Laodou quartz dioritic porphyry[J]. Geology in China, 2015(5): 1257-1273(in Chinese with English abstract).
238.2	1.7	LA-ICP-MS	Zhang De-xian1, et al. Indosinian magmatism and tectonic setting of Xiahe-Hezuo area, western Qinling Mountains——implications from the Dewulu quartz diorite and Laodou quartz dioritic porphyry[J]. Geology in China, 2015(5): 1257-1273(in Chinese with English abstract).

## Sheet: Kunlun & SP-GZ
ages (Ma)	2σ error	system	source
Songpan-Ganzi and Easternmost Kunlun Shan
212.4	2.5	SHRIMP	Amy L. Weislogel.2008.Tectonostratigraphic and geochronologic constraints on evolution of the northeast Paleotethys from the Songpan-Ganzi complex, central China.Tectonophysics.Volume 451, Issues 1–4, 28 April 2008, Pages 331–345
213.5	3.3	SHRIMP	Amy L. Weislogel.2008.Tectonostratigraphic and geochronologic constraints on evolution of the northeast Paleotethys from the Songpan-Ganzi complex, central China.Tectonophysics.Volume 451, Issues 1–4, 28 April 2008, Pages 331–345
215.1	2	SHRIMP	Amy L. Weislogel.2008.Tectonostratigraphic and geochronologic constraints on evolution of the northeast Paleotethys from the Songpan-Ganzi complex, central China.Tectonophysics.Volume 451, Issues 1–4, 28 April 2008, Pages 331–345
220.33	1.7	SHRIMP	Amy L. Weislogel.2008.Tectonostratigraphic and geochronologic constraints on evolution of the northeast Paleotethys from the Songpan-Ganzi complex, central China.Tectonophysics.Volume 451, Issues 1–4, 28 April 2008, Pages 331–345
224.5	2	SHRIMP	Amy L. Weislogel.2008.Tectonostratigraphic and geochronologic constraints on evolution of the northeast Paleotethys from the Songpan-Ganzi complex, central China.Tectonophysics.Volume 451, Issues 1–4, 28 April 2008, Pages 331–345
805.9	6.7	SHRIMP	Amy L. Weislogel.2008.Tectonostratigraphic and geochronologic constraints on evolution of the northeast Paleotethys from the Songpan-Ganzi complex, central China.Tectonophysics.Volume 451, Issues 1–4, 28 April 2008, Pages 331–345
900	30	SHRIMP	Amy L. Weislogel.2008.Tectonostratigraphic and geochronologic constraints on evolution of the northeast Paleotethys from the Songpan-Ganzi complex, central China.Tectonophysics.Volume 451, Issues 1–4, 28 April 2008, Pages 331–345
94.4	2.4	LA-ICP-MS	Anthony Reid et al. 2007. Mesozoic plutons of the Yidun Arc, SW China: U/Pb geochronology and Hf isotopic signature.Ore Geology Reviews.Volume 31, Issues 1–4, April 2007, Pages 88–106
104.7	2	LA-ICP-MS	Anthony Reid et al. 2007. Mesozoic plutons of the Yidun Arc, SW China: U/Pb geochronology and Hf isotopic signature.Ore Geology Reviews.Volume 31, Issues 1–4, April 2007, Pages 88–106
215.2	3.4	LA-ICP-MS	Anthony Reid et al. 2007. Mesozoic plutons of the Yidun Arc, SW China: U/Pb geochronology and Hf isotopic signature.Ore Geology Reviews.Volume 31, Issues 1–4, April 2007, Pages 88–106
218.5	3	LA-ICP-MS	Anthony Reid et al. 2007. Mesozoic plutons of the Yidun Arc, SW China: U/Pb geochronology and Hf isotopic signature.Ore Geology Reviews.Volume 31, Issues 1–4, April 2007, Pages 88–106
239.5	5.8	LA-ICP-MS	Anthony Reid et al. 2007. Mesozoic plutons of the Yidun Arc, SW China: U/Pb geochronology and Hf isotopic signature.Ore Geology Reviews.Volume 31, Issues 1–4, April 2007, Pages 88–106
240.9	6.2	LA-ICP-MS	Anthony Reid et al. 2007. Mesozoic plutons of the Yidun Arc, SW China: U/Pb geochronology and Hf isotopic signature.Ore Geology Reviews.Volume 31, Issues 1–4, April 2007, Pages 88–106
245.2	3.4	LA-ICP-MS	Anthony Reid et al. 2007. Mesozoic plutons of the Yidun Arc, SW China: U/Pb geochronology and Hf isotopic signature.Ore Geology Reviews.Volume 31, Issues 1–4, April 2007, Pages 88–106
217.9	1.8	LA-ICP-MS	Bai-Qiu Wang et al.2011. Late Triassic porphyritic intrusions and associated volcanic rocks from the Shangri-La region, Yidun terrane, Eastern Tibetan Plateau: Adakitic magmatism and porphyry copper mineralization.Lithos.Volume 127, Issues 1–2, November 2011, Pages 24–38
219.8	3	LA-ICP-MS	Bai-Qiu Wang et al.2011. Late Triassic porphyritic intrusions and associated volcanic rocks from the Shangri-La region, Yidun terrane, Eastern Tibetan Plateau: Adakitic magmatism and porphyry copper mineralization.Lithos.Volume 127, Issues 1–2, November 2011, Pages 24–38
220.7	2	LA-ICP-MS	Bai-Qiu Wang et al.2011. Late Triassic porphyritic intrusions and associated volcanic rocks from the Shangri-La region, Yidun terrane, Eastern Tibetan Plateau: Adakitic magmatism and porphyry copper mineralization.Lithos.Volume 127, Issues 1–2, November 2011, Pages 24–38
224.2	1.7	LA-ICP-MS	Bai-Qiu Wang et al.2011. Late Triassic porphyritic intrusions and associated volcanic rocks from the Shangri-La region, Yidun terrane, Eastern Tibetan Plateau: Adakitic magmatism and porphyry copper mineralization.Lithos.Volume 127, Issues 1–2, November 2011, Pages 24–38
230.3	1.7	LA-ICP-MS	Bai-Qiu Wang et al.2011. Late Triassic porphyritic intrusions and associated volcanic rocks from the Shangri-La region, Yidun terrane, Eastern Tibetan Plateau: Adakitic magmatism and porphyry copper mineralization.Lithos.Volume 127, Issues 1–2, November 2011, Pages 24–38
402	24	SHRIMP	Bian, Q.T. et al. 2004. Age, geochemistry and tectonic setting of Buqingshan ophiolites, North Qinghai–Tibet Plateau, China. Journal of Asian Earth Sciences 23, 577–596.
467.2	0.9	SHRIMP	Bian, Q.T. et al. 2004. Age, geochemistry and tectonic setting of Buqingshan ophiolites, North Qinghai–Tibet Plateau, China. Journal of Asian Earth Sciences 23, 577–596.
481	130	Rb–Sr	Bian, Q.T. et al. 2004. Age, geochemistry and tectonic setting of Buqingshan ophiolites, North Qinghai–Tibet Plateau, China. Journal of Asian Earth Sciences 23, 577–596.
243.9	0.59	LA-ICP MS	Bile Li et al.2012. U-Pb dating and geochemistry of diorite in the eastern section from eastern Kunlun middle uplifted basement and granitic belt.Acta Petrologica Sinica,2012,28(4):1163-1172.
403	3	LA-ICP-MS	Bin Liu et al.2012. Petrogenesis of Early Devonian intrusive rocks in the east part of Eastern Kunlun Orogen and implication for Early Palaeozoic orogenic processes.Acta Petrologica Sinica.2012, (6):1785-1807
403	3	LA-ICP-MS	Bin Liu et al.2012. Petrogenesis of Early Devonian intrusive rocks in the east part of Eastern Kunlun Orogen and implication for Early Palaeozoic orogenic processes.Acta Petrologica Sinica.2012, (6):1785-1807
403	7	LA-ICP-MS	Bin Liu et al.2012. Petrogenesis of Early Devonian intrusive rocks in the east part of Eastern Kunlun Orogen and implication for Early Palaeozoic orogenic processes.Acta Petrologica Sinica.2012, (6):1785-1807
406	3	LA-ICP-MS	Bin Liu et al.2012. Petrogenesis of Early Devonian intrusive rocks in the east part of Eastern Kunlun Orogen and implication for Early Palaeozoic orogenic processes.Acta Petrologica Sinica.2012, (6):1785-1807
406	6	LA-ICP-MS	Bin Liu et al.2012. Petrogenesis of Early Devonian intrusive rocks in the east part of Eastern Kunlun Orogen and implication for Early Palaeozoic orogenic processes.Acta Petrologica Sinica.2012, (6):1785-1807
407	3	LA-ICP-MS	Bin Liu et al.2012. Petrogenesis of Early Devonian intrusive rocks in the east part of Eastern Kunlun Orogen and implication for Early Palaeozoic orogenic processes.Acta Petrologica Sinica.2012, (6):1785-1807
408	8	LA-ICP-MS	Bin Liu et al.2012. Petrogenesis of Early Devonian intrusive rocks in the east part of Eastern Kunlun Orogen and implication for Early Palaeozoic orogenic processes.Acta Petrologica Sinica.2012, (6):1785-1807
408	5	LA-ICP-MS	Bin Liu et al.2012. Petrogenesis of Early Devonian intrusive rocks in the east part of Eastern Kunlun Orogen and implication for Early Palaeozoic orogenic processes.Acta Petrologica Sinica.2012, (6):1785-1807
408	5	LA-ICP-MS	Bin Liu et al.2012. Petrogenesis of Early Devonian intrusive rocks in the east part of Eastern Kunlun Orogen and implication for Early Palaeozoic orogenic processes.Acta Petrologica Sinica.2012, (6):1785-1807
409	5	LA-ICP-MS	Bin Liu et al.2012. Petrogenesis of Early Devonian intrusive rocks in the east part of Eastern Kunlun Orogen and implication for Early Palaeozoic orogenic processes.Acta Petrologica Sinica.2012, (6):1785-1807
410	2	LA-ICP-MS	Bin Liu et al.2012. Petrogenesis of Early Devonian intrusive rocks in the east part of Eastern Kunlun Orogen and implication for Early Palaeozoic orogenic processes.Acta Petrologica Sinica.2012, (6):1785-1807
413	14	LA-ICP-MS	Bin Liu et al.2012. Petrogenesis of Early Devonian intrusive rocks in the east part of Eastern Kunlun Orogen and implication for Early Palaeozoic orogenic processes.Acta Petrologica Sinica.2012, (6):1785-1807
397	3	SHRIMP	Cailai Wu et al.2004. Zircon U-Pb SHRIMP dating of the Yematan batholith in Dulan, North Qaidam, NW China.Chinese Science Bulletin.Volume 49, Issue 16, pp 1736-1740.
243.4	1.9	LA-ICP-MS	Chao Shi et al.2013. Determination of the age for the Xingshu valley gold mineralization spots in the eastern segment of Kunlun orogenic belt and the geochemical characteristics of its surrounding rocks.Chinese Journal of Geology. 48(4):984-996.
213	3	SHRIMP	Chao Yuan et al.2009.Garnet-bearing tonalitic porphyry from East Kunlun, Northeast Tibetan Plateau: implications for adakite and magmas from the MASH Zone.International Journal of Earth Sciences.September 2009, Volume 98, Issue 6, pp 1489-1510
205	3	SHRIMP	Chao Yuan et al.2010. Triassic granitoids in the eastern Songpan Ganzi Fold Belt, SW China: Magmatic response to geodynamics of the deep lithosphere.Earth and Planetary Science Letters.Volume 290, Issues 3–4,Pages 481–492.
215	3	SHRIMP	Chao Yuan et al.2010. Triassic granitoids in the eastern Songpan Ganzi Fold Belt, SW China: Magmatic response to geodynamics of the deep lithosphere.Earth and Planetary Science Letters.Volume 290, Issues 3–4,Pages 481–492.
224	3	SHRIMP	Chao Yuan et al.2010. Triassic granitoids in the eastern Songpan Ganzi Fold Belt, SW China: Magmatic response to geodynamics of the deep lithosphere.Earth and Planetary Science Letters.Volume 290, Issues 3–4,Pages 481–492.
205	3	SHRIMP	Chao Yuan et al.2010.Triassic granitoids in the eastern Songpan Ganzi Fold Belt, SW China: Magmatic response to geodynamics of the deep lithosphere.Earth and Planetary Science Letters.Volume 290, Issues 3–4, 20 February 2010, Pages 481–492
215	3	SHRIMP	Chao Yuan et al.2010.Triassic granitoids in the eastern Songpan Ganzi Fold Belt, SW China: Magmatic response to geodynamics of the deep lithosphere.Earth and Planetary Science Letters.Volume 290, Issues 3–4, 20 February 2010, Pages 481–492
224	4	SHRIMP	Chao Yuan et al.2010.Triassic granitoids in the eastern Songpan Ganzi Fold Belt, SW China: Magmatic response to geodynamics of the deep lithosphere.Earth and Planetary Science Letters.Volume 290, Issues 3–4, 20 February 2010, Pages 481–492
246.61	0.62	LA-ICP-MS	Chen, G., et al., 2017. Paleo‐Tethyan Oceanic Crust Subduction in the Eastern Section of the East Kunlun Orogenic Belt: Geochronology and Petrogenesis of the Qushi'ang Granodiorite. Acta Geologica Sinica (English Edition), 91(2), 565-580.
245.45	0.9	LA-ICP-MS	Chen, G., et al., 2017. Paleo‐Tethyan Oceanic Crust Subduction in the Eastern Section of the East Kunlun Orogenic Belt: Geochronology and Petrogenesis of the Qushi'ang Granodiorite. Acta Geologica Sinica (English Edition), 91(2), 565-580.
242.6	3.4	LA-ICP-MS	Chen, G.C., et al. 2013. Late Triassic magma mixing in the East Kunlun orogenic belt: a case study of Helegang Xilikete granodiorites. Geol. China 40, 1044–1065 (in Chinese with English abstract).
245	1.8	LA-ICP-MS	Chen, G.C., et al. 2013. Late Triassic magma mixing in the East Kunlun orogenic belt: a case study of Helegang Xilikete granodiorites. Geol. China 40, 1044–1065 (in Chinese with English abstract).
244	1.9	LA-ICP-MS	Chen, G.C., et al. 2013. Late Triassic magma mixing in the East Kunlun orogenic belt: a case study of Helegang Xilikete granodiorites. Geol. China 40, 1044–1065 (in Chinese with English abstract).
243.5	1.8	LA-ICP-MS	Chen, G.C., et al. 2013. Late Triassic magma mixing in the East Kunlun orogenic belt: a case study of Helegang Xilikete granodiorites. Geol. China 40, 1044–1065 (in Chinese with English abstract).
394	13	LA-ICP-MS	Chen, H.W., et al., 2006. SHRIMP ages of Keyakedengtage complex in the East Kunlun Mountains and their geological implications. Acta Petrologica ET Mineralogica 25, 25–32 (in Chinese with English abstract).
205	13	LA-ICP-MS	Chen, W., ET AL., 2002. Magmatism and deformation times of the Xidatan rock series, East Kunlun Mountains. Science in China Series B: Chemistry, 45, 20-27.
239	6	SHRIMP	Chengdong Liu et al.2004. Mixing events between the crust-and mantle-derived magmas in Eastern Kunlun: evidence from zircon SHRIMP II chronology. Chinese Science Bulletin, 49(8), 828-834.
241	5	SHRIMP	Chengdong Liu et al.2004. Mixing events between the crust-and mantle-derived magmas in Eastern Kunlun: evidence from zircon SHRIMP II chronology. Chinese Science Bulletin, 49(8), 828-834.
242	6	SHRIMP	Chengdong Liu et al.2004. Mixing events between the crust-and mantle-derived magmas in Eastern Kunlun: evidence from zircon SHRIMP II chronology. Chinese Science Bulletin, 49(8), 828-834.
425.9	2.6	LA-MC-ICP	Chunjing Zhou et al.ZIRCON U-Pb DATING OF THE RHYOLITE-DACITE PORPHYRY IN THE SANDAOWAN OF EAST KUNLUN MOUNTAINS AND ITS GEOLOGICAL SIGNIFICANCE.JOURNAL OF GEOMECHANICS.16(1):28-35.
480	3	LA-ICP-MS	Cui, M.H., et al., 2011. Early Ordovician island arc of Qimantagh Mountain, eastern Kunlun: evidences from geochemistry, Sm–Nd isotope and geochronology of intermediate–basic igneous rocks. Acta Petrologica Sinica 27, 3365–3379 (in Chinese with English abstract).
245	2	LA-ICP-MS	Ding, Q. F., et al. 2014. Zircon U–Pb geochronology, geochemical and Sr–Nd–Hf isotopic compositions of the Triassic granite and diorite dikes from the Wulonggou mining area in the Eastern Kunlun Orogen, NW China: Petrogenesis and tectonic implications. Lithos, 205, 266-283.
244	2	LA-ICP-MS	Ding, Q. F., et al. 2014. Zircon U–Pb geochronology, geochemical and Sr–Nd–Hf isotopic compositions of the Triassic granite and diorite dikes from the Wulonggou mining area in the Eastern Kunlun Orogen, NW China: Petrogenesis and tectonic implications. Lithos, 205, 266-283.
244	2	LA-ICP-MS	Ding, Q. F., et al. 2014. Zircon U–Pb geochronology, geochemical and Sr–Nd–Hf isotopic compositions of the Triassic granite and diorite dikes from the Wulonggou mining area in the Eastern Kunlun Orogen, NW China: Petrogenesis and tectonic implications. Lithos, 205, 266-283.
215	4	LA-ICP-MS	Ding, Q. F., et al. 2014. Zircon U–Pb geochronology, geochemical and Sr–Nd–Hf isotopic compositions of the Triassic granite and diorite dikes from the Wulonggou mining area in the Eastern Kunlun Orogen, NW China: Petrogenesis and tectonic implications. Lithos, 205, 266-283.
153	3	LA-ICP-MS	F. Roger et al.2004.Timing of granite emplacement and cooling in the Songpan–Garzê Fold Belt (eastern Tibetan Plateau) with tectonic implications. Volume 22, Issue 5, January 2004, Pages 465–481
180	7	LA-ICP-MS	F. Roger et al.2004.Timing of granite emplacement and cooling in the Songpan–Garzê Fold Belt (eastern Tibetan Plateau) with tectonic implications. Volume 22, Issue 5, January 2004, Pages 465–481
181	4	LA-ICP-MS	F. Roger et al.2004.Timing of granite emplacement and cooling in the Songpan–Garzê Fold Belt (eastern Tibetan Plateau) with tectonic implications. Volume 22, Issue 5, January 2004, Pages 465–481
188	2	LA-ICP-MS	F. Roger et al.2004.Timing of granite emplacement and cooling in the Songpan–Garzê Fold Belt (eastern Tibetan Plateau) with tectonic implications. Volume 22, Issue 5, January 2004, Pages 465–481
195	6	LA-ICP-MS	F. Roger et al.2004.Timing of granite emplacement and cooling in the Songpan–Garzê Fold Belt (eastern Tibetan Plateau) with tectonic implications. Volume 22, Issue 5, January 2004, Pages 465–481
197	6	LA-ICP-MS	F. Roger et al.2004.Timing of granite emplacement and cooling in the Songpan–Garzê Fold Belt (eastern Tibetan Plateau) with tectonic implications. Volume 22, Issue 5, January 2004, Pages 465–481
428	2	LA-ICP-MS	Fancong Meng et al.2013. Discovery of Early Paleozoic eclogite from the East Kunlun, Western China and its tectonic significance.Gondwana Research.Volume 23, Issue 2, March 2013, Pages 825–836
934	11	LA-ICP-MS	Fancong Meng et al.2013. Discovery of Early Paleozoic eclogite from the East Kunlun, Western China and its tectonic significance.Gondwana Research.Volume 23, Issue 2, March 2013, Pages 825–836
243.5	1.7	LA-MC-ICP	Fang Wu et al.2010. ZIRCON U-Pb AGES FOR RHYOLITIC TUFFS OF THE NAOCANGJIANGOU FORMATION IN THE EAST KULUN OROGENIC BELT AND THEIR IMPLICATION.JOURNAL OF GEOMECHANICS.16(1):44-50.
239	1.1	Re–Os	Feng, C.Y., et al. 2009. Re–Os isotopic dating of molybdenite from the Suolajier skarn-type copper–molybdenum deposit of Qimatage Mountain in Qinghai province and its geological significance. Rock Miner. Anal. 28, 223–227 (in Chinese with English abstract).
210.1	4.8	Re–Os	Feng, C.Y., et al. 2010. Major types, time-space distribution and metallogeneses of polymetallic deposits in the Qimantage metallogenic belt, Eastern Kunlun Area. Northwest. Geol. 43, 10–17 (in Chinese with English abstract).
220	1	SHRIMP	Feng, C.Y., et al. 2010. Major types, time-space distribution and metallogeneses of polymetallic deposits in the Qimantage metallogenic belt, Eastern Kunlun Area. Northwest. Geol. 43, 10–17 (in Chinese with English abstract).
218	1	Re–Os	Feng, C.Y., et al. 2010. Major types, time-space distribution and metallogeneses of polymetallic deposits in the Qimantage metallogenic belt, Eastern Kunlun Area. Northwest. Geol. 43, 10–17 (in Chinese with English abstract).
235.4	1.8	LA-ICP-MS	Feng, C.Y., et al. 2011. Geochronologic constrains on magmatic intrusions and mineralization of the Jingren-Yingqingou polymetal deposit, Qinghai province. Acta Minalogica Sin. 31, 576–577 (in Chinese with English abstract).
219.2	1.4	SHRIMP	Feng, C.Y., et al. 2011. Geochronologic constrains on magmatic intrusions and mineralization of the Jingren-Yingqingou polymetal deposit, Qinghai province. Acta Minalogica Sin. 31, 576–577 (in Chinese with English abstract).
225	4	Re–Os	Feng, C.Y., et al. 2011. Geochronologic constrains on magmatic intrusions and mineralization of the Jingren-Yingqingou polymetal deposit, Qinghai province. Acta Minalogica Sin. 31, 576–577 (in Chinese with English abstract).
230.1	4.7	Re–Os	Feng, C.Y., et al. 2011. Geochronologic constrains on magmatic intrusions and mineralization of the Jingren-Yingqingou polymetal deposit, Qinghai province. Acta Minalogica Sin. 31, 576–577 (in Chinese with English abstract).
235.4	1.8	LA-ICP-MS	Feng, C.Y., et al. 2011. Geochronologic constrains on magmatic intrusions and mineralization of the Jingren-Yingqingou polymetal deposit, Qinghai province. Acta Minalogica Sin. 31, 576–577 (in Chinese with English abstract).
219.2	1.4	SHRIMP	Feng, C.Y., et al. 2011. Geochronologic constrains on magmatic intrusions and mineralization of the Jingren-Yingqingou polymetal deposit, Qinghai province. Acta Minalogica Sin. 31, 576–577 (in Chinese with English abstract).
225	4	Re–Os	Feng, C.Y., et al. 2011. Geochronologic constrains on magmatic intrusions and mineralization of the Jingren-Yingqingou polymetal deposit, Qinghai province. Acta Minalogica Sin. 31, 576–577 (in Chinese with English abstract).
230.1	4.7	LA-ICP-MS	Feng, C.Y., et al. 2011. Geochronologic constrains on magmatic intrusions and mineralization of the Jingren-Yingqingou polymetal deposit, Qinghai province. Acta Minalogica Sin. 31, 576–577 (in Chinese with English abstract).
235.4	1.8	LA-ICP-MS	Feng, C.Y., et al., 2011. Isotopic chronology of the Hutouya skarn lead–zine polymetallic ore district in Qimantagh area of Qinghai Province and its geological significance. Journal of Jilin University (Earth Science Edition) 41, 1806–1817 (in Chinese with English abstract).
219.2	1.4	LA-ICP-MS	Feng, C.Y., et al., 2011. Isotopic chronology of the Hutouya skarn lead–zine polymetallic ore district in Qimantagh area of Qinghai Province and its geological significance. Journal of Jilin University (Earth Science Edition) 41, 1806–1817 (in Chinese with English abstract).
204	1		Françoise Roger et al. 2003.Geochronological and geochemical constraints on Mesozoic suturing in east central Tibet.Tectonics.Volume 22, Issue 4, August 2003
206	7		Françoise Roger et al. 2003.Geochronological and geochemical constraints on Mesozoic suturing in east central Tibet.Tectonics.Volume 22, Issue 4, August 2003
207	3		Françoise Roger et al. 2003.Geochronological and geochemical constraints on Mesozoic suturing in east central Tibet.Tectonics.Volume 22, Issue 4, August 2003
217	10		Françoise Roger et al. 2003.Geochronological and geochemical constraints on Mesozoic suturing in east central Tibet.Tectonics.Volume 22, Issue 4, August 2003
251	2	LA-ICP-MS	Fujie Xiong et al.2011. LA-ICP-MS zircon U-Pb dating, elements and Sr-Nd-Hf isotope geochemistry of the Early Mesozoic mafic dyke swarms in East Kunlun orogenic belt.Acta Petrologica Sinica.27(11):3350-3364
228.3	0.5	LA-ICP-MS	Gao, Y. B., et al. 2012. Genesis, geochronology and Hf isotopic compositions of the magmatic rocks in Galinge iron deposit, eastern Kunlun. J. Lanzhou Univ. (Nat. Sci.) 48, 36–47 (in Chinese with English abstract).
234.4	0.6	LA-ICP-MS	Gao, Y. B., et al. 2012. Genesis, geochronology and Hf isotopic compositions of the magmatic rocks in Galinge iron deposit, eastern Kunlun. J. Lanzhou Univ. (Nat. Sci.) 48, 36–47 (in Chinese with English abstract).
230.7	2	LA-ICP-MS	Gao, Y. B., et al. 2012. Genesis, geochronology and Hf isotopic compositions of the magmatic rocks in Galinge iron deposit, eastern Kunlun. J. Lanzhou Univ. (Nat. Sci.) 48, 36–47 (in Chinese with English abstract).
219	1	LA-ICP-MS	Gao, Y.B., et al. 2014. Geochronology, geochemistry and Hf isotopic compositions of the granitic rocks related with iron mineralization in Yemaquan deposit, East Kunlun, NW China. Acta Petrologica Sinica,30(6): 1647-1665 (in Chinese with English abstract)
213	1	LA-ICP-MS	Gao, Y.B., et al. 2014. Geochronology, geochemistry and Hf isotopic compositions of the granitic rocks related with iron mineralization in Yemaquan deposit, East Kunlun, NW China. Acta Petrologica Sinica,30(6): 1647-1665 (in Chinese with English abstract)
393	2	LA-ICP-MS	Gao, Y.B., et al. 2014. Geochronology, geochemistry and Hf isotopic compositions of the granitic rocks related with iron mineralization in Yemaquan deposit, East Kunlun, NW China. Acta Petrologica Sinica,30(6): 1647-1665 (in Chinese with English abstract)
386	1	LA-ICP-MS	Gao, Y.B., et al. 2014. Geochronology, geochemistry and Hf isotopic compositions of the granitic rocks related with iron mineralization in Yemaquan deposit, East Kunlun, NW China. Acta Petrologica Sinica,30(6): 1647-1665 (in Chinese with English abstract)
391.1	1.4	LA-ICP-MS	Guan Wang et al.2013. Zircon U-Pb Geochronology and Geochemistry of the Early Devonian Syenogranite in the Xiarihamu Ore District from East Kunlun, with Implications for the Geodynamic Setting.Geotectonica et Metallogenia.2013, (4):685-697
388.9	3.7	LA-ICP-MS	Guo, C.L., et al. 2011. SHRIMP U–Pb (zircon), Ar–Ar (muscovite) and Re–Os (molybdenite) isotopic dating of the Taoxikeng tungsten deposit, South China Block. Ore Geol. Rev. 43, 26–39
446	2.2		Guocan Wang et al. 2003. Late Caledonian Ductile Thrusting Deformation in the Central East Kunlun Belt, Qinghai, China and Its Significance: Evidence from Geochronology.Volume 77, Issue 3, pages 311–319
218.3	1.4	LA-ICP-MS	Guochao Chen et al.2012.Zircon U Pb Geochronology Geochemical Characteristics and Geological Significance of Cocoe A'Long Quartz Diorites Body from the Hongshuichuan Area in East Kunlun.Acta Geologica Sinica.87(2):178-196
243.9	3	LA-ICP-MS	Guochao Chen et al.2012.Zircon U Pb Geochronology Geochemical Characteristics and Geological Significance of Cocoe A'Long Quartz Diorites Body from the Hongshuichuan Area in East Kunlun.Acta Geologica Sinica.87(2):178-196
430	1	SHRIMP	Hai-Min Ye et al.2008. Age and origin of high Ba–Sr appinite–granites at the northwestern margin of the Tibet Plateau: Implications for early Paleozoic tectonic evolution of the Western Kunlun orogenic belt.Gondwana Research.Volume 13, Issue 1, January 2008, Pages 126–138.
406	2.6	LA-ICP-MS	He, D., et al., 2016. Tectono-thermal events in East Kunlun, Northern Tibetan Plateau: evidence from zircon U–Pb geochronology. Gondwana Research, 30, 179-190.
408	69	LA-ICP-MS	He, D., et al., 2016. Tectono-thermal events in East Kunlun, Northern Tibetan Plateau: evidence from zircon U–Pb geochronology. Gondwana Research, 30, 179-190.
994	29	LA-ICP-MS	He, D., et al., 2016. Tectono-thermal events in East Kunlun, Northern Tibetan Plateau: evidence from zircon U–Pb geochronology. Gondwana Research, 30, 179-190.
910	46	LA-ICP-MS	He, D., et al., 2016. Tectono-thermal events in East Kunlun, Northern Tibetan Plateau: evidence from zircon U–Pb geochronology. Gondwana Research, 30, 179-190.
509	24	LA-ICP-MS	He, D., et al., 2016. Tectono-thermal events in East Kunlun, Northern Tibetan Plateau: evidence from zircon U–Pb geochronology. Gondwana Research, 30, 179-190.
534	2.6	LA-ICP-MS	He, D., et al., 2016. Tectono-thermal events in East Kunlun, Northern Tibetan Plateau: evidence from zircon U–Pb geochronology. Gondwana Research, 30, 179-190.
443	80	LA-ICP-MS	He, D., et al., 2016. Tectono-thermal events in East Kunlun, Northern Tibetan Plateau: evidence from zircon U–Pb geochronology. Gondwana Research, 30, 179-190.
870	41	LA-ICP-MS	He, D., et al., 2016. Tectono-thermal events in East Kunlun, Northern Tibetan Plateau: evidence from zircon U–Pb geochronology. Gondwana Research, 30, 179-190.
380	60	LA-ICP-MS	He, D., et al., 2016. Tectono-thermal events in East Kunlun, Northern Tibetan Plateau: evidence from zircon U–Pb geochronology. Gondwana Research, 30, 179-190.
1002	30	LA-ICP-MS	He, D., et al., 2016. Tectono-thermal events in East Kunlun, Northern Tibetan Plateau: evidence from zircon U–Pb geochronology. Gondwana Research, 30, 179-190.
401	3.5	LA-ICP-MS	He, D., et al., 2016. Tectono-thermal events in East Kunlun, Northern Tibetan Plateau: evidence from zircon U–Pb geochronology. Gondwana Research, 30, 179-190.
422	87	LA-ICP-MS	He, D., et al., 2016. Tectono-thermal events in East Kunlun, Northern Tibetan Plateau: evidence from zircon U–Pb geochronology. Gondwana Research, 30, 179-190.
1013	32	LA-ICP-MS	He, D., et al., 2016. Tectono-thermal events in East Kunlun, Northern Tibetan Plateau: evidence from zircon U–Pb geochronology. Gondwana Research, 30, 179-190.
411	95	LA-ICP-MS	He, D., et al., 2016. Tectono-thermal events in East Kunlun, Northern Tibetan Plateau: evidence from zircon U–Pb geochronology. Gondwana Research, 30, 179-190.
924	73	LA-ICP-MS	He, D., et al., 2016. Tectono-thermal events in East Kunlun, Northern Tibetan Plateau: evidence from zircon U–Pb geochronology. Gondwana Research, 30, 179-190.
224.7	3.4	Re–Os	He, S.Y., et al. 2009. Re-Os age of molybdenite from the Yazigou copper (molybdenum) mineralized area in eastern Kunlun of Qinghai Province, and its geological significance. Geotecton. Metallog. 33, 236–242 (in Chinese with English abstract).
216	5.7	SHRIMP	Hongfei Zhang et al. 2006. U–Pb zircon ages, geochemical and isotopic compositions of granitoids in Songpan-Garze fold belt, eastern Tibetan Plateau: constraints on petrogenesis and tectonic evolution of the basement.Contributions to Mineralogy & Petrology . Aug2006, Vol. 152 Issue 1, p75-88.
221	3.8	SHRIMP	Hongfei Zhang et al. 2006. U–Pb zircon ages, geochemical and isotopic compositions of granitoids in Songpan-Garze fold belt, eastern Tibetan Plateau: constraints on petrogenesis and tectonic evolution of the basement.Contributions to Mineralogy & Petrology . Aug2006, Vol. 152 Issue 1, p75-88.
211	1	LA-ICPMS	Hongfei Zhang et al. 2007 A-type granite and adakitic magmatism association in Songpan-Garze fold belt, eastern Tibetan Plateau: implication for lithospheric delamination. Lithos, 97 (3-4). 323-335.
218	2	LA-ICP-MS	Hongfei Zhang et al.2006.Granitoids around Gonghe basin in Qinghai province: petrogenesis and tectonic implications.ACTA PETROLOGICA SINICA.22(12): 2910-2922
235	2	LA-ICP-MS	Hongfei Zhang et al.2006.Granitoids around Gonghe basin in Qinghai province: petrogenesis and tectonic implications.ACTA PETROLOGICA SINICA.22(12): 2910-2922
205	1	LA-ICP-MS	Hongming Cai et al.2010. Petrogenesis of Indosinian volcanic rocks in Songpan-Garze fold belt of the northeastern Tibetan Plateau: New evidence for lithospheric delamination.SCIENCE CHINA-EARTH SCIENCES.53 (9): 1316-1328
210	3	LA-ICP-MS	Hongming Cai et al.2010. Petrogenesis of Indosinian volcanic rocks in Songpan-Garze fold belt of the northeastern Tibetan Plateau: New evidence for lithospheric delamination.SCIENCE CHINA-EARTH SCIENCES.53 (9): 1316-1328
394	13	SHRIMP	Hongwei Chen et al.2004. SHRIMP ages of Kayakedengtage complex in the East Kunlun Mountains and their geological implications.ACTA PETROLOGICA ET MINERALOGICA25(1):25-32.
403.3	7.2	SHRIMP	Hongwei Chen et al.2004. SHRIMP ages of Kayakedengtage complex in the East Kunlun Mountains and their geological implications.ACTA PETROLOGICA ET MINERALOGICA25(1):25-32.
218	2.5	LA-ICP-MS	Hu, Y., et al., 2016. Petrogenesis and tectonic significance of the late Triassic mafic dikes and felsic volcanic rocks in the East Kunlun Orogenic Belt, Northern Tibet Plateau. Lithos, 245, 205-222.
219.5	1.9	LA-ICP-MS	Hu, Y., et al., 2016. Petrogenesis and tectonic significance of the late Triassic mafic dikes and felsic volcanic rocks in the East Kunlun Orogenic Belt, Northern Tibet Plateau. Lithos, 245, 205-222.
227.5	1.5	LA-ICP-MS	Hu, Y., et al., 2016. Petrogenesis and tectonic significance of the late Triassic mafic dikes and felsic volcanic rocks in the East Kunlun Orogenic Belt, Northern Tibet Plateau. Lithos, 245, 205-222.
214	1	LA-ICP-MS	Hu, Y., et al., 2016. Petrogenesis and tectonic significance of the late Triassic mafic dikes and felsic volcanic rocks in the East Kunlun Orogenic Belt, Northern Tibet Plateau. Lithos, 245, 205-222.
212	2	LA-ICP-MS	Hu, Y., et al., 2016. Petrogenesis and tectonic significance of the late Triassic mafic dikes and felsic volcanic rocks in the East Kunlun Orogenic Belt, Northern Tibet Plateau. Lithos, 245, 205-222.
248.5	0.8	LA-ICP-MS	Huang, H., et al.2014. Geochemical constraints on the petrogenesis of granitoids in the East Kunlun Orogenic belt, northern Tibetan Plateau: implications for continental crust growth through syn-collisional felsic magmatism. Chemical Geology, 370, 1-18.
248.4	1.2	LA-ICP-MS	Huang, H., et al.2014. Geochemical constraints on the petrogenesis of granitoids in the East Kunlun Orogenic belt, northern Tibetan Plateau: implications for continental crust growth through syn-collisional felsic magmatism. Chemical Geology, 370, 1-18.
249.2	0.8	LA-ICP-MS	Huang, H., et al.2014. Geochemical constraints on the petrogenesis of granitoids in the East Kunlun Orogenic belt, northern Tibetan Plateau: implications for continental crust growth through syn-collisional felsic magmatism. Chemical Geology, 370, 1-18.
250.2	0.9	LA-ICP-MS	Huang, H., et al.2014. Geochemical constraints on the petrogenesis of granitoids in the East Kunlun Orogenic belt, northern Tibetan Plateau: implications for continental crust growth through syn-collisional felsic magmatism. Chemical Geology, 370, 1-18.
248.7	0.9	LA-ICP-MS	Huang, H., et al.2014. Geochemical constraints on the petrogenesis of granitoids in the East Kunlun Orogenic belt, northern Tibetan Plateau: implications for continental crust growth through syn-collisional felsic magmatism. Chemical Geology, 370, 1-18.
250.5	1	LA-ICP-MS	Huang, H., et al.2014. Geochemical constraints on the petrogenesis of granitoids in the East Kunlun Orogenic belt, northern Tibetan Plateau: implications for continental crust growth through syn-collisional felsic magmatism. Chemical Geology, 370, 1-18.
251	0.9	LA-ICP-MS	Huang, H., et al.2014. Geochemical constraints on the petrogenesis of granitoids in the East Kunlun Orogenic belt, northern Tibetan Plateau: implications for continental crust growth through syn-collisional felsic magmatism. Chemical Geology, 370, 1-18.
248.6	1	LA-ICP-MS	Huang, H., et al.2014. Geochemical constraints on the petrogenesis of granitoids in the East Kunlun Orogenic belt, northern Tibetan Plateau: implications for continental crust growth through syn-collisional felsic magmatism. Chemical Geology, 370, 1-18.
248	1.4	LA-ICP-MS	Huang, H., et al.2014. Geochemical constraints on the petrogenesis of granitoids in the East Kunlun Orogenic belt, northern Tibetan Plateau: implications for continental crust growth through syn-collisional felsic magmatism. Chemical Geology, 370, 1-18.
251	1	LA-ICP-MS	Huang, H., et al.2014. Geochemical constraints on the petrogenesis of granitoids in the East Kunlun Orogenic belt, northern Tibetan Plateau: implications for continental crust growth through syn-collisional felsic magmatism. Chemical Geology, 370, 1-18.
248.9	1.5	LA-ICP-MS	Huang, H., et al.2014. Geochemical constraints on the petrogenesis of granitoids in the East Kunlun Orogenic belt, northern Tibetan Plateau: implications for continental crust growth through syn-collisional felsic magmatism. Chemical Geology, 370, 1-18.
277.7	1.1	LA-ICP-MS	Huang, H., et al.2014. Geochemical constraints on the petrogenesis of granitoids in the East Kunlun Orogenic belt, northern Tibetan Plateau: implications for continental crust growth through syn-collisional felsic magmatism. Chemical Geology, 370, 1-18.
249.9	2.2	LA-ICP-MS	Huang, H., et al.2014. Geochemical constraints on the petrogenesis of granitoids in the East Kunlun Orogenic belt, northern Tibetan Plateau: implications for continental crust growth through syn-collisional felsic magmatism. Chemical Geology, 370, 1-18.
185	3	SHRIMP	Jianmin Hu et al.2005. SHRIMP U-Pb dating of zircons from granitoid bodies in the Songpan-Ganzi terrane and its implications.ACTA PETROLOGICA SINICA.
197	3	SHRIMP	Jianmin Hu et al.2005. SHRIMP U-Pb dating of zircons from granitoid bodies in the Songpan-Ganzi terrane and its implications.ACTA PETROLOGICA SINICA.
199	3	SHRIMP	Jianmin Hu et al.2005. SHRIMP U-Pb dating of zircons from granitoid bodies in the Songpan-Ganzi terrane and its implications.ACTA PETROLOGICA SINICA.
204	7	SHRIMP	Jianmin Hu et al.2005. SHRIMP U-Pb dating of zircons from granitoid bodies in the Songpan-Ganzi terrane and its implications.ACTA PETROLOGICA SINICA.
212	10	SHRIMP	Jianmin Hu et al.2005. SHRIMP U-Pb dating of zircons from granitoid bodies in the Songpan-Ganzi terrane and its implications.ACTA PETROLOGICA SINICA.
215	3	SHRIMP	Jianmin Hu et al.2005. SHRIMP U-Pb dating of zircons from granitoid bodies in the Songpan-Ganzi terrane and its implications.ACTA PETROLOGICA SINICA.
219	8	SHRIMP	Jianmin Hu et al.2005. SHRIMP U-Pb dating of zircons from granitoid bodies in the Songpan-Ganzi terrane and its implications.ACTA PETROLOGICA SINICA.
268	28	SHRIMP	Jianmin Hu et al.2005. SHRIMP U-Pb dating of zircons from granitoid bodies in the Songpan-Ganzi terrane and its implications.ACTA PETROLOGICA SINICA.
280	8	SHRIMP	Jianmin Hu et al.2005. SHRIMP U-Pb dating of zircons from granitoid bodies in the Songpan-Ganzi terrane and its implications.ACTA PETROLOGICA SINICA.
408	34	SHRIMP	Jianmin Hu et al.2005. SHRIMP U-Pb dating of zircons from granitoid bodies in the Songpan-Ganzi terrane and its implications.ACTA PETROLOGICA SINICA.
463	12	SHRIMP	Jianmin Hu et al.2005. SHRIMP U-Pb dating of zircons from granitoid bodies in the Songpan-Ganzi terrane and its implications.ACTA PETROLOGICA SINICA.
467	12	SHRIMP	Jianmin Hu et al.2005. SHRIMP U-Pb dating of zircons from granitoid bodies in the Songpan-Ganzi terrane and its implications.ACTA PETROLOGICA SINICA.
263	2	SHRIMP	Jian-Wei Zi et al.2010. U-Pb geochronology and geochemistry of the Dashibao Basalts in the Songpan-Ganzi Terrane, SW China, with implications for the age of Emeishan volcanism.American Journal of Science.vol. 310 no. 9 1054-1080.
509.4	6.8	LA-ICP-MS	Jianyun Feng et al. 2010.The discovery of the mafic-ultramafic melange in Kekesha area of Dulan County,East Kunlun region,and its LA-ICP-MS zircon U-Pb age.Chinese Geology,2010,37(1).
212.5	3.6		Jingang Lu et al. 2006 Zircon SHRIMP U-Pb dating of the Wolonggang monzogranite porphyry in the western segment of the Hoh Xil belt, Qinghai-Tibet Plateau and its geological significance[J]. Geological Bulletin of China,2006,(6):721-724
194.9	1	LA-ICP-MS	Jingen Dai et al.2013. Multi-stage tectono-magmatic events of the Eastern Kunlun Range, northern Tibet: Insights from U–Pb geochronology and (U–Th)/He thermochronology.Tectonophysics.Volume 599, 25 June 2013, Pages 97–106
228	2.4	LA-ICP-MS	Jingen Dai et al.2013. Multi-stage tectono-magmatic events of the Eastern Kunlun Range, northern Tibet: Insights from U–Pb geochronology and (U–Th)/He thermochronology.Tectonophysics.Volume 599, 25 June 2013, Pages 97–106
231	1	LA-ICP-MS	Jinyang Zhang et al.2012. Petrogenesis and tectonic significance of the Late Permian–Middle Triassic calc-alkaline granites in the Balong region, eastern Kunlun Orogen, China.Geological Magazine.v. 149 no. 5 p. 892-908
241	1	LA-ICP-MS	Jinyang Zhang et al.2012. Petrogenesis and tectonic significance of the Late Permian–Middle Triassic calc-alkaline granites in the Balong region, eastern Kunlun Orogen, China.Geological Magazine.v. 149 no. 5 p. 892-908
243	1	LA-ICP-MS	Jinyang Zhang et al.2012. Petrogenesis and tectonic significance of the Late Permian–Middle Triassic calc-alkaline granites in the Balong region, eastern Kunlun Orogen, China.Geological Magazine.v. 149 no. 5 p. 892-908
244	1	LA-ICP-MS	Jinyang Zhang et al.2012. Petrogenesis and tectonic significance of the Late Permian–Middle Triassic calc-alkaline granites in the Balong region, eastern Kunlun Orogen, China.Geological Magazine.v. 149 no. 5 p. 892-908
252	1	LA-ICP-MS	Jinyang Zhang et al.2012. Petrogenesis and tectonic significance of the Late Permian–Middle Triassic calc-alkaline granites in the Balong region, eastern Kunlun Orogen, China.Geological Magazine.v. 149 no. 5 p. 892-908
436.4	1.2	LA-ICP-MS	Junhu Ren et al.2009. LA-ICP-MS U-Pb zircon dating and geochemical characteristics of diabase-dykes from the Qingshuiquan area, eastern Kunlun orogenic belt.ACTA PETROLOGICA SINICA.25(5): 1135-1145
219.3	2.9	LA-ICP-MS	L. Xiao et al.2007. Late Triassic granitoids of the eastern margin of the Tibetan Plateau: Geochronology, petrogenesis and implications for tectonic evolution.Lithos.Volume 96, Issues 3–4, July 2007, Pages 436–452
223.64	4	LA-ICP-MS	L. Xiao et al.2007. Late Triassic granitoids of the eastern margin of the Tibetan Plateau: Geochronology, petrogenesis and implications for tectonic evolution.Lithos.Volume 96, Issues 3–4, July 2007, Pages 436–452
228.4	1.9	LA-ICP-MS	L. Xiao et al.2007. Late Triassic granitoids of the eastern margin of the Tibetan Plateau: Geochronology, petrogenesis and implications for tectonic evolution.Lithos.Volume 96, Issues 3–4, July 2007, Pages 436–452
411.6	2.4	LA-ICP-MS	Li, C., et al., 2015. Geochronology, petrology and Hf–S isotope geochemistry of the newly-discovered Xiarihamu magmatic Ni–Cu sulfide deposit in the Qinghai–Tibet plateau, western China. Lithos, 216, 224-240.
431.3	2.1	LA-ICP-MS	Li, C., et al., 2015. Geochronology, petrology and Hf–S isotope geochemistry of the newly-discovered Xiarihamu magmatic Ni–Cu sulfide deposit in the Qinghai–Tibet plateau, western China. Lithos, 216, 224-240.
501	7	LA-ICP-MS	Li, R. B., et al. 2013. Geochemical Features, Age, and Tectonic Significance of the Kekekete Mafic‐ultramafic Rocks, East Kunlun Orogen, China. Acta Geologica Sinica (English Edition), 87(5), 1319-1333.
435	3	LA-ICP-MS	Li, R. B., et al. 2015. Geochemistry and zircon U–Pb geochronology of granitic rocks in the Buqingshan tectonic mélange belt, northern Tibet Plateau, China and its implications for Prototethyan evolution. Journal of Asian Earth Sciences. 105:374-389.
436.9	5.7	LA-ICP-MS	Li, R. B., et al. 2015. Geochemistry and zircon U–Pb geochronology of granitic rocks in the Buqingshan tectonic mélange belt, northern Tibet Plateau, China and its implications for Prototethyan evolution. Journal of Asian Earth Sciences. 105:374-389.
425	6.7	LA-ICP-MS	Li, R. B., et al., 2013. Regional Tectonic Transformation in East Kunlun Orogenic Belt in Early Paleozoic: Constraints from the Geochronology and Geochemistry of Helegangnaren Alkali‐feldspar Granite. Acta Geologica Sinica (English Edition), 87(2), 333-345.
224	1.6	LA-ICP-MS	Li, S.J., et al. 2008. Geochronological study on Yazigou polymetallic deposit in eastern Kunlun, Qinhai Province. Acta Geol. Sin. 82, 949–955 (in Chinese with English abstract).
555	9	LA-ICP-MS	Li, W., et al. 2007. Zircon SHRIMP U-Pb ages and trace element geochemistry of the Kuhai gabbro and the Dur’ngoi diorite in the southern east Kunlun tectonic belt, Qinghai, Western China and their geological implications. Science in China Series D: Earth Sciences, 50, 331-338.
493	6	LA-ICP-MS	Li, W., et al. 2007. Zircon SHRIMP U-Pb ages and trace element geochemistry of the Kuhai gabbro and the Dur’ngoi diorite in the southern east Kunlun tectonic belt, Qinghai, Western China and their geological implications. Science in China Series D: Earth Sciences, 50, 331-338.
446.2	3.6	LA-ICP-MS	Li, W., et al., 2013. Paleozoic evolution of the Qimantagh magmatic arcs, Eastern Kunlun Mountains: Constraints from zircon dating of granitoids and modern river sands. Journal of Asian Earth Sciences, 77, 183-202.
484.6	7.3	LA-ICP-MS	Li, W., et al., 2013. Paleozoic evolution of the Qimantagh magmatic arcs, Eastern Kunlun Mountains: Constraints from zircon dating of granitoids and modern river sands. Journal of Asian Earth Sciences, 77, 183-202.
439	5.9	LA-ICP-MS	Li, W., et al., 2013. Paleozoic evolution of the Qimantagh magmatic arcs, Eastern Kunlun Mountains: Constraints from zircon dating of granitoids and modern river sands. Journal of Asian Earth Sciences, 77, 183-202.
424	3.5	LA-ICP-MS	Li, W., et al., 2013. Paleozoic evolution of the Qimantagh magmatic arcs, Eastern Kunlun Mountains: Constraints from zircon dating of granitoids and modern river sands. Journal of Asian Earth Sciences, 77, 183-202.
261.5	3.7	LA-ICP-MS	Li, W., et al., 2013. Paleozoic evolution of the Qimantagh magmatic arcs, Eastern Kunlun Mountains: Constraints from zircon dating of granitoids and modern river sands. Journal of Asian Earth Sciences, 77, 183-202.
461.7	4	LA-ICP-MS	Li, W., et al., 2013. Paleozoic evolution of the Qimantagh magmatic arcs, Eastern Kunlun Mountains: Constraints from zircon dating of granitoids and modern river sands. Journal of Asian Earth Sciences, 77, 183-202.
428.6	4.4	LA-ICP-MS	Li, W., et al., 2013. Paleozoic evolution of the Qimantagh magmatic arcs, Eastern Kunlun Mountains: Constraints from zircon dating of granitoids and modern river sands. Journal of Asian Earth Sciences, 77, 183-202.
342.9	8.1	LA-ICP-MS	Li, W., et al., 2013. Paleozoic evolution of the Qimantagh magmatic arcs, Eastern Kunlun Mountains: Constraints from zircon dating of granitoids and modern river sands. Journal of Asian Earth Sciences, 77, 183-202.
410.2	1.9	LA-ICP-MS	Li, W., et al., 2013. Paleozoic evolution of the Qimantagh magmatic arcs, Eastern Kunlun Mountains: Constraints from zircon dating of granitoids and modern river sands. Journal of Asian Earth Sciences, 77, 183-202.
439.2	1.2	LA-ICP-MS	Li, W., et al., 2013. Paleozoic evolution of the Qimantagh magmatic arcs, Eastern Kunlun Mountains: Constraints from zircon dating of granitoids and modern river sands. Journal of Asian Earth Sciences, 77, 183-202.
445	0.9	LA-ICP-MS	Li, W., et al., 2013. Paleozoic evolution of the Qimantagh magmatic arcs, Eastern Kunlun Mountains: Constraints from zircon dating of granitoids and modern river sands. Journal of Asian Earth Sciences, 77, 183-202.
555	9	LA-ICP-MS	Li, W.Y., 2008. Geochronology and Geochemistry of the Ophiolites and Island-arc-type igneous Rocks in the Western Qinling and the Eastern Kunlun Orogen: Implication for the evolution of the Tethyan Ocean [Ph.D. dissertation]: University of Science and Technology of China, Anhui, China, p.1–174 [In Chinese with English abstract.]
535	10	LA-ICP-MS	Li, W.Y., 2008. Geochronology and Geochemistry of the Ophiolites and Island-arc-type igneous Rocks in the Western Qinling and the Eastern Kunlun Orogen: Implication for the evolution of the Tethyan Ocean [Ph.D. dissertation]: University of Science and Technology of China, Anhui, China, p.1–174 [In Chinese with English abstract.]
493	6	LA-ICP-MS	Li, W.Y., 2008. Geochronology and Geochemistry of the Ophiolites and Island-arc-type igneous Rocks in the Western Qinling and the Eastern Kunlun Orogen: Implication for the evolution of the Tethyan Ocean [Ph.D. dissertation]: University of Science and Technology of China, Anhui, China, p.1–174 [In Chinese with English abstract.]
439	1.9	LA-ICP-MS	Li, Z. C., et al., 2014. Geochronology, Geochemistry and Tectonic Setting of the Bairiqiete Granodiorite Intrusion (Rock Mass) from the Buqingshan Tectonic Mélange Belt in the Southern Margin of East Kunlun. Acta Geologica Sinica 88(2): 584–597.
487	11	LA-ICP-MS	Li, Z. C., et al., 2016. Early Ordovician island‐arc‐type Manite granodiorite pluton from the Buqingshan Tectonic Mélange Belt in the southern margin of the East Kunlun Orogen: constraints on subduction of the Proto‐Tethyan Ocean. Geological Journal.
479	2	LA-ICP-MS	Li, Z. C., et al., 2016. Early Ordovician island‐arc‐type Manite granodiorite pluton from the Buqingshan Tectonic Mélange Belt in the southern margin of the East Kunlun Orogen: constraints on subduction of the Proto‐Tethyan Ocean. Geological Journal.
469	5	LA-ICP-MS	Liao, S.-Y., et al., 2010. Subducting sediment-derived arc granitoids: Evidence from the Datong pluton and its quenched enclaves in the western Kunlun orogen, northwest China: Mineralogy and Petrology, v. 100, p. 55–74.
466	5	LA-ICP-MS	Liao, S.-Y., et al., 2010. Subducting sediment-derived arc granitoids: Evidence from the Datong pluton and its quenched enclaves in the western Kunlun orogen, northwest China: Mineralogy and Petrology, v. 100, p. 55–74.
454	5	LA-ICP-MS	Liao, S.-Y., et al., 2010. Subducting sediment-derived arc granitoids: Evidence from the Datong pluton and its quenched enclaves in the western Kunlun orogen, northwest China: Mineralogy and Petrology, v. 100, p. 55–74.
473	5	LA-ICP-MS	Liao, S.-Y., et al., 2010. Subducting sediment-derived arc granitoids: Evidence from the Datong pluton and its quenched enclaves in the western Kunlun orogen, northwest China: Mineralogy and Petrology, v. 100, p. 55–74.
448	5	LA-ICP-MS	Liao, S.-Y., et al., 2010. Subducting sediment-derived arc granitoids: Evidence from the Datong pluton and its quenched enclaves in the western Kunlun orogen, northwest China: Mineralogy and Petrology, v. 100, p. 55–74.
244.2	2.1	SIMS	Liu, J.L., et al. 2012. SIMS zircon U-Pb dating and fluid inclusion studies of Xiadeboli Cu-Mo ore district in Dulan county, Qinghai Province, China. Acta Petrol. Sin. 28, 679–690 (in Chinese with English abstract).
223.2	2.2	LA-ICP-MS	Liu, J.P., et al. 2012. . Geochemistry and zircon LA-ICPMS U-Pb geochronology of intrusive body in Saishitang copper deposit, Qinghai Province, China. Chin. J. Nonferrous Met. 22, 622–632 (in Chinese with English abstract).
516	3	LA-ICP-MS	Liu, Z.Q., et al., 2011. LAICP-MS zircon U-Pb geochronology of the two suites of phiolites at the Buqingshan area of the A’nyemaqen orogenic belt in the southern margin of east Kunlun and its tectonic implication: Acta Petrologica Sinica, v. 31, p. 250–257. [In Chinese with English abstract.]
193	10	LA-ICP-MS	Li-Yun Zhang et al.2014. Age and geochemistry of western Hoh-Xil–Songpan-Ganzi granitoids, northern Tibet: Implications for the Mesozoic closure of the Paleo-Tethys ocean.Lithos.Volumes 190–191, March 2014, Pages 328–348.
202	1	LA-ICP-MS	Li-Yun Zhang et al.2014. Age and geochemistry of western Hoh-Xil–Songpan-Ganzi granitoids, northern Tibet: Implications for the Mesozoic closure of the Paleo-Tethys ocean.Lithos.Volumes 190–191, March 2014, Pages 328–348.
212	4	LA-ICP-MS	Li-Yun Zhang et al.2014. Age and geochemistry of western Hoh-Xil–Songpan-Ganzi granitoids, northern Tibet: Implications for the Mesozoic closure of the Paleo-Tethys ocean.Lithos.Volumes 190–191, March 2014, Pages 328–348.
212	6	LA-ICP-MS	Li-Yun Zhang et al.2014. Age and geochemistry of western Hoh-Xil–Songpan-Ganzi granitoids, northern Tibet: Implications for the Mesozoic closure of the Paleo-Tethys ocean.Lithos.Volumes 190–191, March 2014, Pages 328–348.
213	2	LA-ICP-MS	Li-Yun Zhang et al.2014. Age and geochemistry of western Hoh-Xil–Songpan-Ganzi granitoids, northern Tibet: Implications for the Mesozoic closure of the Paleo-Tethys ocean.Lithos.Volumes 190–191, March 2014, Pages 328–348.
213	6	LA-ICP-MS	Li-Yun Zhang et al.2014. Age and geochemistry of western Hoh-Xil–Songpan-Ganzi granitoids, northern Tibet: Implications for the Mesozoic closure of the Paleo-Tethys ocean.Lithos.Volumes 190–191, March 2014, Pages 328–348.
221	1	LA-ICP-MS	Li-Yun Zhang et al.2014. Age and geochemistry of western Hoh-Xil–Songpan-Ganzi granitoids, northern Tibet: Implications for the Mesozoic closure of the Paleo-Tethys ocean.Lithos.Volumes 190–191, March 2014, Pages 328–348.
225	3	LA-ICP-MS	Li-Yun Zhang et al.2014. Age and geochemistry of western Hoh-Xil–Songpan-Ganzi granitoids, northern Tibet: Implications for the Mesozoic closure of the Paleo-Tethys ocean.Lithos.Volumes 190–191, March 2014, Pages 328–348.
399.6	2.8	LA-MC-ICPMS	Lu Lu et al.2010. Zircon U-Pb age for rhyolite of the Maoniushan Formation and its tectonic significance in the East Kunlun Mountains.ACTA PETROLOGICA SINICA.26(4):1150-1158
404.9	4.8	LA-MC-ICPMS	Lu Lu et al.2010. Zircon U-Pb age for rhyolite of the Maoniushan Formation and its tectonic significance in the East Kunlun Mountains.ACTA PETROLOGICA SINICA.26(4):1150-1158
408.2	2.4	LA-MC-ICPMS	Lu Lu et al.2010. Zircon U-Pb age for rhyolite of the Maoniushan Formation and its tectonic significance in the East Kunlun Mountains.ACTA PETROLOGICA SINICA.26(4):1150-1158
423.2	1.8	LA-MC-ICPMS	Lu Lu et al.2010. Zircon U-Pb age for rhyolite of the Maoniushan Formation and its tectonic significance in the East Kunlun Mountains.ACTA PETROLOGICA SINICA.26(4):1150-1158
391.2	3. 4	LA-MC-ICP MS	Lu Lu et al.2010. ZIRCON U-Pb AGE FROM SYNTECTONIC GRANITIC PORPHYRY IN THE MIDDLE KUNLUN FAULT BELT AND ITS TECTONIC SIGNIFICANCE.JOURNAL OF GEOMECHANICS.16(1):36-43.
408.5	2. 3	LA-MC-ICP MS	Lu Lu et al.2010. ZIRCON U-Pb AGE FROM SYNTECTONIC GRANITIC PORPHYRY IN THE MIDDLE KUNLUN FAULT BELT AND ITS TECTONIC SIGNIFICANCE.JOURNAL OF GEOMECHANICS.16(1):36-43.
417.7	2	LA-MC-ICPMS	Lu Lu et al.2013. Zircon U-Pb Dating of Early Paleozoic Granites from the East Kunlun Mountains and Its Geological Significance.Acta Geoscientia Sinica.Vol.34 No.4: 447-454
419	2	LA-MC-ICPMS	Lu Lu et al.2013. Zircon U-Pb Dating of Early Paleozoic Granites from the East Kunlun Mountains and Its Geological Significance.Acta Geoscientia Sinica.Vol.34 No.4: 447-454
419.7	2.3	LA-MC-ICPMS	Lu Lu et al.2013. Zircon U-Pb Dating of Early Paleozoic Granites from the East Kunlun Mountains and Its Geological Significance.Acta Geoscientia Sinica.Vol.34 No.4: 447-454
419.9	2	LA-MC-ICPMS	Lu Lu et al.2013. Zircon U-Pb Dating of Early Paleozoic Granites from the East Kunlun Mountains and Its Geological Significance.Acta Geoscientia Sinica.Vol.34 No.4: 447-454
550	23	LA-ICP-MS	Ma, Y.S., et al., 2010. Discovery of erchang granite in Qimantagh region in Pan-African period and its significance. Journal of Qinghai University (Natural Science) 28, 56–60 (in Chinese with English abstract).
486	6	SHRIMP	Meng, F., et al., 2015. Heishan mafic–ultramafic rocks in the Qimantag area of Eastern Kunlun, NW China: remnants of an early Paleozoic incipient island arc. Gondwana Research, 27(2), 745-759.
455	18		Nengsong Chen et al.2007. EMP chemical ages of monazites from Central Zone of the eastern Kunlun Orogen: Records of multi-tectonometamorphic events[J]. Chinese Science Bulletin, 52(16): 2252-2263.
420	20		Nengsong Chen et al.2007. EMP chemical ages of monazites from Central Zone of the eastern Kunlun Orogen: Records of multi-tectonometamorphic events[J]. Chinese Science Bulletin, 52(16): 2252-2263.
246.1	3.8		Nengsong Chen et al.2007. EMP chemical ages of monazites from Central Zone of the eastern Kunlun Orogen: Records of multi-tectonometamorphic events[J]. Chinese Science Bulletin, 52(16): 2252-2263.
482	10	SHRIMP	Nengsong Chen et al.2008.
516.2	5.8	SHRIMP	Nengsong Chen et al.2008.
549	10	SHRIMP	Nengsong Chen et al.2008.
259.4	1.3	LA-ICP-MS	Peng, B., et al., 2016. Identification of A‐type granite in the southeastern Kunlun Orogen, Qinghai Province, China: implications for the tectonic framework of the Eastern Kunlun Orogen. Geological Journal.
190.2	1.5	Ar-Ar	Qiang Wang et al.2011. Late Triassic high-Mg andesite/dacite suites from northern Hohxil, North Tibet: Geochronology, geochemical characteristics, petrogenetic processes and tectonic implications.Lithos.Volume 126, Issues 1–2, Pages 54–67
210.4	1.9	Ar-Ar	Qiang Wang et al.2011. Late Triassic high-Mg andesite/dacite suites from northern Hohxil, North Tibet: Geochronology, geochemical characteristics, petrogenetic processes and tectonic implications.Lithos.Volume 126, Issues 1–2, Pages 54–67
210.9	1.6	Ar-Ar	Qiang Wang et al.2011. Late Triassic high-Mg andesite/dacite suites from northern Hohxil, North Tibet: Geochronology, geochemical characteristics, petrogenetic processes and tectonic implications.Lithos.Volume 126, Issues 1–2, Pages 54–67
211	2	LA-ICP-MS	Qiang Wang et al.2011. Late Triassic high-Mg andesite/dacite suites from northern Hohxil, North Tibet: Geochronology, geochemical characteristics, petrogenetic processes and tectonic implications.Lithos.Volume 126, Issues 1–2, Pages 54–67
252	3	LA-ICP-MS	Ren, H., et al., 2016. Ages, Sources and Tectonic Settings of the Triassic Igneous Rocks in the Easternmost Segment of the East Kunlun Orogen, Central China. Acta Geologica Sinica (English Edition), 2, 019.
244	3	LA-ICP-MS	Ren, H., et al., 2016. Ages, Sources and Tectonic Settings of the Triassic Igneous Rocks in the Easternmost Segment of the East Kunlun Orogen, Central China. Acta Geologica Sinica (English Edition), 2, 019.
237	3	LA-ICP-MS	Ren, H., et al., 2016. Ages, Sources and Tectonic Settings of the Triassic Igneous Rocks in the Easternmost Segment of the East Kunlun Orogen, Central China. Acta Geologica Sinica (English Edition), 2, 019.
234	2	LA-ICP-MS	Ren, H., et al., 2016. Ages, Sources and Tectonic Settings of the Triassic Igneous Rocks in the Easternmost Segment of the East Kunlun Orogen, Central China. Acta Geologica Sinica (English Edition), 2, 019.
233	2	LA-ICP-MS	Ren, H., et al., 2016. Ages, Sources and Tectonic Settings of the Triassic Igneous Rocks in the Easternmost Segment of the East Kunlun Orogen, Central China. Acta Geologica Sinica (English Edition), 2, 019.
232	3	LA-ICP-MS	Ren, H., et al., 2016. Ages, Sources and Tectonic Settings of the Triassic Igneous Rocks in the Easternmost Segment of the East Kunlun Orogen, Central China. Acta Geologica Sinica (English Edition), 2, 019.
207	3	LA-ICP-MS	Roger, F., et al. 2003. Geochronological and geochemical constraints on Mesozoic suturing in east central Tibet. Tectonics, 22(4).
217	10	LA-ICP-MS	Roger, F., et al. 2003. Geochronological and geochemical constraints on Mesozoic suturing in east central Tibet. Tectonics, 22(4).
206	7	LA-ICP-MS	Roger, F., et al. 2003. Geochronological and geochemical constraints on Mesozoic suturing in east central Tibet. Tectonics, 22(4).
204	1	LA-ICP-MS	Roger, F., et al. 2003. Geochronological and geochemical constraints on Mesozoic suturing in east central Tibet. Tectonics, 22(4).
682	25	LA-ICP-MS	Roger, F., et al. 2003. Geochronological and geochemical constraints on Mesozoic suturing in east central Tibet. Tectonics, 22(4).
244	4	LA-ICP-MS	Roger, F., et al. 2003. Geochronological and geochemical constraints on Mesozoic suturing in east central Tibet. Tectonics, 22(4).
234.6	0.9	LA-ICP-MS	Shao, F., et al., 2017. Petrogenesis of Triassic granitoids in the East Kunlun Orogenic Belt, northern Tibetan Plateau and their tectonic implications. Lithos, 282, 33-44.
234.7	0.9	LA-ICP-MS	Shao, F., et al., 2017. Petrogenesis of Triassic granitoids in the East Kunlun Orogenic Belt, northern Tibetan Plateau and their tectonic implications. Lithos, 282, 33-44.
236.8	0.7	LA-ICP-MS	Shao, F., et al., 2017. Petrogenesis of Triassic granitoids in the East Kunlun Orogenic Belt, northern Tibetan Plateau and their tectonic implications. Lithos, 282, 33-44.
239.3	0.7	LA-ICP-MS	Shao, F., et al., 2017. Petrogenesis of Triassic granitoids in the East Kunlun Orogenic Belt, northern Tibetan Plateau and their tectonic implications. Lithos, 282, 33-44.
239.7	0.8	LA-ICP-MS	Shao, F., et al., 2017. Petrogenesis of Triassic granitoids in the East Kunlun Orogenic Belt, northern Tibetan Plateau and their tectonic implications. Lithos, 282, 33-44.
237.5	0.8	LA-ICP-MS	Shao, F., et al., 2017. Petrogenesis of Triassic granitoids in the East Kunlun Orogenic Belt, northern Tibetan Plateau and their tectonic implications. Lithos, 282, 33-44.
220.3	0.7	LA-ICP-MS	Shao, F., et al., 2017. Petrogenesis of Triassic granitoids in the East Kunlun Orogenic Belt, northern Tibetan Plateau and their tectonic implications. Lithos, 282, 33-44.
212	2	LA-ICP-MS	Shuo Ding et al.2011. Geochemistry, geochronology and petrogenesis of East Kunlun high Nb-Ta rhyolites. 27(12):3603-3614
214	1	LA-ICP-MS	Shuo Ding et al.2011. Geochemistry, geochronology and petrogenesis of East Kunlun high Nb-Ta rhyolites. 27(12):3603-3614
234.5	4.8	LA-ICP-MS	Song, Z.B., et al., 2013. Geochemical characteristics of Harizha granite diorite-porphyry in East Kunlun and their geological implications. Mineral Deposits 32, 157–168 (in Chinese with English abstract).
831	51	LA-ICP-MS	Tan, S.X., et al., 2004. Discovery and geological significance of metamorphic and intrusive rock (system) of Qimantagh region in Jinning epoch. Northwestern Geology 37, 69–73 (in Chinese with English abstract).
229.9	3.5	Ar-Ar	Tian, C.S., et al. 2013. 40Ar- 39Ar geochronology of Tawenchahan Fepolymetallic deposit in Qimantag Mountain of Qinghai province and its geological implications. Mineral Deposits 32, 169–176 (in Chinese with English abstract).
251.1	0.7	LA-ICP-MS	Wang, B.Z., et al., 2009. Petrotectonic assemblages and temporal–spatial framework of the Late Paleozoic–Early Mesozoic intrusions in the Qimantagh Corridor of the East Kunlun belt. Geology in China 36, 769–782 (in Chinese with English abstract).
270.9	0.9	LA-ICP-MS	Wang, B.Z., et al., 2009. Petrotectonic assemblages and temporal–spatial framework of the Late Paleozoic–Early Mesozoic intrusions in the Qimantagh Corridor of the East Kunlun belt. Geology in China 36, 769–782 (in Chinese with English abstract).
284.3	1.2	LA-ICP-MS	Wang, B.Z., et al., 2009. Petrotectonic assemblages and temporal–spatial framework of the Late Paleozoic–Early Mesozoic intrusions in the Qimantagh Corridor of the East Kunlun belt. Geology in China 36, 769–782 (in Chinese with English abstract).
214.5	4.9	Re–Os	Wang, F.C., et al. 2013. Geological features and Re-Os isotopic dating of the Lalingzaohuo molybdenum polymetallic deposit in East Kunlun. Geol. China 40, 1209–1217 (in Chinese with English abstract).
240.8	4	LA-ICP-MS	Wang, F.C., et al. 2013. Geological features and Re-Os isotopic dating of the Lalingzaohuo molybdenum polymetallic deposit in East Kunlun. Geol. China 40, 1209–1217 (in Chinese with English abstract).
446	2.2	LA-ICP-MS	Wang, G. C., et al. 2003. Late Caledonian ductile thrusting deformation in the Central East Kunlun Belt, Qinghai, China and its significance: evidence from geochronology. Acta Geologica Sinica (English edition), 77(3), 311-319.
426.5	3.8	Ar-Ar	Wang, G. C., et al. 2003. Late Caledonian ductile thrusting deformation in the Central East Kunlun Belt, Qinghai, China and its significance: evidence from geochronology. Acta Geologica Sinica (English edition), 77(3), 311-319.
222.7	2.3	LA-ICP-MS	Wang, H., et al., 2016. Geology, geochronology and geochemistry of the Saishitang Cu deposit, East Kunlun Mountains, NW China: Constraints on ore genesis and tectonic setting. Ore Geology Reviews, 72, 43-59.
222.6	2.4	LA-ICP-MS	Wang, H., et al., 2016. Geology, geochronology and geochemistry of the Saishitang Cu deposit, East Kunlun Mountains, NW China: Constraints on ore genesis and tectonic setting. Ore Geology Reviews, 72, 43-59.
223.4	1.5	Re–Os	Wang, H., et al., 2016. Geology, geochronology and geochemistry of the Saishitang Cu deposit, East Kunlun Mountains, NW China: Constraints on ore genesis and tectonic setting. Ore Geology Reviews, 72, 43-59.
237	2	SHRIMP	Wang, S., et al. 2009. Zircon SHRIMP U-Pb dating of granodiorite in the Kaerqueka polymetallic ore deposit, Qimantage mountain, Qinghai Province, and its geological implications. Geol. China 36, 74–84 (in Chinese with English abstract).
433.6	3.8	LA-ICP-MS	Wu, C., et al. 2016. Pre-Cenozoic geologic history of the central and northern Tibetan Plateau and the role of Wilson cycles in constructing the Tethyan orogenic system. Lithosphere, 8(3), 254-292.
432.4	4.1	LA-ICP-MS	Wu, C., et al. 2016. Pre-Cenozoic geologic history of the central and northern Tibetan Plateau and the role of Wilson cycles in constructing the Tethyan orogenic system. Lithosphere, 8(3), 254-292.
416.5	2.6	LA-ICP-MS	Wu, C., et al. 2016. Pre-Cenozoic geologic history of the central and northern Tibetan Plateau and the role of Wilson cycles in constructing the Tethyan orogenic system. Lithosphere, 8(3), 254-292.
253.6	1.4	LA-ICP-MS	Wu, C., et al. 2016. Pre-Cenozoic geologic history of the central and northern Tibetan Plateau and the role of Wilson cycles in constructing the Tethyan orogenic system. Lithosphere, 8(3), 254-292.
251.4	1.7	LA-ICP-MS	Wu, C., et al. 2016. Pre-Cenozoic geologic history of the central and northern Tibetan Plateau and the role of Wilson cycles in constructing the Tethyan orogenic system. Lithosphere, 8(3), 254-292.
222.6	1.2	LA-ICP-MS	Wu, C., et al. 2016. Pre-Cenozoic geologic history of the central and northern Tibetan Plateau and the role of Wilson cycles in constructing the Tethyan orogenic system. Lithosphere, 8(3), 254-292.
204.1	2.6		Wu, Z.H. et al. 2005. Ages and thermo-chronological evolution of the North Xidatan granite in the South Kunlun Mts. Acta Geologica Sinica 79, 628–635.
230.5	4.2	LA-ICP-MS	Xi, R.G., et al. 2010. The geological significances, composition and age of the monzonitic granite in Kendekeke iron mine. Northwest. Geol. 43, 195–202 (in Chinese with English abstract)
222.02	0.91	LA-ICP-MS	Xia, R., et al., 2014. Crustal thickening prior to 220Ma in the East Kunlun Orogenic Belt: Insights from the Late Triassic granitoids in the Xiao-Nuomuhong pluton. Journal of Asian Earth Sciences, 93, 193-210.
220.22	0.71	LA-ICP-MS	Xia, R., et al., 2014. Crustal thickening prior to 220Ma in the East Kunlun Orogenic Belt: Insights from the Late Triassic granitoids in the Xiao-Nuomuhong pluton. Journal of Asian Earth Sciences, 93, 193-210.
222	1.1	LA-ICP-MS	Xia, R., et al., 2014. Crustal thickening prior to 220Ma in the East Kunlun Orogenic Belt: Insights from the Late Triassic granitoids in the Xiao-Nuomuhong pluton. Journal of Asian Earth Sciences, 93, 193-210.
227.2	1	LA-ICP-MS	Xia, R., et al., 2015. Molybdenite Re–Os, zircon U–Pb dating and Hf isotopic analysis of the Shuangqing Fe–Pb–Zn–Cu skarn deposit, East Kunlun Mountains, Qinghai Province, China. Ore Geology Reviews. 66: 114-131.
226.54	0.97	LA-ICP-MS	Xia, R., et al., 2015. Molybdenite Re–Os, zircon U–Pb dating and Hf isotopic analysis of the Shuangqing Fe–Pb–Zn–Cu skarn deposit, East Kunlun Mountains, Qinghai Province, China. Ore Geology Reviews. 66: 114-131.
225.8	1.6	LA-ICP-MS	Xia, R., et al., 2015. Molybdenite Re–Os, zircon U–Pb dating and Hf isotopic analysis of the Shuangqing Fe–Pb–Zn–Cu skarn deposit, East Kunlun Mountains, Qinghai Province, China. Ore Geology Reviews. 66: 114-131.
224.3	1.6	LA-ICP-MS	Xia, R., et al., 2015. Molybdenite Re–Os, zircon U–Pb dating and Hf isotopic analysis of the Shuangqing Fe–Pb–Zn–Cu skarn deposit, East Kunlun Mountains, Qinghai Province, China. Ore Geology Reviews. 66: 114-131.
226.5	5.1	Re–Os	Xia, R., et al., 2015. Molybdenite Re–Os, zircon U–Pb dating and Hf isotopic analysis of the Shuangqing Fe–Pb–Zn–Cu skarn deposit, East Kunlun Mountains, Qinghai Province, China. Ore Geology Reviews. 66: 114-131.
232.49	0.93	LA-ICP-MS	Xia, R., et al., 2015. Molybdenite Re–Os, zircon U–Pb dating and Hf isotopic analysis of the Shuangqing Fe–Pb–Zn–Cu skarn deposit, East Kunlun Mountains, Qinghai Province, China. Ore Geology Reviews. 66: 114-131.
232.6	1.2	LA-ICP-MS	Xia, R., et al., 2015. Molybdenite Re–Os, zircon U–Pb dating and Hf isotopic analysis of the Shuangqing Fe–Pb–Zn–Cu skarn deposit, East Kunlun Mountains, Qinghai Province, China. Ore Geology Reviews. 66: 114-131.
233.4	9.6	Re–Os	Xia, R., et al., 2015. Molybdenite Re–Os, zircon U–Pb dating and Hf isotopic analysis of the Shuangqing Fe–Pb–Zn–Cu skarn deposit, East Kunlun Mountains, Qinghai Province, China. Ore Geology Reviews. 66: 114-131.
213	3	SHRIMP	Xiao, W J., et al.2005. Accretionary tectonics of the Western Kunlun Orogen, China: A Paleozoic-Early Mesozoic, long-lived active continental margin with implications for the growth of Southern Eurasia.The Journal of Geology.2005, v. 113 n. 6, p. 687-705
220	5	SHRIMP	Xiao, W J., et al.2005. Accretionary tectonics of the Western Kunlun Orogen, China: A Paleozoic-Early Mesozoic, long-lived active continental margin with implications for the growth of Southern Eurasia.The Journal of Geology.2005, v. 113 n. 6, p. 687-705
229.5	0.5	LA-ICP-MS	Xiao, Y., et al. 2013. LA-MC-ICP-MS zircon U-Pb dating and sulfur isotope characteristics of Kendekeke Fe-polymetallic deposit, inghai Province. Mineral Deposits 32, 177–186 (in Chinese with English abstract).
458	9	LA-ICP-MS	Xiaofeng Gao et al.2010. Zircon LA-ICP-MS U-Pb dating and geological significance of Bashierxi granite in the eastern Kunlun area, China.GEOLOGICAL BULLETIN OF CHINA.29(7):1001-1008.
411	17	LA-ICP-MS	Xiaoping Long et al.2006. Zircon U-Pb geochronology and geological implications of the granitoids in Jinshuikou, East Kunlun, NW China.GEOCHIMICA. 35(4):367-376.
396	18	LA-ICP-MS	Xiaoping Long.2006. Zircon U-Pb geochronology and geological implications of the granitoids in Jinshuikou, East Kunlun, NW China.GEOCHIMICA. 35(4):367-376.
263	2	LA-ICP-MS	Xiong, F. H., et al. 2012. The origin of mafic microgranular enclaves and their host granodiorites from East Kunlun, Northern Qinghai-Tibet Plateau: implications for magma mixing during subduction of Paleo-Tethyan lithosphere. Mineralogy and Petrology, 104(3-4), 211-224.
261	2	LA-ICP-MS	Xiong, F. H., et al. 2012. The origin of mafic microgranular enclaves and their host granodiorites from East Kunlun, Northern Qinghai-Tibet Plateau: implications for magma mixing during subduction of Paleo-Tethyan lithosphere. Mineralogy and Petrology, 104(3-4), 211-224.
243	1	LA-ICP-MS	Xiong, F. H., et al., 2014. Reworking of old continental lithosphere an important crustal evolution mechanism in orogenic belts. Journal of the Geological Society, London, 171: 847-863.
247.8	3.7	LA-ICP-MS	Xiong, F. H., et al., 2014. Reworking of old continental lithosphere an important crustal evolution mechanism in orogenic belts. Journal of the Geological Society, London, 171: 847-863.
241	2.6	LA-ICP-MS	Xiong, F. H., et al., 2014. Reworking of old continental lithosphere an important crustal evolution mechanism in orogenic belts. Journal of the Geological Society, London, 171: 847-863.
241.2	1.3	LA-ICP-MS	Xiong, F. H., et al., 2014. Reworking of old continental lithosphere an important crustal evolution mechanism in orogenic belts. Journal of the Geological Society, London, 171: 847-863.
249.1	1.7	LA-ICP-MS	Xiong, F. H., et al., 2014. Reworking of old continental lithosphere an important crustal evolution mechanism in orogenic belts. Journal of the Geological Society, London, 171: 847-863.
235.8	1.5	LA-ICP-MS	Xiong, F. H., et al., 2014. Reworking of old continental lithosphere an important crustal evolution mechanism in orogenic belts. Journal of the Geological Society, London, 171: 847-863.
236	3.7	LA-ICP-MS	Xiong, F. H., et al., 2014. Reworking of old continental lithosphere an important crustal evolution mechanism in orogenic belts. Journal of the Geological Society, London, 171: 847-863.
238.5	1.5	LA-ICP-MS	Xiong, F. H., et al., 2014. Reworking of old continental lithosphere an important crustal evolution mechanism in orogenic belts. Journal of the Geological Society, London, 171: 847-863.
231.5	1.3	LA-ICP-MS	Xiong, F. H., et al., 2014. Reworking of old continental lithosphere an important crustal evolution mechanism in orogenic belts. Journal of the Geological Society, London, 171: 847-863.
223.6	1.1	LA-ICP-MS	Xiong, F. H., et al., 2014. Reworking of old continental lithosphere an important crustal evolution mechanism in orogenic belts. Journal of the Geological Society, London, 171: 847-863.
225.4	1.3	LA-ICP-MS	Xiong, F. H., et al., 2014. Reworking of old continental lithosphere an important crustal evolution mechanism in orogenic belts. Journal of the Geological Society, London, 171: 847-863.
253	2.5	LA-ICP-MS	Xiong, F. H., et al.2013. Petrogenetic and tectonic significance of Permian calc-alkaline lamprophyres, East Kunlun orogenic belt, Northern Qinghai-Tibet Plateau. International Geology Review, 55(14), 1817-1834.
443.6	1.7	LA-ICP-MS	Xiong, F. H., et al.2013. Petrogenetic and tectonic significance of Permian calc-alkaline lamprophyres, East Kunlun orogenic belt, Northern Qinghai-Tibet Plateau. International Geology Review, 55(14), 1817-1834.
447.3	2.4	LA-ICP-MS	Xiong, F., et al., 2015. Geochemistry, zircon U–Pb ages and Sr–Nd–Hf isotopes of an Ordovician appinitic pluton in the East Kunlun orogen: New evidence for Proto-Tethyan subduction. Journal of Asian Earth Sciences, 111, 681-697.
447.3	5.1	LA-ICP-MS	Xiong, F., et al., 2015. Geochemistry, zircon U–Pb ages and Sr–Nd–Hf isotopes of an Ordovician appinitic pluton in the East Kunlun orogen: New evidence for Proto-Tethyan subduction. Journal of Asian Earth Sciences, 111, 681-697.
446.8	2.6	LA-ICP-MS	Xiong, F., et al., 2015. Geochemistry, zircon U–Pb ages and Sr–Nd–Hf isotopes of an Ordovician appinitic pluton in the East Kunlun orogen: New evidence for Proto-Tethyan subduction. Journal of Asian Earth Sciences, 111, 681-697.
235.4	1.5	LA-ICP-MS	Xiong, F., et al., 2016. Geochronology and petrogenesis of Triassic high-K calc-alkaline granodiorites in the East Kunlun orogen, West China: Juvenile lower crustal melting during post-collisional extension. Journal of Earth Science, 27(3), 474-490.
234.5	1.9	LA-ICP-MS	Xiong, F., et al., 2016. Geochronology and petrogenesis of Triassic high-K calc-alkaline granodiorites in the East Kunlun orogen, West China: Juvenile lower crustal melting during post-collisional extension. Journal of Earth Science, 27(3), 474-490.
393.7	2.8	LA-ICP-MS	Xiong, F., et al., 2014. Geochronology and geochemistry of Middle Devonian mafic dykes in the East Kunlun orogenic belt, Northern Tibet Plateau: Implications for the transition from Prototethys to Paleotethys orogeny. Chemie der Erde-Geochemistry, 74(2), 225-235.
392.5	2.5	LA-ICP-MS	Xiong, F., et al., 2014. Geochronology and geochemistry of Middle Devonian mafic dykes in the East Kunlun orogenic belt, Northern Tibet Plateau: Implications for the transition from Prototethys to Paleotethys orogeny. Chemie der Erde-Geochemistry, 74(2), 225-235.
220.4	2.3	SHRIMP	Xiu-gen Fu et al. 2010. The Late Triassic rift-related volcanic rocks from eastern Qiangtang, northern Tibet (China): Age and tectonic implications.Gondwana Research.Volume 17, Issue 1, Pages 135–144
228.8	3.7	LA-ICP-MS	Xuanhua Chen et al.2012. Paleozoic and Mesozoic Basement Magmatisms of Eastern Qaidam Basin, Northern Qinghai-Tibet Plateau: LA-ICP-MS Zircon U-Pb Geochronology and its Geological Significance.Acta Geologica Sinica - English Edition.Volume 86, Issue 2, pages 350–369
234.5	3.9	LA-ICP-MS	Xuanhua Chen et al.2012. Paleozoic and Mesozoic Basement Magmatisms of Eastern Qaidam Basin, Northern Qinghai-Tibet Plateau: LA-ICP-MS Zircon U-Pb Geochronology and its Geological Significance.Acta Geologica Sinica - English Edition.Volume 86, Issue 2, pages 350–369
238.5	4.8	LA-ICP-MS	Xuanhua Chen et al.2012. Paleozoic and Mesozoic Basement Magmatisms of Eastern Qaidam Basin, Northern Qinghai-Tibet Plateau: LA-ICP-MS Zircon U-Pb Geochronology and its Geological Significance.Acta Geologica Sinica - English Edition.Volume 86, Issue 2, pages 350–369
240.8	4	LA-ICP-MS	Xuanhua Chen et al.2012. Paleozoic and Mesozoic Basement Magmatisms of Eastern Qaidam Basin, Northern Qinghai-Tibet Plateau: LA-ICP-MS Zircon U-Pb Geochronology and its Geological Significance.Acta Geologica Sinica - English Edition.Volume 86, Issue 2, pages 350–369
241.4	4.1	LA-ICP-MS	Xuanhua Chen et al.2012. Paleozoic and Mesozoic Basement Magmatisms of Eastern Qaidam Basin, Northern Qinghai-Tibet Plateau: LA-ICP-MS Zircon U-Pb Geochronology and its Geological Significance.Acta Geologica Sinica - English Edition.Volume 86, Issue 2, pages 350–369
241.8	4.6	LA-ICP-MS	Xuanhua Chen et al.2012. Paleozoic and Mesozoic Basement Magmatisms of Eastern Qaidam Basin, Northern Qinghai-Tibet Plateau: LA-ICP-MS Zircon U-Pb Geochronology and its Geological Significance.Acta Geologica Sinica - English Edition.Volume 86, Issue 2, pages 350–369
245.1	4.4	LA-ICP-MS	Xuanhua Chen et al.2012. Paleozoic and Mesozoic Basement Magmatisms of Eastern Qaidam Basin, Northern Qinghai-Tibet Plateau: LA-ICP-MS Zircon U-Pb Geochronology and its Geological Significance.Acta Geologica Sinica - English Edition.Volume 86, Issue 2, pages 350–369
248.1	5.1	LA-ICP-MS	Xuanhua Chen et al.2012. Paleozoic and Mesozoic Basement Magmatisms of Eastern Qaidam Basin, Northern Qinghai-Tibet Plateau: LA-ICP-MS Zircon U-Pb Geochronology and its Geological Significance.Acta Geologica Sinica - English Edition.Volume 86, Issue 2, pages 350–369
250.1	4.6	LA-ICP-MS	Xuanhua Chen et al.2012. Paleozoic and Mesozoic Basement Magmatisms of Eastern Qaidam Basin, Northern Qinghai-Tibet Plateau: LA-ICP-MS Zircon U-Pb Geochronology and its Geological Significance.Acta Geologica Sinica - English Edition.Volume 86, Issue 2, pages 350–369
250.9	5.1	LA-ICP-MS	Xuanhua Chen et al.2012. Paleozoic and Mesozoic Basement Magmatisms of Eastern Qaidam Basin, Northern Qinghai-Tibet Plateau: LA-ICP-MS Zircon U-Pb Geochronology and its Geological Significance.Acta Geologica Sinica - English Edition.Volume 86, Issue 2, pages 350–369
253	4.6	LA-ICP-MS	Xuanhua Chen et al.2012. Paleozoic and Mesozoic Basement Magmatisms of Eastern Qaidam Basin, Northern Qinghai-Tibet Plateau: LA-ICP-MS Zircon U-Pb Geochronology and its Geological Significance.Acta Geologica Sinica - English Edition.Volume 86, Issue 2, pages 350–369
253.1	5.4	LA-ICP-MS	Xuanhua Chen et al.2012. Paleozoic and Mesozoic Basement Magmatisms of Eastern Qaidam Basin, Northern Qinghai-Tibet Plateau: LA-ICP-MS Zircon U-Pb Geochronology and its Geological Significance.Acta Geologica Sinica - English Edition.Volume 86, Issue 2, pages 350–369
257.8	5.5	LA-ICP-MS	Xuanhua Chen et al.2012. Paleozoic and Mesozoic Basement Magmatisms of Eastern Qaidam Basin, Northern Qinghai-Tibet Plateau: LA-ICP-MS Zircon U-Pb Geochronology and its Geological Significance.Acta Geologica Sinica - English Edition.Volume 86, Issue 2, pages 350–369
420.4	7.8	LA-ICP-MS	Xuanhua Chen et al.2012. Paleozoic and Mesozoic Basement Magmatisms of Eastern Qaidam Basin, Northern Qinghai-Tibet Plateau: LA-ICP-MS Zircon U-Pb Geochronology and its Geological Significance.Acta Geologica Sinica - English Edition.Volume 86, Issue 2, pages 350–369
422.9	8	LA-ICP-MS	Xuanhua Chen et al.2012. Paleozoic and Mesozoic Basement Magmatisms of Eastern Qaidam Basin, Northern Qinghai-Tibet Plateau: LA-ICP-MS Zircon U-Pb Geochronology and its Geological Significance.Acta Geologica Sinica - English Edition.Volume 86, Issue 2, pages 350–369
493.1	8.9	LA-ICP-MS	Xuanhua Chen et al.2012. Paleozoic and Mesozoic Basement Magmatisms of Eastern Qaidam Basin, Northern Qinghai-Tibet Plateau: LA-ICP-MS Zircon U-Pb Geochronology and its Geological Significance.Acta Geologica Sinica - English Edition.Volume 86, Issue 2, pages 350–369
515.2	4.4	LA-ICP-MS	Yafeng Zhang et al.2010. LA-ICP-MS zircon U-Pb age of quartz diorite at the Kekesha area of Dulan County, eastern section of the East Kunlun orogenic belt, China and its significance.Geologcal Bulletin OF China,2010,29(1):79-85.
228.49	0.84	LA-ICP-MS	Yan, Y.F., et al. 2012. Molybdenum containing granites in Lalingzaohuo of the East Kunlun. China Sci. Technol. Inf. 37–39 (in Chinese with English abstract).
248.4	0.83	LA-ICP-MS	Yang, Y.Q. 2013. Study on geologica characteristics and genesis of Aikengdelesite molybdenum (copper) deposit, eastern Kunlun, Qinghai province. Jilin University, p. 96, (in Chinese with English sumary).
268.7	1.6	LA-ICP-MS	Yanqian Yang et al.2013. Zircon U-Pb Ages and Its Geological Significance of the MonzoniticGranite in the Aikengdelesite, Eastern Kunlun.2013,Northwestern Geology.46(1):56-62
406.1	2.9	SHRIMP	Yaoling Zhang et al.2010. SHRIMP zircon U-Pb ages and tectonic significance of Maoniushan Formation volcanic rocks in East Kunlun orogenic belt, China.
450. 4	4. 3	SHRIMP	Yaoling Zhang et al.2010. SHRIMP ZIRCON U-Pb AGES OF RHYOLITE FROM THE NAIJ TAL GROUP IN THE EAST KULUN OROGENIC BELT.JOURNAL OF GEOMECHANICS.16(1):21-27.
238	1	LA-ICP-MS	Yin, L.J., et al. 2013. Geochronology, geochemistry and geological significance of granites from the Baishiya skarn iron-polymetallic deposit, Dulan, Qinghai Province. Xinjiang Geol. 31, 248–255 (in Chinese with English abstract).
255.3	3.6	LA-ICP-MS	Yu Sun et al.2009. Halagatu Magma Mixing Granite in the East Kunlun Mountains- Evidence from Zircon U-Pb Dating.ACTA GEOLOGICA SINICA.83(7):1000-1010
401	6	SHRIMP	Yunhai Zhu et al.2006. SHRIMP zircon U-Pb age and significance of Early Paleozoic volcanic rocks in East Kunlun orogenic belt, Qinghai Province, China. Science in China Series D, 49(1), 88-96.
419	5	SHRIMP	Yunhai Zhu et al.2006. SHRIMP zircon U-Pb age and significance of Early Paleozoic volcanic rocks in East Kunlun orogenic belt, Qinghai Province, China. Science in China Series D, 49(1), 88-96.
204.1	2.6	SHRIMP	Yunhua Liu et al.2006.Zircon SHRIMP U-Pb dating of the Jingren granite, Yemaquan region of the east Kunlun and its geological significance Acta Petrologica Sinica.ACTA PETROLOGICA SINICA.
525	3	LA-ICP-MS	Zhang, C.L., et al., 2004. Zircon SHRIMP age determination of the giant-crystal gabbro and basalt in Kuda, West Kunlun: Dismembering of the Kuda ophiolite: Geological Reviews, v. 50, p. 639–643. [In Chinese with English abstract.]
432	2	LA-ICP-MS	Zhang, J. Y., et al., 2014. Early Paleozoic high-Mg diorite-granodiorite in the eastern Kunlun Orogen, western China: Response to continental collision and slab break-off. 210-211: 129–146.
432	2	LA-ICP-MS	Zhang, J. Y., et al., 2014. Early Paleozoic high-Mg diorite-granodiorite in the eastern Kunlun Orogen, western China: Response to continental collision and slab break-off. 210-211: 129–146.
427	3	LA-ICP-MS	Zhang, J. Y., et al., 2014. Early Paleozoic high-Mg diorite-granodiorite in the eastern Kunlun Orogen, western China: Response to continental collision and slab break-off. 210-211: 129–146.
233	1.6	LA-ICP-MS	Zhang, J., et al., 2017. Controls on the formation of Cu-rich magmas: Insights from the Late Triassic post-collisional Saishitang complex in the eastern Kunlun Orogen, western China. Lithos, 278, 400-418.
234.1	3.6	LA-ICP-MS	Zhang, J., et al., 2017. Controls on the formation of Cu-rich magmas: Insights from the Late Triassic post-collisional Saishitang complex in the eastern Kunlun Orogen, western China. Lithos, 278, 400-418.
218.3	2.1	LA-ICP-MS	Zhang, J., et al., 2017. Controls on the formation of Cu-rich magmas: Insights from the Late Triassic post-collisional Saishitang complex in the eastern Kunlun Orogen, western China. Lithos, 278, 400-418.
218.5	1.9	LA-ICP-MS	Zhang, J., et al., 2017. Controls on the formation of Cu-rich magmas: Insights from the Late Triassic post-collisional Saishitang complex in the eastern Kunlun Orogen, western China. Lithos, 278, 400-418.
406.1	2.9	SHRIMP	Zhang, Y.L., et al., 2010. SHIRMP zircon U–Pb ages and tectonic significance of Maoniushan Formation volcanic rocks in East Kunlun orogenic belt, China. Geological Bulletin of China 29, 1614–1618 (in Chinese with English abstract).
200	2	LA-ICP-MS	Zhangliang Shi et al. 2009. Petrogenesis of strongly peraluminous granites in markan area, songpan fold belt and its tectonic implication.Journal of China University of Geosciences: Earth Science 34 (4), 569–584 (in Chinese with English abstract).
208	2	LA-ICP-MS	Zhangliang Shi et al. 2009. Petrogenesis of strongly peraluminous granites in markan area, songpan fold belt and its tectonic implication.Journal of China University of Geosciences: Earth Science 34 (4), 569–584 (in Chinese with English abstract).
403	3	LA-ICP-MS	Zhenming Zhao et al.2008. The Evidence of Intrusive Rocks about Collision-orogeny during Early Devonian in Eastern Kunlun Area.GEOLOGICAL REVIEW.54(1):1-11.
407.7	7.5	LA-ICP-MS	Zhenming Zhao et al.2008. The Evidence of Intrusive Rocks about Collision-orogeny during Early Devonian in Eastern Kunlun Area.GEOLOGICAL REVIEW.54(1):1-11.
408.3	5.3	LA-ICP-MS	Zhenming Zhao et al.2008. The Evidence of Intrusive Rocks about Collision-orogeny during Early Devonian in Eastern Kunlun Area.GEOLOGICAL REVIEW.54(1):1-11.
410.2	1.9	LA-ICP-MS	Zhenming Zhao et al.2008. The Evidence of Intrusive Rocks about Collision-orogeny during Early Devonian in Eastern Kunlun Area.GEOLOGICAL REVIEW.54(1):1-11.
413	14	LA-ICP-MS	Zhenming Zhao et al.2008. The Evidence of Intrusive Rocks about Collision-orogeny during Early Devonian in Eastern Kunlun Area.GEOLOGICAL REVIEW.54(1):1-11.
234.5	4.8	LA-ICP-MS	Zhongbao Song et al. Geochemical characteristics of Harizha granite diorite-porphyry in East Kunlun and their geological implications.Mineral Deposits.32(1):157-168.
447	1.6	LA-ICP-MS	Zhou, B., et al., 2016. Geochemistry and zircon U-Pb geochronology of granitoids in the East Kunlun Orogenic Belt, northern Tibetan Plateau: origin and tectonic implications. Journal of Asian Earth Sciences, 130, 265-281.
448	2.5	LA-ICP-MS	Zhou, B., et al., 2016. Geochemistry and zircon U-Pb geochronology of granitoids in the East Kunlun Orogenic Belt, northern Tibetan Plateau: origin and tectonic implications. Journal of Asian Earth Sciences, 130, 265-281.
408	1.8	LA-ICP-MS	Zhou, B., et al., 2016. Geochemistry and zircon U-Pb geochronology of granitoids in the East Kunlun Orogenic Belt, northern Tibetan Plateau: origin and tectonic implications. Journal of Asian Earth Sciences, 130, 265-281.
191	1	LA-ICP-MS	Zongming Dai et al. 2011. U-Pb dating of zircons from the Four-Girl Mountain Pluton in the Songpan -Garz(e) Terrane, and the relationship between the pluton and the Wenchuan Ms 8.0 Earthquakeiof 2008.GEOLOGY IN CHINA.38(3)

## Sheet: Qilian Shan
ages (Ma)	2σ error	system	source
Qilian Shan Mountains
180	10	modified	Alex Pullen et al.2011. Qaidam Basin and northern Tibetan Plateau as dust sources for the Chinese Loess Plateau and paleoclimatic implications.GEOLOGY.v. 39 no. 11 p. 1031-1034
194	17	modified	Alex Pullen et al.2011. Qaidam Basin and northern Tibetan Plateau as dust sources for the Chinese Loess Plateau and paleoclimatic implications.GEOLOGY.v. 39 no. 11 p. 1031-1034
194.9	1	LA-ICP-MS	Jingen Dai et al.2013. Multi-stage tectono-magmatic events of the Eastern Kunlun Range, northern Tibet: Insights from U–Pb geochronology and (U–Th)/He thermochronology.Tectonophysics.Volume 599, 25 June 2013, Pages 97–106
198	56	modified	Alex Pullen et al.2011. Qaidam Basin and northern Tibetan Plateau as dust sources for the Chinese Loess Plateau and paleoclimatic implications.GEOLOGY.v. 39 no. 11 p. 1031-1034
199	3	modified	Alex Pullen et al.2011. Qaidam Basin and northern Tibetan Plateau as dust sources for the Chinese Loess Plateau and paleoclimatic implications.GEOLOGY.v. 39 no. 11 p. 1031-1034
201.8	3.8	SHRIMP	Rong Liu et al.2006. FORMATION TIME, PETROLOGY, GEOCHEMISTRY AND TECTONIC SETTING OF PERALUMINOUS GRANITES IN THE YUNWURIDE AREA, XINJIANG. Xinjiang Geology.2006,(3):223-228
202.2	3.4	TIMS	Dunpeng Li et al. 2007. Zircon TIMS U-Pb dating of the Qitaidaban granite in the West Kunlun Mountains and its thermal evolution history.Geology in China,2007,(6):1013-1021
203.3	4.1	SHRIMP	Rong Liu et al.2006. FORMATION TIME, PETROLOGY, GEOCHEMISTRY AND TECTONIC SETTING OF PERALUMINOUS GRANITES IN THE YUNWURIDE AREA, XINJIANG. Xinjiang Geology.2006,(3):223-228
204.1	2.6	SHRIMP	Yunhua Liu et al.2006.Zircon SHRIMP U-Pb dating of the Jingren granite, Yemaquan region of the east Kunlun and its geological significance Acta Petrologica Sinica.ACTA PETROLOGICA SINICA.
212	2	modified	Alex Pullen et al.2011. Qaidam Basin and northern Tibetan Plateau as dust sources for the Chinese Loess Plateau and paleoclimatic implications.GEOLOGY.v. 39 no. 11 p. 1031-1034
213	3	SHRIMP	Chao Yuan et al.2009.Garnet-bearing tonalitic porphyry from East Kunlun, Northeast Tibetan Plateau: implications for adakite and magmas from the MASH Zone.International Journal of Earth Sciences.September 2009, Volume 98, Issue 6, pp 1489-1510
215	1	modified	Alex Pullen et al.2011. Qaidam Basin and northern Tibetan Plateau as dust sources for the Chinese Loess Plateau and paleoclimatic implications.GEOLOGY.v. 39 no. 11 p. 1031-1034
218.3	1.4	LA-ICP-MS	Guochao Chen et al.2012.Zircon U Pb Geochronology Geochemical Characteristics and Geological Significance of Cocoe A'Long Quartz Diorites Body from the Hongshuichuan Area in East Kunlun.Acta Geologica Sinica.87(2):178-196
228	2.4	LA-ICP-MS	Jingen Dai et al.2013. Multi-stage tectono-magmatic events of the Eastern Kunlun Range, northern Tibet: Insights from U–Pb geochronology and (U–Th)/He thermochronology.Tectonophysics.Volume 599, 25 June 2013, Pages 97–106
228.2	1.5	SHRIMP	Chuanlin Zhang et al.2005. Dating of Triassic Granites in the Western Kunlun Mountains and Its Tectonic Significane[J].Acta Geologica Sinica,2005,(5):645-652
229	7	SHRIMP	Hong-Fei Zhang et al.2006. U–Pb zircon SHRIMP ages, geochemical and Sr–Nd–Pb isotopic compositions of intrusive rocks from the Longshan–Tianshui area in the southeast corner of the Qilian orogenic belt, China: Constraints on petrogenesis and tectonic affinity.Journal of Asian Earth Sciences.Volume 27, Issue 6, 1 October 2006, Pages 751–764.
229.6	0.8	LA-ICP-MS	Lei Tang et al.2012. LA-ICP-MS U-Pb Dating of the Zircon from Muztagata Pluton in Western Kunlun Orogenic Belt: Constraints on the Time of Paleotethys' Collision.Geological Review. 58(4):763-774
231		LA-ICP-MS	Jinyang Zhang et al.2012. Petrogenesis and tectonic significance of the Late Permian–Middle Triassic calc-alkaline granites in the Balong region, eastern Kunlun Orogen, China.Geological Magazine.v. 149 no. 5 p. 892-908
232.8	1.5	LA-ICP-MS	Lei Tang et al.2012. LA-ICP-MS U-Pb Dating of the Zircon from Muztagata Pluton in Western Kunlun Orogenic Belt: Constraints on the Time of Paleotethys' Collision.Geological Review. 58(4):763-774
234	1	LA-ICP MS	Xuanhua Chen et al.2012. Paleozoic and Mesozoic Basement Magmatisms of Eastern Qaidam Basin, Northern Qinghai-Tibet Plateau: LA-ICP-MS Zircon U-Pb Geochronology and its Geological Significance.Acta Geologica Sinica.Volume 86, Issue 2, pages 350–369
234.5	4.8	LA-ICP-MS	Zhongbao Song et al. Geochemical characteristics of Harizha granite diorite-porphyry in East Kunlun and their geological implications.Mineral Deposits.32(1):157-168.
239	6	SHRIMP	Chengdong Liu et al.2004.东昆仑壳-幔岩浆混合作用: 来自锆石SHRIMP年代学的证据. Chinese Science Bulletin. 49, 596-602.
239	1	LA-ICP MS	Xuanhua Chen et al.2012. Paleozoic and Mesozoic Basement Magmatisms of Eastern Qaidam Basin, Northern Qinghai-Tibet Plateau: LA-ICP-MS Zircon U-Pb Geochronology and its Geological Significance.Acta Geologica Sinica.Volume 86, Issue 2, pages 350–369
240	6	modified	Alex Pullen et al.2011. Qaidam Basin and northern Tibetan Plateau as dust sources for the Chinese Loess Plateau and paleoclimatic implications.GEOLOGY.v. 39 no. 11 p. 1031-1034
240	1	LA-ICP MS	Xuanhua Chen et al.2012. Paleozoic and Mesozoic Basement Magmatisms of Eastern Qaidam Basin, Northern Qinghai-Tibet Plateau: LA-ICP-MS Zircon U-Pb Geochronology and its Geological Significance.Acta Geologica Sinica.Volume 86, Issue 2, pages 350–369
240.5	1.8	SHRIMP	Chuanlin Zhang et al.2005. Dating of Triassic Granites in the Western Kunlun Mountains and Its Tectonic Significane[J].Acta Geologica Sinica,2005,(5):645-652
241	5	SHRIMP	Chengdong Liu et al.2004.东昆仑壳-幔岩浆混合作用: 来自锆石SHRIMP年代学的证据. Chinese Science Bulletin. 49, 596-602.
241		LA-ICP-MS	Jinyang Zhang et al.2012. Petrogenesis and tectonic significance of the Late Permian–Middle Triassic calc-alkaline granites in the Balong region, eastern Kunlun Orogen, China.Geological Magazine.v. 149 no. 5 p. 892-908
241	1	LA-ICP MS	Xuanhua Chen et al.2012. Paleozoic and Mesozoic Basement Magmatisms of Eastern Qaidam Basin, Northern Qinghai-Tibet Plateau: LA-ICP-MS Zircon U-Pb Geochronology and its Geological Significance.Acta Geologica Sinica.Volume 86, Issue 2, pages 350–369
241	1	LA-ICP MS	Xuanhua Chen et al.2012. Paleozoic and Mesozoic Basement Magmatisms of Eastern Qaidam Basin, Northern Qinghai-Tibet Plateau: LA-ICP-MS Zircon U-Pb Geochronology and its Geological Significance.Acta Geologica Sinica.Volume 86, Issue 2, pages 350–369
242	6	SHRIMP	Chengdong Liu et al.2004.东昆仑壳-幔岩浆混合作用: 来自锆石SHRIMP年代学的证据. Chinese Science Bulletin. 49, 596-602.
242	1	LA-ICP MS	Xuanhua Chen et al.2012. Paleozoic and Mesozoic Basement Magmatisms of Eastern Qaidam Basin, Northern Qinghai-Tibet Plateau: LA-ICP-MS Zircon U-Pb Geochronology and its Geological Significance.Acta Geologica Sinica.Volume 86, Issue 2, pages 350–369
243		LA-ICP-MS	Jinyang Zhang et al.2012. Petrogenesis and tectonic significance of the Late Permian–Middle Triassic calc-alkaline granites in the Balong region, eastern Kunlun Orogen, China.Geological Magazine.v. 149 no. 5 p. 892-908
243	1	LA-ICP MS	Xuanhua Chen et al.2012. Paleozoic and Mesozoic Basement Magmatisms of Eastern Qaidam Basin, Northern Qinghai-Tibet Plateau: LA-ICP-MS Zircon U-Pb Geochronology and its Geological Significance.Acta Geologica Sinica.Volume 86, Issue 2, pages 350–369
243.4	1.9	LA-ICP-MS	Chao Shi et al.2013. Determination of the age for the Xingshu valley gold mineralization spots in the eastern segment of Kunlun orogenic belt and the geochemical characteristics of its surrounding rocks.Chinese Journal of Geology. 48(4):984-996.
243.9	0.59	LA-ICP MS	Bile Li et al.2012. U-Pb dating and geochemistry of diorite in the eastern section from eastern Kunlun middle uplifted basement and granitic belt.Acta Petrologica Sinica,2012,28(4):1163-1172.
243.9	3	LA-ICP-MS	Guochao Chen et al.2012.Zircon U Pb Geochronology Geochemical Characteristics and Geological Significance of Cocoe A'Long Quartz Diorites Body from the Hongshuichuan Area in East Kunlun.Acta Geologica Sinica.87(2):178-196
244		LA-ICP-MS	Jinyang Zhang et al.2012. Petrogenesis and tectonic significance of the Late Permian–Middle Triassic calc-alkaline granites in the Balong region, eastern Kunlun Orogen, China.Geological Magazine.v. 149 no. 5 p. 892-908
245	1	LA-ICP MS	Xuanhua Chen et al.2012. Paleozoic and Mesozoic Basement Magmatisms of Eastern Qaidam Basin, Northern Qinghai-Tibet Plateau: LA-ICP-MS Zircon U-Pb Geochronology and its Geological Significance.Acta Geologica Sinica.Volume 86, Issue 2, pages 350–369
248	4	modified	Alex Pullen et al.2011. Qaidam Basin and northern Tibetan Plateau as dust sources for the Chinese Loess Plateau and paleoclimatic implications.GEOLOGY.v. 39 no. 11 p. 1031-1034
248	1	LA-ICP MS	Xuanhua Chen et al.2012. Paleozoic and Mesozoic Basement Magmatisms of Eastern Qaidam Basin, Northern Qinghai-Tibet Plateau: LA-ICP-MS Zircon U-Pb Geochronology and its Geological Significance.Acta Geologica Sinica.Volume 86, Issue 2, pages 350–369
250	7	modified	Alex Pullen et al.2011. Qaidam Basin and northern Tibetan Plateau as dust sources for the Chinese Loess Plateau and paleoclimatic implications.GEOLOGY.v. 39 no. 11 p. 1031-1034
250	1	LA-ICP MS	Xuanhua Chen et al.2012. Paleozoic and Mesozoic Basement Magmatisms of Eastern Qaidam Basin, Northern Qinghai-Tibet Plateau: LA-ICP-MS Zircon U-Pb Geochronology and its Geological Significance.Acta Geologica Sinica.Volume 86, Issue 2, pages 350–369
250.3	7.2	LA-ICP-MS	Eric Cowgill et al.2003. Reconstruction of the Altyn Tagh fault based on U-Pb geochronology: Role of back thrusts, mantle sutures, and heterogeneous crustal strength in forming the Tibetan Plateau.Journal of Geophysical.Volume 108, Issue B7, July 2003
251	2	LA-ICP-MS	Fujie Xiong et al.2011. LA-ICP-MS zircon U-Pb dating, elements and Sr-Nd-Hf isotope geochemistry of the Early Mesozoic mafic dyke swarms in East Kunlun orogenic belt.Acta Petrologica Sinica.27(11):3350-3364
251	1	LA-ICP MS	Xuanhua Chen et al.2012. Paleozoic and Mesozoic Basement Magmatisms of Eastern Qaidam Basin, Northern Qinghai-Tibet Plateau: LA-ICP-MS Zircon U-Pb Geochronology and its Geological Significance.Acta Geologica Sinica.Volume 86, Issue 2, pages 350–369
252		LA-ICP-MS	Jinyang Zhang et al.2012. Petrogenesis and tectonic significance of the Late Permian–Middle Triassic calc-alkaline granites in the Balong region, eastern Kunlun Orogen, China.Geological Magazine.v. 149 no. 5 p. 892-908
252	1	LA-ICP MS	Xuanhua Chen et al.2012. Paleozoic and Mesozoic Basement Magmatisms of Eastern Qaidam Basin, Northern Qinghai-Tibet Plateau: LA-ICP-MS Zircon U-Pb Geochronology and its Geological Significance.Acta Geologica Sinica.Volume 86, Issue 2, pages 350–369
253	1	LA-ICP MS	Xuanhua Chen et al.2012. Paleozoic and Mesozoic Basement Magmatisms of Eastern Qaidam Basin, Northern Qinghai-Tibet Plateau: LA-ICP-MS Zircon U-Pb Geochronology and its Geological Significance.Acta Geologica Sinica.Volume 86, Issue 2, pages 350–369
253	1	LA-ICP MS	Xuanhua Chen et al.2012. Paleozoic and Mesozoic Basement Magmatisms of Eastern Qaidam Basin, Northern Qinghai-Tibet Plateau: LA-ICP-MS Zircon U-Pb Geochronology and its Geological Significance.Acta Geologica Sinica.Volume 86, Issue 2, pages 350–369
255.3	3.6	LA-ICP-MS	Yu Sun et al.2009. Halagatu Magma Mixing Granite in the East Kunlun Mountains- Evidence from Zircon U-Pb Dating.ACTA GEOLOGICA SINICA.83(7):1000-1010
257	26	modified	Alex Pullen et al.2011. Qaidam Basin and northern Tibetan Plateau as dust sources for the Chinese Loess Plateau and paleoclimatic implications.GEOLOGY.v. 39 no. 11 p. 1031-1034
259.9	1.2	SHRIMP	Cailai Wu et al.2009. Geochemistry and zircon SHRIMP U-Pb dating of grani-toids from the west segment of the North Qaidam.SCIENCE CHINA Earth Sciences.52(11):1771-1790
268.7	1.6	LA-ICP-MS	Yanqian Yang et al.2013. Zircon U-Pb Ages and Its Geological Significance of the MonzoniticGranite in the Aikengdelesite, Eastern Kunlun.2013,Northwestern Geology.46(1):56-62
270	4	LA-MC-ICPMS	George E. Gehrels et al.2003.Magmatic history of the northeastern Tibetan Plateau.JOURNAL OF GEOPHYSICAL RESEARCH, VOL. 108, NO. B9, 2423
271.2	1.5	SHRIMP	Cailai Wu et al.2009. Geochemistry and zircon SHRIMP U-Pb dating of grani-toids from the west segment of the North Qaidam.SCIENCE CHINA Earth Sciences.52(11):1771-1790
272	2	LA-MC-ICPMS	George E. Gehrels et al.2003.Magmatic history of the northeastern Tibetan Plateau.JOURNAL OF GEOPHYSICAL RESEARCH, VOL. 108, NO. B9, 2423
272	8	LA-MC-ICPMS	George E. Gehrels et al.2003.Magmatic history of the northeastern Tibetan Plateau.JOURNAL OF GEOPHYSICAL RESEARCH, VOL. 108, NO. B9, 2423
277	6	modified	Alex Pullen et al.2011. Qaidam Basin and northern Tibetan Plateau as dust sources for the Chinese Loess Plateau and paleoclimatic implications.GEOLOGY.v. 39 no. 11 p. 1031-1034
290	4	modified	Alex Pullen et al.2011. Qaidam Basin and northern Tibetan Plateau as dust sources for the Chinese Loess Plateau and paleoclimatic implications.GEOLOGY.v. 39 no. 11 p. 1031-1034
290.4	3.6	LA-ICP-MS	Eric Cowgill et al.2003. Reconstruction of the Altyn Tagh fault based on U-Pb geochronology: Role of back thrusts, mantle sutures, and heterogeneous crustal strength in forming the Tibetan Plateau.Journal of Geophysical.Volume 108, Issue B7, July 2003
338	10	SHRIMP	Boqin Li et al. 2006. Characteristics and zircon SHRIMP U-Pb ages of the arc magmatic rocks in Mazar, southern Yecheng, West Kunlun Mountains.Geological Bulletin of China,2006,(1):124-132.
350.4	3.2	LA-ICP-MS	Qunzi Jia et al.2013. Zircon LA-MC-ICPMS U-Pb Dating and Geochemical Characteristics of the Plagiogranite Porphyry from Tanjianshan Gold Ore District in North Margin of Qaidam Basin.Geological Science and Technology Information.2013(1):87-93.
359	40	modified	Shunli Dong et al.2013. Progress of Studies on Early Paleozoic Tectonic Framework and Crystalline Rock Geochronology in Altun—Qilian—Kunlun Orogen.Geological Review.59(4):731-746
366	5	modified	Alex Pullen et al.2011. Qaidam Basin and northern Tibetan Plateau as dust sources for the Chinese Loess Plateau and paleoclimatic implications.GEOLOGY.v. 39 no. 11 p. 1031-1034
372	2.1	SHRIMP	Cailai Wu.2007.Zircon SHRIMP U-Pb dating of granites from the Da Qaidam area in the north margin of Qaidam basin, NW China.ACTA PETROLOGICA SINICA.23(8): 1861-1875
372.1	2.6	SHRIMP	Cailai Wu et al.2009. Geochemistry and zircon SHRIMP U-Pb dating of grani-toids from the west segment of the North Qaidam.SCIENCE CHINA Earth Sciences.52(11):1771-1790
374.5	1.6	SHRIMP	Cailai Wu.2007.Zircon SHRIMP U-Pb dating of granites from the Da Qaidam area in the north margin of Qaidam basin, NW China.ACTA PETROLOGICA SINICA.23(8): 1861-1875
374.5	1.6	modified	Shunli Dong et al.2013. Progress of Studies on Early Paleozoic Tectonic Framework and Crystalline Rock Geochronology in Altun—Qilian—Kunlun Orogen.Geological Review.59(4):731-746
384	2	modified	Alex Pullen et al.2011. Qaidam Basin and northern Tibetan Plateau as dust sources for the Chinese Loess Plateau and paleoclimatic implications.GEOLOGY.v. 39 no. 11 p. 1031-1034
384	1.9	modified	Shunli Dong et al.2013. Progress of Studies on Early Paleozoic Tectonic Framework and Crystalline Rock Geochronology in Altun—Qilian—Kunlun Orogen.Geological Review.59(4):731-746
388.8	5.2	LA-ICP-MS	Eric Cowgill et al.2003. Reconstruction of the Altyn Tagh fault based on U-Pb geochronology: Role of back thrusts, mantle sutures, and heterogeneous crustal strength in forming the Tibetan Plateau.Journal of Geophysical.Volume 108, Issue B7, July 2003
389	5	modified	Alex Pullen et al.2011. Qaidam Basin and northern Tibetan Plateau as dust sources for the Chinese Loess Plateau and paleoclimatic implications.GEOLOGY.v. 39 no. 11 p. 1031-1034
391.1	1.4	LA-ICP-MS	Guan Wang et al.2013. Zircon U-Pb Geochronology and Geochemistry of the Early Devonian Syenogranite in the Xiarihamu Ore District from East Kunlun, with Implications for the Geodynamic Setting.Geotectonica et Metallogenia.2013, (4):685-697
394	13	SHRIMP	Hongwei Chen et al.2004. SHRIMP ages of Kayakedengtage complex in the East Kunlun Mountains and their geological implications.ACTA PETROLOGICA ET MINERALOGICA25(1):25-32.
394	13	modified	Shunli Dong et al.2013. Progress of Studies on Early Paleozoic Tectonic Framework and Crystalline Rock Geochronology in Altun—Qilian—Kunlun Orogen.Geological Review.59(4):731-746
396	18	LA-ICP-MS	Xiaoping Long et al.2006. Zircon U-Pb geochronology and geological implications of the granitoids in Jinshuikou, East Kunlun, NW China.GEOCHIMICA. 35(4):367-376.
397	3	SHRIMP	Cailai Wu et al.2004. 柴达木北缘都兰野马滩花岗岩锆石SHRIMP定年. Chin. Sci. Bull. 16, 1667-1672.
397	3	SHRIMP	Cailai Wu et al.2004. Zircon U-Pb SHRIMP dating of the Yematan batholith in Dulan, North Qaidam, NW China.Chinese Science Bulletin.Volume 49, Issue 16, pp 1736-1740.
397	6	LA-ICP-MS	Shuguang Song et al.2005.Geochronology of diamond-bearing zircons from garnet peridotite in the North Qaidam UHPM belt, Northern Tibetan Plateau: A record of complex histories from oceanic lithosphere subduction to continental collision.Earth and Planetary Science Letters.Volume 234, Issues 1–2, 30 May 2005, Pages 99–118.
399	8	LA-ICP-MS	Shuguang Song et al.2005.Geochronology of diamond-bearing zircons from garnet peridotite in the North Qaidam UHPM belt, Northern Tibetan Plateau: A record of complex histories from oceanic lithosphere subduction to continental collision.Earth and Planetary Science Letters.Volume 234, Issues 1–2, 30 May 2005, Pages 99–118.
399.6	2.8	LA-MC-ICPMS	Lu Lu et al.2010. Zircon U-Pb age for rhyolite of the Maoniushan Formation and its tectonic significance in the East Kunlun Mountains.ACTA PETROLOGICA SINICA.26(4):1150-1158
401	6	SHRIMP	Yunhai Zhu et al.2005. 东昆仑造山带早古生代火山岩锆石SHRIMP年龄及其地质意义. Science in China(Series D). 35, 1112 - 1119.
401.8	3	SHRIMP	Cailai Wu.2007.Zircon SHRIMP U-Pb dating of granites from the Da Qaidam area in the north margin of Qaidam basin, NW China.ACTA PETROLOGICA SINICA.23(8): 1861-1875
402	24	SHRIMP	Bian, Q.T. et al. 2004. Age, geochemistry and tectonic setting of Buqingshan ophiolites, North Qinghai–Tibet Plateau, China. Journal of Asian Earth Sciences 23, 577–596.
402	6	SHRIMP	Jianxin Zhang et al.2003. Early Paleozoic tectono-thermal event of the Jinshuikou Group on the southern margin of Qaidam:Zircon U-Pb SHRIMP age evidence.GEOLOGICAL BULLETIN OF CHINA.22(6):397-404.
403	3	LA-ICP-MS	Bin Liu et al.2012. Petrogenesis of Early Devonian intrusive rocks in the east part of Eastern Kunlun Orogen and implication for Early Palaeozoic orogenic processes.Acta Petrologica Sinica.2012, (6):1785-1807
403	3	LA-ICP-MS	Bin Liu et al.2012. Petrogenesis of Early Devonian intrusive rocks in the east part of Eastern Kunlun Orogen and implication for Early Palaeozoic orogenic processes.Acta Petrologica Sinica.2012, (6):1785-1807
403	7	LA-ICP-MS	Bin Liu et al.2012. Petrogenesis of Early Devonian intrusive rocks in the east part of Eastern Kunlun Orogen and implication for Early Palaeozoic orogenic processes.Acta Petrologica Sinica.2012, (6):1785-1807
403	9	SHRIMP	shuguang Song et al.2006.Evolution from Oceanic Subduction to Continental Collision: a Case Study from the Northern Tibetan Plateau Based on Geochemical and Geochronological Data.Journal of Petrology.47(3),PAGES 435–455
403	7	SHRIMP	Xiao, WJ et al.2005. Accretionary tectonics of the Western Kunlun Orogen, China: A Paleozoic-Early Mesozoic, long-lived active continental margin with implications for the growth of Southern Eurasia.The Journal of Geology.2005, v. 113 n. 6, p. 687-705
403	3	LA-ICP-MS	Zhenming Zhao et al.2008. The Evidence of Intrusive Rocks about Collision-orogeny during Early Devonian in Eastern Kunlun Area.GEOLOGICAL REVIEW.54(1):1-11.
403.3	3.8	SHRIMP	Cailai Wu.2007.Zircon SHRIMP U-Pb dating of granites from the Da Qaidam area in the north margin of Qaidam basin, NW China.ACTA PETROLOGICA SINICA.23(8): 1861-1875
403.3	7.2	SHRIMP	Hongwei Chen et al.2004. SHRIMP ages of Kayakedengtage complex in the East Kunlun Mountains and their geological implications.ACTA PETROLOGICA ET MINERALOGICA25(1):25-32.
403.77	0.08	modified	Shunli Dong et al.2013. Progress of Studies on Early Paleozoic Tectonic Framework and Crystalline Rock Geochronology in Altun—Qilian—Kunlun Orogen.Geological Review.59(4):731-746
403.8	5.9	LA-ICP-MS	Eric Cowgill et al.2003. Reconstruction of the Altyn Tagh fault based on U-Pb geochronology: Role of back thrusts, mantle sutures, and heterogeneous crustal strength in forming the Tibetan Plateau.Journal of Geophysical.Volume 108, Issue B7, July 2003
404	6	modified	Alex Pullen et al.2011. Qaidam Basin and northern Tibetan Plateau as dust sources for the Chinese Loess Plateau and paleoclimatic implications.GEOLOGY.v. 39 no. 11 p. 1031-1034
404.7	9.8	SHRIMP	Xuexiang Qi et al.2005.SHRIMP U-Pb age of zircons from Kazisayi granite in the northern Alty Tagh mountains and its significations.ACTA PETROLOGICA SINICA.21(3): 859-866
404.9	4.8	LA-MC-ICPMS	Lu Lu et al.2010. Zircon U-Pb age for rhyolite of the Maoniushan Formation and its tectonic significance in the East Kunlun Mountains.ACTA PETROLOGICA SINICA.26(4):1150-1158
405	2	modified	Alex Pullen et al.2011. Qaidam Basin and northern Tibetan Plateau as dust sources for the Chinese Loess Plateau and paleoclimatic implications.GEOLOGY.v. 39 no. 11 p. 1031-1034
406	3	LA-ICP-MS	Bin Liu et al.2012. Petrogenesis of Early Devonian intrusive rocks in the east part of Eastern Kunlun Orogen and implication for Early Palaeozoic orogenic processes.Acta Petrologica Sinica.2012, (6):1785-1807
406	6	LA-ICP-MS	Bin Liu et al.2012. Petrogenesis of Early Devonian intrusive rocks in the east part of Eastern Kunlun Orogen and implication for Early Palaeozoic orogenic processes.Acta Petrologica Sinica.2012, (6):1785-1807
406	12	LA-MC-ICPMS	George E. Gehrels et al.2003.Magmatic history of the northeastern Tibetan Plateau.JOURNAL OF GEOPHYSICAL RESEARCH, VOL. 108, NO. B9, 2423
406.1	2.9	SHRIMP	Yaoling Zhang et al.2010. SHRIMP zircon U-Pb ages and tectonic significance of Maoniushan Formation volcanic rocks in East Kunlun orogenic belt, China.
407	3	LA-ICP-MS	Bin Liu et al.2012. Petrogenesis of Early Devonian intrusive rocks in the east part of Eastern Kunlun Orogen and implication for Early Palaeozoic orogenic processes.Acta Petrologica Sinica.2012, (6):1785-1807
407.7	7.5	LA-ICP-MS	Zhenming Zhao et al.2008. The Evidence of Intrusive Rocks about Collision-orogeny during Early Devonian in Eastern Kunlun Area.GEOLOGICAL REVIEW.54(1):1-11.
408	8	LA-ICP-MS	Bin Liu et al.2012. Petrogenesis of Early Devonian intrusive rocks in the east part of Eastern Kunlun Orogen and implication for Early Palaeozoic orogenic processes.Acta Petrologica Sinica.2012, (6):1785-1807
408	5	LA-ICP-MS	Bin Liu et al.2012. Petrogenesis of Early Devonian intrusive rocks in the east part of Eastern Kunlun Orogen and implication for Early Palaeozoic orogenic processes.Acta Petrologica Sinica.2012, (6):1785-1807
408	5	LA-ICP-MS	Bin Liu et al.2012. Petrogenesis of Early Devonian intrusive rocks in the east part of Eastern Kunlun Orogen and implication for Early Palaeozoic orogenic processes.Acta Petrologica Sinica.2012, (6):1785-1807
408	0.3	modified	Shunli Dong et al.2013. Progress of Studies on Early Paleozoic Tectonic Framework and Crystalline Rock Geochronology in Altun—Qilian—Kunlun Orogen.Geological Review.59(4):731-746
408	7	SHRIMP	Xiao, WJ et al.2005. Accretionary tectonics of the Western Kunlun Orogen, China: A Paleozoic-Early Mesozoic, long-lived active continental margin with implications for the growth of Southern Eurasia.The Journal of Geology.2005, v. 113 n. 6, p. 687-705
408.2	2.4	LA-MC-ICPMS	Lu Lu et al.2010. Zircon U-Pb age for rhyolite of the Maoniushan Formation and its tectonic significance in the East Kunlun Mountains.ACTA PETROLOGICA SINICA.26(4):1150-1158
408.3	5.3	LA-ICP-MS	Zhenming Zhao et al.2008. The Evidence of Intrusive Rocks about Collision-orogeny during Early Devonian in Eastern Kunlun Area.GEOLOGICAL REVIEW.54(1):1-11.
408.6	4.4	SHRIMP	Cailai Wu.2007.Zircon SHRIMP U-Pb dating of granites from the Da Qaidam area in the north margin of Qaidam basin, NW China.ACTA PETROLOGICA SINICA.23(8): 1861-1875
409	5	LA-ICP-MS	Bin Liu et al.2012. Petrogenesis of Early Devonian intrusive rocks in the east part of Eastern Kunlun Orogen and implication for Early Palaeozoic orogenic processes.Acta Petrologica Sinica.2012, (6):1785-1807
409	12	LA-ICP-MS	Jianxin Zhang et al.2009.U–Pb geochronology of paragneisses and metabasite in the Xitieshan area, north Qaidam Mountains, western China: Constraints on the exhumation of HP/UHP metamorphic rocks.Journal of Asian Earth Sciences.Volume 35, Issues 3–4, 1 July 2009, Pages 245–258
410	2	LA-ICP-MS	Bin Liu et al.2012. Petrogenesis of Early Devonian intrusive rocks in the east part of Eastern Kunlun Orogen and implication for Early Palaeozoic orogenic processes.Acta Petrologica Sinica.2012, (6):1785-1807
410.2	1.9	LA-ICP-MS	Zhenming Zhao et al.2008. The Evidence of Intrusive Rocks about Collision-orogeny during Early Devonian in Eastern Kunlun Area.GEOLOGICAL REVIEW.54(1):1-11.
411	2.8	modified	Shunli Dong et al.2013. Progress of Studies on Early Paleozoic Tectonic Framework and Crystalline Rock Geochronology in Altun—Qilian—Kunlun Orogen.Geological Review.59(4):731-746
411	17	LA-ICP-MS	Xiaoping Long et al.2006. Zircon U-Pb geochronology and geological implications of the granitoids in Jinshuikou, East Kunlun, NW China.GEOCHIMICA. 35(4):367-376.
411.3	1.8	LA-ICP-MS	Lei Kang et al.2013. Geochemistry,zircon U-Pb age and its geological significance of the gneissic granite from the eastern segment of the Tatelekebulake composite granite in the south Altyn Tagh.Acta Petrologica Sinica.29(9):3039-3048
413	14	LA-ICP-MS	Bin Liu et al.2012. Petrogenesis of Early Devonian intrusive rocks in the east part of Eastern Kunlun Orogen and implication for Early Palaeozoic orogenic processes.Acta Petrologica Sinica.2012, (6):1785-1807
413	5	LA-MC-ICPMS	George E. Gehrels et al.2003.Magmatic history of the northeastern Tibetan Plateau.JOURNAL OF GEOPHYSICAL RESEARCH, VOL. 108, NO. B9, 2423
413	14	LA-ICP-MS	Zhenming Zhao et al.2008. The Evidence of Intrusive Rocks about Collision-orogeny during Early Devonian in Eastern Kunlun Area.GEOLOGICAL REVIEW.54(1):1-11.
413.8	8	modified	Shunli Dong et al.2013. Progress of Studies on Early Paleozoic Tectonic Framework and Crystalline Rock Geochronology in Altun—Qilian—Kunlun Orogen.Geological Review.59(4):731-746
414.3		LA-ICP-MS	Junlu Chen et al.2008. Geochemical characters and LA-ICPMS zircon U-Pb dating constraints on the petrogenesis and tectonic setting of the Shichuan intrusion, east segment of the Central Qilian, NW China.ACTA PETROLOGICA SINICA.24(4):841-853
414.3	1.2	LA-ICP-MS	Shiping He et al. 2007 . LA-ICP-MS U-Pb Zircon Geochronology of Basic Dikes within Maxianshan Rock Group in the Central Qilian Orogenic Belt and Its Tectonic Implications. Journal of China University of Geosciences. 18(1):19–29.
417.7	2	LA-MC-ICPMS	Lu Lu et al.2013. Zircon U-Pb Dating of Early Paleozoic Granites from the East Kunlun Mountains and Its Geological Significance.Acta Geoscientia Sinica.Vol.34 No.4: 447-454
417.7	1.7	LA-ICP-MS	Xinmin Zhao et al.2014. Zircon U-Pb geochronology, geochemistry and petrogenesis of the granites from the Xiaoliugou deposit in the western of the North Qilian.Acta Petrologica Sinica,2014,30(1):16-34.
419	2	LA-MC-ICPMS	Lu Lu et al.2013. Zircon U-Pb Dating of Early Paleozoic Granites from the East Kunlun Mountains and Its Geological Significance.Acta Geoscientia Sinica.Vol.34 No.4: 447-454
419	5	SHRIMP	Yunhai Zhu et al.2005. 东昆仑造山带早古生代火山岩锆石SHRIMP年龄及其地质意义. Science in China(Series D). 35, 1112 - 1119.
419.7	2.3	LA-MC-ICPMS	Lu Lu et al.2013. Zircon U-Pb Dating of Early Paleozoic Granites from the East Kunlun Mountains and Its Geological Significance.Acta Geoscientia Sinica.Vol.34 No.4: 447-454
419.87	0.4	modified	Shunli Dong et al.2013. Progress of Studies on Early Paleozoic Tectonic Framework and Crystalline Rock Geochronology in Altun—Qilian—Kunlun Orogen.Geological Review.59(4):731-746
419.9	2	LA-MC-ICPMS	Lu Lu et al.2013. Zircon U-Pb Dating of Early Paleozoic Granites from the East Kunlun Mountains and Its Geological Significance.Acta Geoscientia Sinica.Vol.34 No.4: 447-454
420	5	modified	Shunli Dong et al.2013. Progress of Studies on Early Paleozoic Tectonic Framework and Crystalline Rock Geochronology in Altun—Qilian—Kunlun Orogen.Geological Review.59(4):731-746
420	5	LA-ICP-MS	Yunfei Ren et al., 2015, Petrology and geochronology of ultrahigh-pressure granitic gneiss from South Dulan, North Qaidam belt, NW China
421	5	modified	Shunli Dong et al.2013. Progress of Studies on Early Paleozoic Tectonic Framework and Crystalline Rock Geochronology in Altun—Qilian—Kunlun Orogen.Geological Review.59(4):731-746
421	6	modified	Shunli Dong et al.2013. Progress of Studies on Early Paleozoic Tectonic Framework and Crystalline Rock Geochronology in Altun—Qilian—Kunlun Orogen.Geological Review.59(4):731-746
421	55	LA-ICP-MS	Yunfei Ren et al., 2015, Petrology and geochronology of ultrahigh-pressure granitic gneiss from South Dulan, North Qaidam belt, NW China
421	7	LA-ICP-MS	Yunfei Ren et al., 2015, Petrology and geochronology of ultrahigh-pressure granitic gneiss from South Dulan, North Qaidam belt, NW China
422	6	LA-MC-ICPMS	George E. Gehrels et al.2003.Magmatic history of the northeastern Tibetan Plateau.JOURNAL OF GEOPHYSICAL RESEARCH, VOL. 108, NO. B9, 2423
422	2	LA-ICP-MS	J. X. ZHANG et al.2010. U–Pb zircon geochronology of coesite-bearing eclogites from the southern Dulan area of the North Qaidam UHP terrane, northwestern China: spatially and temporally extensive UHP metamorphism during continental subduction.Journal of Metamorphic Geology.Volume 28, Issue 9, pages 955–978.
422	4	modified	Shunli Dong et al.2013. Progress of Studies on Early Paleozoic Tectonic Framework and Crystalline Rock Geochronology in Altun—Qilian—Kunlun Orogen.Geological Review.59(4):731-746
422	13	LA-ICP-MS	Yunfei Ren et al., 2015, Petrology and geochronology of ultrahigh-pressure granitic gneiss from South Dulan, North Qaidam belt, NW China
422	4	LA-ICP-MS	Yunfei Ren et al., 2015, Petrology and geochronology of ultrahigh-pressure granitic gneiss from South Dulan, North Qaidam belt, NW China
423	6	LA-MC-ICPMS	George E. Gehrels et al.2003.Magmatic history of the northeastern Tibetan Plateau.JOURNAL OF GEOPHYSICAL RESEARCH, VOL. 108, NO. B9, 2423
423	6	LA-ICP-MS	J. X. ZHANG et al.2010. U–Pb zircon geochronology of coesite-bearing eclogites from the southern Dulan area of the North Qaidam UHP terrane, northwestern China: spatially and temporally extensive UHP metamorphism during continental subduction.Journal of Metamorphic Geology.Volume 28, Issue 9, pages 955–978.
423	12	LA-ICP-MS	Jianxin Zhang et al.2009.U–Pb geochronology of paragneisses and metabasite in the Xitieshan area, north Qaidam Mountains, western China: Constraints on the exhumation of HP/UHP metamorphic rocks.Journal of Asian Earth Sciences.Volume 35, Issues 3–4, 1 July 2009, Pages 245–258
423	5	LA-ICP-MS	Shuguang Song et al.2005.Geochronology of diamond-bearing zircons from garnet peridotite in the North Qaidam UHPM belt, Northern Tibetan Plateau: A record of complex histories from oceanic lithosphere subduction to continental collision.Earth and Planetary Science Letters.Volume 234, Issues 1–2, 30 May 2005, Pages 99–118.
423	6	SHRIMP	shuguang Song et al.2006.Evolution from Oceanic Subduction to Continental Collision: a Case Study from the Northern Tibetan Plateau Based on Geochemical and Geochronological Data.Journal of Petrology.47(3),PAGES 435–455
423	5	modified	Shunli Dong et al.2013. Progress of Studies on Early Paleozoic Tectonic Framework and Crystalline Rock Geochronology in Altun—Qilian—Kunlun Orogen.Geological Review.59(4):731-746
423	6	modified	Shunli Dong et al.2013. Progress of Studies on Early Paleozoic Tectonic Framework and Crystalline Rock Geochronology in Altun—Qilian—Kunlun Orogen.Geological Review.59(4):731-746
423	5	LA-ICP-MS	Yunfei Ren et al., 2015, Petrology and geochronology of ultrahigh-pressure granitic gneiss from South Dulan, North Qaidam belt, NW China
423	16	LA-ICP-MS	Yunfei Ren et al., 2015, Petrology and geochronology of ultrahigh-pressure granitic gneiss from South Dulan, North Qaidam belt, NW China
423	6	LA-ICP-MS	Yunfei Ren et al., 2015, Petrology and geochronology of ultrahigh-pressure granitic gneiss from South Dulan, North Qaidam belt, NW China
423.2	1.8	LA-MC-ICPMS	Lu Lu et al.2010. Zircon U-Pb age for rhyolite of the Maoniushan Formation and its tectonic significance in the East Kunlun Mountains.ACTA PETROLOGICA SINICA.26(4):1150-1158
424	4	LA-MC-ICPMS	George E. Gehrels et al.2003.Magmatic history of the northeastern Tibetan Plateau.JOURNAL OF GEOPHYSICAL RESEARCH, VOL. 108, NO. B9, 2423
424	13	LA-ICP-MS	Yunfei Ren et al., 2015, Petrology and geochronology of ultrahigh-pressure granitic gneiss from South Dulan, North Qaidam belt, NW China
425	3	LA-MC-ICPMS	George E. Gehrels et al.2003.Magmatic history of the northeastern Tibetan Plateau.JOURNAL OF GEOPHYSICAL RESEARCH, VOL. 108, NO. B9, 2423
425	3	modified	Shunli Dong et al.2013. Progress of Studies on Early Paleozoic Tectonic Framework and Crystalline Rock Geochronology in Altun—Qilian—Kunlun Orogen.Geological Review.59(4):731-746
425	4	LA-ICP-MS	Yunfei Ren et al., 2015, Petrology and geochronology of ultrahigh-pressure granitic gneiss from South Dulan, North Qaidam belt, NW China
425	14	LA-ICP-MS	Yunfei Ren et al., 2015, Petrology and geochronology of ultrahigh-pressure granitic gneiss from South Dulan, North Qaidam belt, NW China
425	8	LA-ICP-MS	Yunfei Ren et al., 2015, Petrology and geochronology of ultrahigh-pressure granitic gneiss from South Dulan, North Qaidam belt, NW China
425	9	LA-ICP-MS	Yunfei Ren et al., 2015, Petrology and geochronology of ultrahigh-pressure granitic gneiss from South Dulan, North Qaidam belt, NW China
425.9	2.6	LA-MC-ICP MS	Chunjing Zhou et al.ZIRCON U-Pb DATING OF THE RHYOLITE-DACITE PORPHYRY IN THE SANDAOWAN OF EAST KUNLUN MOUNTAINS AND ITS GEOLOGICAL SIGNIFICANCE.JOURNAL OF GEOMECHANICS.16(1):28-35.
426	4	LA-ICP-MS	J. X. ZHANG et al.2010. U–Pb zircon geochronology of coesite-bearing eclogites from the southern Dulan area of the North Qaidam UHP terrane, northwestern China: spatially and temporally extensive UHP metamorphism during continental subduction.Journal of Metamorphic Geology.Volume 28, Issue 9, pages 955–978.
426	15	LA-MC-ICPMS	Mingqiang Liu et al.2013. Single-grain zircon U-Pb ages and geological significance of the Lianhuashan granites from Wuwei (Gansu) in the Northern Qilian orogenic belt.Journal of Lanzhou University (Natural Sciences).2013, (4):448-452
426	41	modified	Shunli Dong et al.2013. Progress of Studies on Early Paleozoic Tectonic Framework and Crystalline Rock Geochronology in Altun—Qilian—Kunlun Orogen.Geological Review.59(4):731-746
426	4	LA-ICP-MS	Yunfei Ren et al., 2015, Petrology and geochronology of ultrahigh-pressure granitic gneiss from South Dulan, North Qaidam belt, NW China
426.5	2.4	LA-ICP-MS	Yunfei Ren et al., 2015, Petrology and geochronology of ultrahigh-pressure granitic gneiss from South Dulan, North Qaidam belt, NW China
427	4	modified	Shunli Dong et al.2013. Progress of Studies on Early Paleozoic Tectonic Framework and Crystalline Rock Geochronology in Altun—Qilian—Kunlun Orogen.Geological Review.59(4):731-746
427	10	LA-ICP-MS	Yunfei Ren et al., 2015, Petrology and geochronology of ultrahigh-pressure granitic gneiss from South Dulan, North Qaidam belt, NW China
427	8	LA-ICP-MS	Yunfei Ren et al., 2015, Petrology and geochronology of ultrahigh-pressure granitic gneiss from South Dulan, North Qaidam belt, NW China
427	8	LA-ICP-MS	Yunfei Ren et al., 2015, Petrology and geochronology of ultrahigh-pressure granitic gneiss from South Dulan, North Qaidam belt, NW China
427	8	LA-ICP-MS	Yunfei Ren et al., 2015, Petrology and geochronology of ultrahigh-pressure granitic gneiss from South Dulan, North Qaidam belt, NW China
428	19	SHRIMP	Chuanlin Zhang et al.2004. Zircon SHRIMP Age Determination of the Giant-crystal Gabbro and Basalt in K(u)da,West Kunlun:Dismembering of the K(u)da Ophiolite.GEOLOGICAL REVIEW.50(6):639-643.
428	2	LA-ICP-MS	Fancong Meng et al.2013. Discovery of Early Paleozoic eclogite from the East Kunlun, Western China and its tectonic significance.Gondwana Research.Volume 23, Issue 2, March 2013, Pages 825–836
428	2	SHRIMP	Shengyao Yu et al.2012. Geochemistry and zircon U-Pb ages of adakitic rocks from the Dulan area of the North Qaidam UHP terrane, north Tibet: Constraints on the timing and nature of regional tectonothermal events associated with collisional orogeny.Geochemistry and zircon U-Pb ages of adakitic rocks from the Dulan area of the North Qaidam UHP terrane, north Tibet: Constraints on the timing and na…
428	19	modified	Shunli Dong et al.2013. Progress of Studies on Early Paleozoic Tectonic Framework and Crystalline Rock Geochronology in Altun—Qilian—Kunlun Orogen.Geological Review.59(4):731-746
428.5	4.5	SHRIMP	Cailai Wu et al.2010. Early Palaezoic grranitoid magmatism and tectonic evolution in North Qilian, NW China.ACTA PETROLOGICA SINICA.26(4):1027-1044.
429	3	LA-ICP-MS	Yunfei Ren et al., 2015, Petrology and geochronology of ultrahigh-pressure granitic gneiss from South Dulan, North Qaidam belt, NW China
430	5	modified	Alex Pullen et al.2011. Qaidam Basin and northern Tibetan Plateau as dust sources for the Chinese Loess Plateau and paleoclimatic implications.GEOLOGY.v. 39 no. 11 p. 1031-1034
430	16	modified	Alex Pullen et al.2011. Qaidam Basin and northern Tibetan Plateau as dust sources for the Chinese Loess Plateau and paleoclimatic implications.GEOLOGY.v. 39 no. 11 p. 1031-1034
430	15.5	LA-ICP-MS	Eric Cowgill et al.2003. Reconstruction of the Altyn Tagh fault based on U-Pb geochronology: Role of back thrusts, mantle sutures, and heterogeneous crustal strength in forming the Tibetan Plateau.Journal of Geophysical.Volume 108, Issue B7, July 2003
430	4	LA-ICP-MS	J. X. ZHANG et al.2010. U–Pb zircon geochronology of coesite-bearing eclogites from the southern Dulan area of the North Qaidam UHP terrane, northwestern China: spatially and temporally extensive UHP metamorphism during continental subduction.Journal of Metamorphic Geology.Volume 28, Issue 9, pages 955–978.
430	4	LA-ICP-MS	Jianxin Zhang et al.2009.U–Pb geochronology of paragneisses and metabasite in the Xitieshan area, north Qaidam Mountains, western China: Constraints on the exhumation of HP/UHP metamorphic rocks.Journal of Asian Earth Sciences.Volume 35, Issues 3–4, 1 July 2009, Pages 245–258
430	5	LA-ICP-MS	Yunfei Ren et al., 2015, Petrology and geochronology of ultrahigh-pressure granitic gneiss from South Dulan, North Qaidam belt, NW China
430	14	LA-ICP-MS	Yunfei Ren et al., 2015, Petrology and geochronology of ultrahigh-pressure granitic gneiss from South Dulan, North Qaidam belt, NW China
430	4	LA-ICP-MS	Yunfei Ren et al., 2015, Petrology and geochronology of ultrahigh-pressure granitic gneiss from South Dulan, North Qaidam belt, NW China
430.7	2.6	SHRIMP	Jiantang Cui et al. 2007. Zircon SHRIMP U-Pb dating of Early Paleozoic granite in the Menggubao-Pushou area on the northern side of Kangxiwar, West Kunlun. Geological Bulletin of China,2007,(6):710-719
431	4	LA-ICP-MS	DanLing Chen et al.2007. In situ LA-ICP-MS zircon U-Pb age of ultrahigh-pressure eclogites in the Yukahe area, northern Qaidam Basin.Science in China Series D: Earth Sciences.November 2007, Volume 50, Issue 2 Supplement, pp 322-330
431	3	LA-ICP-MS	Danling Chen et al.2007. The Metamorphic Ages of the Country Rocks of the Yukahe Eclogites in the Northern Margin of Qaidam Basin and Its Geological Significance.Earth Science Frontiers.Volume 14, Issue 1, January 2007, Pages 108–116
431	8	SHRIMP	Fancong Meng et al.2008.Contemporaneous of Eady Palaeozoic granite and high temperature metamorphism,Nonh Qaidam Mountains,western China.ACTA PETROLOGICA SINICA.24(7)
431	5	LA-ICP-MS	J. X. ZHANG et al.2010. U–Pb zircon geochronology of coesite-bearing eclogites from the southern Dulan area of the North Qaidam UHP terrane, northwestern China: spatially and temporally extensive UHP metamorphism during continental subduction.Journal of Metamorphic Geology.Volume 28, Issue 9, pages 955–978.
431	4	LA-ICP-MS	Yunfei Ren et al., 2015, Petrology and geochronology of ultrahigh-pressure granitic gneiss from South Dulan, North Qaidam belt, NW China
431	3	LA-ICP-MS	Yunfei Ren et al., 2015, Petrology and geochronology of ultrahigh-pressure granitic gneiss from South Dulan, North Qaidam belt, NW China
431	5	LA-ICP-MS	Yunfei Ren et al., 2015, Petrology and geochronology of ultrahigh-pressure granitic gneiss from South Dulan, North Qaidam belt, NW China
431.1	3.8	SHRIMP	Cailai Wu et al.2005. Characteristics of the granitoid complex and its zircon SHRIMP dating at the south margin of the Bashikaogong Basin, North Altun, NW China.ACTA PETROLOGICA SINICA.21(3):846-858.
432	19	LA-ICP-MS	Danling Chen et al.2007. The Metamorphic Ages of the Country Rocks of the Yukahe Eclogites in the Northern Margin of Qaidam Basin and Its Geological Significance.Earth Science Frontiers.Volume 14, Issue 1, January 2007, Pages 108–116
432	19	LA-ICP-MS	Yunfei Ren et al., 2015, Petrology and geochronology of ultrahigh-pressure granitic gneiss from South Dulan, North Qaidam belt, NW China
432.1	3.2	LA-ICP-MS	Guobin Zhao et al.2013. LA-ICP-MS zircon U-Pb ages of Heishishan granite bodies in north Qilian and their geological significance.Geological Bulletin of China.32(10):1575-1583.
433	5	LA-ICP-MS	J. X. ZHANG et al.2010. U–Pb zircon geochronology of coesite-bearing eclogites from the southern Dulan area of the North Qaidam UHP terrane, northwestern China: spatially and temporally extensive UHP metamorphism during continental subduction.Journal of Metamorphic Geology.Volume 28, Issue 9, pages 955–978.
433	3	modified	Shunli Dong et al.2013. Progress of Studies on Early Paleozoic Tectonic Framework and Crystalline Rock Geochronology in Altun—Qilian—Kunlun Orogen.Geological Review.59(4):731-746
433	5	modified	Shunli Dong et al.2013. Progress of Studies on Early Paleozoic Tectonic Framework and Crystalline Rock Geochronology in Altun—Qilian—Kunlun Orogen.Geological Review.59(4):731-746
433	20	LA-ICP-MS	Yunfei Ren et al., 2015, Petrology and geochronology of ultrahigh-pressure granitic gneiss from South Dulan, North Qaidam belt, NW China
433	3	LA-ICP-MS	Yunfei Ren et al., 2015, Petrology and geochronology of ultrahigh-pressure granitic gneiss from South Dulan, North Qaidam belt, NW China
433	5	LA-ICP-MS	Yunfei Ren et al., 2015, Petrology and geochronology of ultrahigh-pressure granitic gneiss from South Dulan, North Qaidam belt, NW China
434	5	modified	Alex Pullen et al.2011. Qaidam Basin and northern Tibetan Plateau as dust sources for the Chinese Loess Plateau and paleoclimatic implications.GEOLOGY.v. 39 no. 11 p. 1031-1034
434	10	SHRIMP	Hong-Fei Zhang et al.2006. U–Pb zircon SHRIMP ages, geochemical and Sr–Nd–Pb isotopic compositions of intrusive rocks from the Longshan–Tianshui area in the southeast corner of the Qilian orogenic belt, China: Constraints on petrogenesis and tectonic affinity.Journal of Asian Earth Sciences.Volume 27, Issue 6, 1 October 2006, Pages 751–764.
434	1	LA-ICP-MS	Shiping He et al. 2007 . LA-ICP-MS U-Pb Zircon Geochronology of Basic Dikes within Maxianshan Rock Group in the Central Qilian Orogenic Belt and Its Tectonic Implications. Journal of China University of Geosciences. 18(1):19–29.
434	7	LA-ICP-MS	Yunfei Ren et al., 2015, Petrology and geochronology of ultrahigh-pressure granitic gneiss from South Dulan, North Qaidam belt, NW China
434.5	3.8	SHRIMP	Cailai Wu et al.2005. Characteristics of the granitoid complex and its zircon SHRIMP dating at the south margin of the Bashikaogong Basin, North Altun, NW China.ACTA PETROLOGICA SINICA.21(3):846-858.
434.7	3.5	SHRIMP	Qilongchen. 2009. The Petrology of Niuxinshan Granitoids in the North Qilian and Their Zircon SHRIMP Dating.
435	7	modified	Shunli Dong et al.2013. Progress of Studies on Early Paleozoic Tectonic Framework and Crystalline Rock Geochronology in Altun—Qilian—Kunlun Orogen.Geological Review.59(4):731-746
436	3	LA-ICP-MS	DanLing Chen et al.2007. In situ LA-ICP-MS zircon U-Pb age of ultrahigh-pressure eclogites in the Yukahe area, northern Qaidam Basin.Science in China Series D: Earth Sciences.November 2007, Volume 50, Issue 2 Supplement, pp 322-330
436	2	SHRIMP	Shengyao Yu et al.2012. Geochemistry and zircon U-Pb ages of adakitic rocks from the Dulan area of the North Qaidam UHP terrane, north Tibet: Constraints on the timing and nature of regional tectonothermal events associated with collisional orogeny.Geochemistry and zircon U-Pb ages of adakitic rocks from the Dulan area of the North Qaidam UHP terrane, north Tibet: Constraints on the timing and na…
436	1	modified	Zhao-Wei Zhang et al.2014. Sulfide mineralization associated with arc magmatism in the Qilian Block, western China: zircon U-Pb age and Sr-Nd-Os-S isotope constraints from the Yulonggou and Yaqu gabbroic intrusions.Mineralium Deposita.February 2014, Volum_x0000__x0000__x0000__x0000__x0000__x0000__x0000__x0000__x0000__x0000__x0000__x0000__x0000__x0000__x0000__x0000__x0003__x0000_d_x0000_d_x0000__x…
436	3	LA-ICP-MS	Yunfei Ren et al., 2015, Petrology and geochronology of ultrahigh-pressure granitic gneiss from South Dulan, North Qaidam belt, NW China
436.4	1.2	LA-ICP-MS	Junhu Ren et al.2009. LA-ICP-MS U-Pb zircon dating and geochemical characteristics of diabase-dykes from the Qingshuiquan area, eastern Kunlun orogenic belt.ACTA PETROLOGICA SINICA.25(5): 1135-1145
437	3	SHRIMP	Cailai Wu et al.2007. 北阿尔金巴什考供-斯米尔布拉克花岗杂岩特征及锆石SHRIMP U-Pb定年. Science in China(Series D). 37, 10-26.
437	3	SHRIMP	Shengyao Yu et al.2012. Geochemistry and zircon U-Pb ages of adakitic rocks from the Dulan area of the North Qaidam UHP terrane, north Tibet: Constraints on the timing and nature of regional tectonothermal events associated with collisional orogeny.Geochemistry and zircon U-Pb ages of adakitic rocks from the Dulan area of the North Qaidam UHP terrane, north Tibet: Constraints on the timing and na…
437	2	SHRIMP	Shengyao Yu et al.2012. Geochemistry and zircon U-Pb ages of adakitic rocks from the Dulan area of the North Qaidam UHP terrane, north Tibet: Constraints on the timing and nature of regional tectonothermal events associated with collisional orogeny.Geochemistry and zircon U-Pb ages of adakitic rocks from the Dulan area of the North Qaidam UHP terrane, north Tibet: Constraints on the timing and na…
437	14	modified	Shunli Dong et al.2013. Progress of Studies on Early Paleozoic Tectonic Framework and Crystalline Rock Geochronology in Altun—Qilian—Kunlun Orogen.Geological Review.59(4):731-746
437	6	modified	Shunli Dong et al.2013. Progress of Studies on Early Paleozoic Tectonic Framework and Crystalline Rock Geochronology in Altun—Qilian—Kunlun Orogen.Geological Review.59(4):731-746
437	16	modified	Shunli Dong et al.2013. Progress of Studies on Early Paleozoic Tectonic Framework and Crystalline Rock Geochronology in Altun—Qilian—Kunlun Orogen.Geological Review.59(4):731-746
437	6	LA-ICP-MS	Yunfei Ren et al., 2015, Petrology and geochronology of ultrahigh-pressure granitic gneiss from South Dulan, North Qaidam belt, NW China
438	2	LA-ICP-MS	J. X. ZHANG et al.2010. U–Pb zircon geochronology of coesite-bearing eclogites from the southern Dulan area of the North Qaidam UHP terrane, northwestern China: spatially and temporally extensive UHP metamorphism during continental subduction.Journal of Metamorphic Geology.Volume 28, Issue 9, pages 955–978.
438	2	LA-ICP-MS	Yunfei Ren et al., 2015, Petrology and geochronology of ultrahigh-pressure granitic gneiss from South Dulan, North Qaidam belt, NW China
438	4	LA-ICP-MS	Yunfei Ren et al., 2015, Petrology and geochronology of ultrahigh-pressure granitic gneiss from South Dulan, North Qaidam belt, NW China
439	8	LA-ICP-MS	Yunfei Ren et al., 2015, Petrology and geochronology of ultrahigh-pressure granitic gneiss from South Dulan, North Qaidam belt, NW China
439	8	LA-ICP-MS	Yunfei Ren et al., 2015, Petrology and geochronology of ultrahigh-pressure granitic gneiss from South Dulan, North Qaidam belt, NW China
439.6	6.8	LA-ICP-MS	Eric Cowgill et al.2003. Reconstruction of the Altyn Tagh fault based on U-Pb geochronology: Role of back thrusts, mantle sutures, and heterogeneous crustal strength in forming the Tibetan Plateau.Journal of Geophysical.Volume 108, Issue B7, July 2003
440	7	modified	Alex Pullen et al.2011. Qaidam Basin and northern Tibetan Plateau as dust sources for the Chinese Loess Plateau and paleoclimatic implications.GEOLOGY.v. 39 no. 11 p. 1031-1034
440	2.8	LA-ICP-MS	Guobin Zhao et al.2013. LA-ICP-MS zircon U-Pb ages of Heishishan granite bodies in north Qilian and their geological significance.Geological Bulletin of China.32(10):1575-1583.
440	17	LA-ICP-MS	J. X. ZHANG et al.2010. U–Pb zircon geochronology of coesite-bearing eclogites from the southern Dulan area of the North Qaidam UHP terrane, northwestern China: spatially and temporally extensive UHP metamorphism during continental subduction.Journal of Metamorphic Geology.Volume 28, Issue 9, pages 955–978.
440	6	LA-ICP-MS	J. X. ZHANG et al.2010. U–Pb zircon geochronology of coesite-bearing eclogites from the southern Dulan area of the North Qaidam UHP terrane, northwestern China: spatially and temporally extensive UHP metamorphism during continental subduction.Journal of Metamorphic Geology.Volume 28, Issue 9, pages 955–978.
440	1.7	LA-ICP-MS	Junlu Chen et al.2006. Zircon LA-ICPMS U-Pb age of mafic dykes in the area between the Qinling and the Qilian orogenic belts and its geological implications.ACTA PETROLOGICA ET MINERALOGICA.25(6):455-462
440	3	LA-ICP-MS	Qing Xiong et al.2012.Decoupling of U-Pb and Lu-Hf isotopes and trace elements in zircon from the UHP North Qaidam orogen, NE Tibet (China) : tracing the deep subduction of continental blocks.Lithos 155 (2012) 125–145
440	8	LA-ICP-MS	Qing Xiong et al.2012.Decoupling of U-Pb and Lu-Hf isotopes and trace elements in zircon from the UHP North Qaidam orogen, NE Tibet (China) : tracing the deep subduction of continental blocks.Lithos 155 (2012) 125–145
440	8	LA-ICP-MS	Qing Xiong et al.2012.Decoupling of U-Pb and Lu-Hf isotopes and trace elements in zircon from the UHP North Qaidam orogen, NE Tibet (China) : tracing the deep subduction of continental blocks.Lithos 155 (2012) 125–145
440	17	modified	Shunli Dong et al.2013. Progress of Studies on Early Paleozoic Tectonic Framework and Crystalline Rock Geochronology in Altun—Qilian—Kunlun Orogen.Geological Review.59(4):731-746
440	8	LA-ICP-MS	Yunfei Ren et al., 2015, Petrology and geochronology of ultrahigh-pressure granitic gneiss from South Dulan, North Qaidam belt, NW China
440	3	LA-ICP-MS	Yunfei Ren et al., 2015, Petrology and geochronology of ultrahigh-pressure granitic gneiss from South Dulan, North Qaidam belt, NW China
440	8	LA-ICP-MS	Yunfei Ren et al., 2015, Petrology and geochronology of ultrahigh-pressure granitic gneiss from South Dulan, North Qaidam belt, NW China
440	5	LA-ICP-MS	Yunfei Ren et al., 2015, Petrology and geochronology of ultrahigh-pressure granitic gneiss from South Dulan, North Qaidam belt, NW China
440	6	LA-ICP-MS	Yunfei Ren et al., 2015, Petrology and geochronology of ultrahigh-pressure granitic gneiss from South Dulan, North Qaidam belt, NW China
440.5	4.6	SHRIMP	Jiantang Cui et al.2006. Geological characteristics of Early Paleozoic amphibolite and tonalite in northern Kangxiwar, West Kunlun, China and their zircon SHRIMP U-Pb dating.GEOLOGICAL BULLETIN OF CHINA.
440.74	0.33	CA-ID-TIMS	Zhao-Wei Zhang et al.2014. Sulfide mineralization associated with arc magmatism in the Qilian Block, western China: zircon U-Pb age and Sr-Nd-Os-S isotope constraints from the Yulonggou and Yaqu gabbroic intrusions.Mineralium Deposita.February 2014, Volume 49, Issue 2, pp 279-292
441	5	modified	Alex Pullen et al.2011. Qaidam Basin and northern Tibetan Plateau as dust sources for the Chinese Loess Plateau and paleoclimatic implications.GEOLOGY.v. 39 no. 11 p. 1031-1034
441	2	LA-ICP-MS	Chao Wang et al.2013. Early Paleozoic magmatism in west Kunlun:Constraints from geochemical and zircon U-Pb-Hf isotopic studies of the Bulong granite.Chinese Journal of Geology.48(4):997-1014.
441	10	SHRIMP	Hong-Fei Zhang et al.2006. U–Pb zircon SHRIMP ages, geochemical and Sr–Nd–Pb isotopic compositions of intrusive rocks from the Longshan–Tianshui area in the southeast corner of the Qilian orogenic belt, China: Constraints on petrogenesis and tectonic affinity.Journal of Asian Earth Sciences.Volume 27, Issue 6, 1 October 2006, Pages 751–764.
441	5	LA-ICP-MS	Qing Xiong et al.2012.Decoupling of U-Pb and Lu-Hf isotopes and trace elements in zircon from the UHP North Qaidam orogen, NE Tibet (China) : tracing the deep subduction of continental blocks.Lithos 155 (2012) 125–145
441	5	SHRIMP	Xiaoxia Wang et al.2012.Late Ordovician Wanbaogou granitoid pluton from the southern margin of the Qaidam basin: Zircon SHRIMP U-Pb age, Hf isotope and geochemistry.Acta Petrologica Sinica.28(9): 2950-2962
441	1	modified	Zhao-Wei Zhang et al.2014. Sulfide mineralization associated with arc magmatism in the Qilian Block, western China: zircon U-Pb age and Sr-Nd-Os-S isotope constraints from the Yulonggou and Yaqu gabbroic intrusions.Mineralium Deposita.February 2014, Volum_x0000__x0000__x0000__x0000__x0000__x0000__x0000__x0000__x0000__x0000__x0000__x0000__x0000__x0000__x0000__x0000__x0003__x0000_d_x0000_d_x0000__x…
441	5	LA-ICP-MS	Yunfei Ren et al., 2015, Petrology and geochronology of ultrahigh-pressure granitic gneiss from South Dulan, North Qaidam belt, NW China
441	15	LA-ICP-MS	Yunfei Ren et al., 2015, Petrology and geochronology of ultrahigh-pressure granitic gneiss from South Dulan, North Qaidam belt, NW China
441.1	1.4	LA-ICP-MS	Shiping He et al. 2007 . LA-ICP-MS U-Pb Zircon Geochronology of Basic Dikes within Maxianshan Rock Group in the Central Qilian Orogenic Belt and Its Tectonic Implications. Journal of China University of Geosciences. 18(1):19–29.
442	4	LA-MC-ICPMS	George E. Gehrels et al.2003.Magmatic history of the northeastern Tibetan Plateau.JOURNAL OF GEOPHYSICAL RESEARCH, VOL. 108, NO. B9, 2423
442	4	LA-ICP-MS	J. X. ZHANG et al.2010. U–Pb zircon geochronology of coesite-bearing eclogites from the southern Dulan area of the North Qaidam UHP terrane, northwestern China: spatially and temporally extensive UHP metamorphism during continental subduction.Journal of Metamorphic Geology.Volume 28, Issue 9, pages 955–978.
442	4	modified	Shunli Dong et al.2013. Progress of Studies on Early Paleozoic Tectonic Framework and Crystalline Rock Geochronology in Altun—Qilian—Kunlun Orogen.Geological Review.59(4):731-746
442.1	6.7	SHRIMP	Cailai Wu.2004. 北阿尔金斯米尔布拉克凹陷南带花岗杂岩特征及锆石SHRIMP定年. 2004年全国岩石学与地球动力学研讨会论文摘要集.
442.1	8.8	modified	Shunli Dong et al.2013. Progress of Studies on Early Paleozoic Tectonic Framework and Crystalline Rock Geochronology in Altun—Qilian—Kunlun Orogen.Geological Review.59(4):731-746
442.8	1.1	LA-ICP-MS	Junlu Chen et al.2006. Zircon LA-ICPMS U-Pb age of mafic dykes in the area between the Qinling and the Qilian orogenic belts and its geological implications.ACTA PETROLOGICA ET MINERALOGICA.25(6):455-462
443	11	SHRIMP	Cailai Wu et al.2007. 北阿尔金巴什考供-斯米尔布拉克花岗杂岩特征及锆石SHRIMP U-Pb定年. Science in China(Series D). 37, 10-26.
443	4	LA-ICP-MS	Qing Xiong et al.2012.Decoupling of U-Pb and Lu-Hf isotopes and trace elements in zircon from the UHP North Qaidam orogen, NE Tibet (China) : tracing the deep subduction of continental blocks.Lithos 155 (2012) 125–145
443	5	modified	Shunli Dong et al.2013. Progress of Studies on Early Paleozoic Tectonic Framework and Crystalline Rock Geochronology in Altun—Qilian—Kunlun Orogen.Geological Review.59(4):731-746
443	4	modified	Shunli Dong et al.2013. Progress of Studies on Early Paleozoic Tectonic Framework and Crystalline Rock Geochronology in Altun—Qilian—Kunlun Orogen.Geological Review.59(4):731-746
443	1	modified	Zhao-Wei Zhang et al.2014. Sulfide mineralization associated with arc magmatism in the Qilian Block, western China: zircon U-Pb age and Sr-Nd-Os-S isotope constraints from the Yulonggou and Yaqu gabbroic intrusions.Mineralium Deposita.February 2014, Volum_x0000__x0000__x0000__x0000__x0000__x0000__x0000__x0000__x0000__x0000__x0000__x0000__x0000__x0000__x0000__x0000__x0003__x0000_d_x0000_d_x0000__x…
443	4	LA-ICP-MS	Yunfei Ren et al., 2015, Petrology and geochronology of ultrahigh-pressure granitic gneiss from South Dulan, North Qaidam belt, NW China
443.1	2.3	SHRIMP	Jiantang Cui et al. 2007. Zircon SHRIMP U-Pb dating of Early Paleozoic granite in the Menggubao-Pushou area on the northern side of Kangxiwar, West Kunlun. Geological Bulletin of China,2007,(6):710-719
443.39	0.42	CA-ID-TIMS	Zhao-Wei Zhang et al.2014. Sulfide mineralization associated with arc magmatism in the Qilian Block, western China: zircon U-Pb age and Sr-Nd-Os-S isotope constraints from the Yulonggou and Yaqu gabbroic intrusions.Mineralium Deposita.February 2014, Volume 49, Issue 2, pp 279-292
443.5	3.6	SHRIMP	Cailai Wu et al.2009. Geochemistry and zircon SHRIMP U-Pb dating of grani-toids from the west segment of the North Qaidam.SCIENCE CHINA Earth Sciences.52(11):1771-1790
443.8	6.5	LA-ICP-MS	Eric Cowgill et al.2003. Reconstruction of the Altyn Tagh fault based on U-Pb geochronology: Role of back thrusts, mantle sutures, and heterogeneous crustal strength in forming the Tibetan Plateau.Journal of Geophysical.Volume 108, Issue B7, July 2003
444	7	modified	Alex Pullen et al.2011. Qaidam Basin and northern Tibetan Plateau as dust sources for the Chinese Loess Plateau and paleoclimatic implications.GEOLOGY.v. 39 no. 11 p. 1031-1034
444	17	LA-MC-ICPMS	Jianping Su et al.2004. U-Pb ZIRCON DATING AND GENESIS OF THE HEIGOULIANGZI GRANITIC INTRUSION IN THE WESTERN SEGMENT OF THE MIDDLE QILIAN MOUNTAINS.GEOSCIENCE.2004,(1):70-74
444.6		LA-ICP-MS	Junlu Chen et al.2008. Geochemical characters and LA-ICPMS zircon U-Pb dating constraints on the petrogenesis and tectonic setting of the Shichuan intrusion, east segment of the Central Qilian, NW China.ACTA PETROLOGICA SINICA.24(4):841-853
444.9	1.3	modified	Shunli Dong et al.2013. Progress of Studies on Early Paleozoic Tectonic Framework and Crystalline Rock Geochronology in Altun—Qilian—Kunlun Orogen.Geological Review.59(4):731-746
444.9	0.7	modified	Shunli Dong et al.2013. Progress of Studies on Early Paleozoic Tectonic Framework and Crystalline Rock Geochronology in Altun—Qilian—Kunlun Orogen.Geological Review.59(4):731-746
445	7	SHRIMP	Guibin Zhang et al.2008. The subducted oceanic crust within continental-type UHP metamorphic belt in the North Qaidam, NW China: Evidence from petrology,geochemistry and geochronology.Lithos 104 (2008) 99–118
445	7	LA-ICP-MS	J. X. ZHANG et al.2010. U–Pb zircon geochronology of coesite-bearing eclogites from the southern Dulan area of the North Qaidam UHP terrane, northwestern China: spatially and temporally extensive UHP metamorphism during continental subduction.Journal of Metamorphic Geology.Volume 28, Issue 9, pages 955–978.
445	7	LA-ICP-MS	Yunfei Ren et al., 2015, Petrology and geochronology of ultrahigh-pressure granitic gneiss from South Dulan, North Qaidam belt, NW China
445	6	LA-ICP-MS	Yunfei Ren et al., 2015, Petrology and geochronology of ultrahigh-pressure granitic gneiss from South Dulan, North Qaidam belt, NW China
446	2.2	LA-MC-ICPMS	Guocan Wang et al. 2003. Late Caledonian Ductile Thrusting Deformation in the Central East Kunlun Belt, Qinghai, China and Its Significance: Evidence from Geochronology.Volume 77, Issue 3, pages 311–319
446	10	LA-ICP-MS	J. X. ZHANG et al.2010. U–Pb zircon geochronology of coesite-bearing eclogites from the southern Dulan area of the North Qaidam UHP terrane, northwestern China: spatially and temporally extensive UHP metamorphism during continental subduction.Journal of Metamorphic Geology.Volume 28, Issue 9, pages 955–978.
446	3	LA-ICP-MS	J. X. ZHANG et al.2010. U–Pb zircon geochronology of coesite-bearing eclogites from the southern Dulan area of the North Qaidam UHP terrane, northwestern China: spatially and temporally extensive UHP metamorphism during continental subduction.Journal of Metamorphic Geology.Volume 28, Issue 9, pages 955–978.
446	3	modified	Shunli Dong et al.2013. Progress of Studies on Early Paleozoic Tectonic Framework and Crystalline Rock Geochronology in Altun—Qilian—Kunlun Orogen.Geological Review.59(4):731-746
446	10	LA-ICP-MS	Yunfei Ren et al., 2015, Petrology and geochronology of ultrahigh-pressure granitic gneiss from South Dulan, North Qaidam belt, NW China
446	3	LA-ICP-MS	Yunfei Ren et al., 2015, Petrology and geochronology of ultrahigh-pressure granitic gneiss from South Dulan, North Qaidam belt, NW China
446.3	3.9	SHRIMP	Cailai Wu.2007.Zircon SHRIMP U-Pb dating of granites from the Da Qaidam area in the north margin of Qaidam basin, NW China.ACTA PETROLOGICA SINICA.23(8): 1861-1875
446.4	2.2	LA-ICP-MS	Xiaofei Yu et al.2011. Caledonian diagenetic and metallogenicevents in Datong district in the western Kunlun: Evidences from LA-ICP-MS zircon U-Pb dating and molybdenite Re-Os dating.Acta Petrologica Sinica.27(6):1770-1778
446.5	9.1	modified	Shunli Dong et al.2013. Progress of Studies on Early Paleozoic Tectonic Framework and Crystalline Rock Geochronology in Altun—Qilian—Kunlun Orogen.Geological Review.59(4):731-746
446.5	1.5	LA-ICP-MS	Yong Yong et al.2008. Geochronology and geochemistry of Paleozoic granitic plutons friom the eastern Central Qilian and their tectonic implications.ACTA PETROLOGICA SINICA.24(4):855-866
446.6	5.2	SHRIMP	Cailai Wu et al.2005. Characteristics of the granitoid complex and its zircon SHRIMP dating at the south margin of the Bashikaogong Basin, North Altun, NW China.ACTA PETROLOGICA SINICA.21(3):846-858.
447	7	SHRIMP	Jiantang Cui et al.2006. Geological characteristics of Early Paleozoic quartz diorite in the vicinity of Kangxiwar, West Kuniun, China and its zircon SHRIMP U-Pb dating.Geological Bulletin of China,2006,(12):1450-1457.
447	3	modified	Shunli Dong et al.2013. Progress of Studies on Early Paleozoic Tectonic Framework and Crystalline Rock Geochronology in Altun—Qilian—Kunlun Orogen.Geological Review.59(4):731-746
447	22	modified	Shunli Dong et al.2013. Progress of Studies on Early Paleozoic Tectonic Framework and Crystalline Rock Geochronology in Altun—Qilian—Kunlun Orogen.Geological Review.59(4):731-746
447	2	LA-ICP-MS	Yunfei Ren et al., 2015, Petrology and geochronology of ultrahigh-pressure granitic gneiss from South Dulan, North Qaidam belt, NW China
447.4	3.5	modified	Shunli Dong et al.2013. Progress of Studies on Early Paleozoic Tectonic Framework and Crystalline Rock Geochronology in Altun—Qilian—Kunlun Orogen.Geological Review.59(4):731-746
447.5	8.9	modified	Shunli Dong et al.2013. Progress of Studies on Early Paleozoic Tectonic Framework and Crystalline Rock Geochronology in Altun—Qilian—Kunlun Orogen.Geological Review.59(4):731-746
447.6	12.3	LA-ICP-MS	Eric Cowgill et al.2003. Reconstruction of the Altyn Tagh fault based on U-Pb geochronology: Role of back thrusts, mantle sutures, and heterogeneous crustal strength in forming the Tibetan Plateau.Journal of Geophysical.Volume 108, Issue B7, July 2003
448	12	modified	Alex Pullen et al.2011. Qaidam Basin and northern Tibetan Plateau as dust sources for the Chinese Loess Plateau and paleoclimatic implications.GEOLOGY.v. 39 no. 11 p. 1031-1034
448	13	modified	Shunli Dong et al.2013. Progress of Studies on Early Paleozoic Tectonic Framework and Crystalline Rock Geochronology in Altun—Qilian—Kunlun Orogen.Geological Review.59(4):731-746
448	4	modified	Shunli Dong et al.2013. Progress of Studies on Early Paleozoic Tectonic Framework and Crystalline Rock Geochronology in Altun—Qilian—Kunlun Orogen.Geological Review.59(4):731-746
448.6	3.3	TIMS	Qunye Xiu et al. 2007. Geology and Zircon U-Pb Age of Pillow Basalt at Qiashikansoy in Northern Altun Tagh, W China.ACTA GEOLOGICA SINICA.81(6):787-794
448.6	1.1	modified	Shunli Dong et al.2013. Progress of Studies on Early Paleozoic Tectonic Framework and Crystalline Rock Geochronology in Altun—Qilian—Kunlun Orogen.Geological Review.59(4):731-746
448.7	2.3	LA-ICP-MS	Xiaofei Yu et al.2011. Caledonian diagenetic and metallogenicevents in Datong district in the western Kunlun: Evidences from LA-ICP-MS zircon U-Pb dating and molybdenite Re-Os dating.Acta Petrologica Sinica.27(6):1770-1778
449	2	LA-ICP-MS	J. X. ZHANG et al.2010. U–Pb zircon geochronology of coesite-bearing eclogites from the southern Dulan area of the North Qaidam UHP terrane, northwestern China: spatially and temporally extensive UHP metamorphism during continental subduction.Journal of Metamorphic Geology.Volume 28, Issue 9, pages 955–978.
449	2	modified	Shunli Dong et al.2013. Progress of Studies on Early Paleozoic Tectonic Framework and Crystalline Rock Geochronology in Altun—Qilian—Kunlun Orogen.Geological Review.59(4):731-746
449	1	modified	Zhao-Wei Zhang et al.2014. Sulfide mineralization associated with arc magmatism in the Qilian Block, western China: zircon U-Pb age and Sr-Nd-Os-S isotope constraints from the Yulonggou and Yaqu gabbroic intrusions.Mineralium Deposita.February 2014, Volum_x0000__x0000__x0000__x0000__x0000__x0000__x0000__x0000__x0000__x0000__x0000__x0000__x0000__x0000__x0000__x0000__x0003__x0000_d_x0000_d_x0000__x…
449	8	LA-ICP-MS	Yunfei Ren et al., 2015, Petrology and geochronology of ultrahigh-pressure granitic gneiss from South Dulan, North Qaidam belt, NW China
449	2	LA-ICP-MS	Yunfei Ren et al., 2015, Petrology and geochronology of ultrahigh-pressure granitic gneiss from South Dulan, North Qaidam belt, NW China
449.7	5.8	modified	Shunli Dong et al.2013. Progress of Studies on Early Paleozoic Tectonic Framework and Crystalline Rock Geochronology in Altun—Qilian—Kunlun Orogen.Geological Review.59(4):731-746
450	4	modified	Shunli Dong et al.2013. Progress of Studies on Early Paleozoic Tectonic Framework and Crystalline Rock Geochronology in Altun—Qilian—Kunlun Orogen.Geological Review.59(4):731-746
450	7	modified	Shunli Dong et al.2013. Progress of Studies on Early Paleozoic Tectonic Framework and Crystalline Rock Geochronology in Altun—Qilian—Kunlun Orogen.Geological Review.59(4):731-746
450	11	LA-ICP-MS	Yunfei Ren et al., 2015, Petrology and geochronology of ultrahigh-pressure granitic gneiss from South Dulan, North Qaidam belt, NW China
450.9	4	modified	Shunli Dong et al.2013. Progress of Studies on Early Paleozoic Tectonic Framework and Crystalline Rock Geochronology in Altun—Qilian—Kunlun Orogen.Geological Review.59(4):731-746
451	6	LA-ICP-MS	Jianxin Zhang et al.2009.U–Pb geochronology of paragneisses and metabasite in the Xitieshan area, north Qaidam Mountains, western China: Constraints on the exhumation of HP/UHP metamorphic rocks.Journal of Asian Earth Sciences.Volume 35, Issues 3–4, 1 July 2009, Pages 245–258
451	1.7	LA-ICP-MS	Lei Kang et al.2013. Geochemistry,zircon U-Pb age and its geological significance of the gneissic granite from the eastern segment of the Tatelekebulake composite granite in the south Altyn Tagh.Acta Petrologica Sinica.29(9):3039-3048
451	6	LA-ICP-MS	Yunfei Ren et al., 2015, Petrology and geochronology of ultrahigh-pressure granitic gneiss from South Dulan, North Qaidam belt, NW China
451	17	LA-ICP-MS	Yunfei Ren et al., 2015, Petrology and geochronology of ultrahigh-pressure granitic gneiss from South Dulan, North Qaidam belt, NW China
451.6	8.2	LA-ICP-MS	Eric Cowgill et al.2003. Reconstruction of the Altyn Tagh fault based on U-Pb geochronology: Role of back thrusts, mantle sutures, and heterogeneous crustal strength in forming the Tibetan Plateau.Journal of Geophysical.Volume 108, Issue B7, July 2003
452	8	modified	Alex Pullen et al.2011. Qaidam Basin and northern Tibetan Plateau as dust sources for the Chinese Loess Plateau and paleoclimatic implications.GEOLOGY.v. 39 no. 11 p. 1031-1034
452	7	modified	Alex Pullen et al.2011. Qaidam Basin and northern Tibetan Plateau as dust sources for the Chinese Loess Plateau and paleoclimatic implications.GEOLOGY.v. 39 no. 11 p. 1031-1034
452	12	LA-ICP-MS	Jianxin Zhang et al.2009.U–Pb geochronology of paragneisses and metabasite in the Xitieshan area, north Qaidam Mountains, western China: Constraints on the exhumation of HP/UHP metamorphic rocks.Journal of Asian Earth Sciences.Volume 35, Issues 3–4, 1 July 2009, Pages 245–258
452	12	LA-ICP-MS	Yunfei Ren et al., 2015, Petrology and geochronology of ultrahigh-pressure granitic gneiss from South Dulan, North Qaidam belt, NW China
452	14	LA-ICP-MS	Yunfei Ren et al., 2015, Petrology and geochronology of ultrahigh-pressure granitic gneiss from South Dulan, North Qaidam belt, NW China
452.8	3.1	LA-ICP-MS	Wenqiang Yang et al. 2012. Geochemistry, geochronology and zircon Hf isotopes of the Dimunalike granite in South Altyn Tagn and its geological significance.Acta Petrologica Sinica. 28(12): 4139-4150
453.4	8.7	modified	Shunli Dong et al.2013. Progress of Studies on Early Paleozoic Tectonic Framework and Crystalline Rock Geochronology in Altun—Qilian—Kunlun Orogen.Geological Review.59(4):731-746
453.56	4.44	modified	Shunli Dong et al.2013. Progress of Studies on Early Paleozoic Tectonic Framework and Crystalline Rock Geochronology in Altun—Qilian—Kunlun Orogen.Geological Review.59(4):731-746
454	6	modified	Shunli Dong et al.2013. Progress of Studies on Early Paleozoic Tectonic Framework and Crystalline Rock Geochronology in Altun—Qilian—Kunlun Orogen.Geological Review.59(4):731-746
454	2	LA-ICP-MS	Xinmin Zhao et al.2014. Zircon U-Pb geochronology, geochemistry and petrogenesis of the granites from the Xiaoliugou deposit in the western of the North Qilian.Acta Petrologica Sinica,2014,30(1):16-34.
454	5	LA-ICP-MS	Yong Yong et al.2008. Geochronology and geochemistry of Paleozoic granitic plutons friom the eastern Central Qilian and their tectonic implications.ACTA PETROLOGICA SINICA.24(4):855-866
455	5	modified	Alex Pullen et al.2011. Qaidam Basin and northern Tibetan Plateau as dust sources for the Chinese Loess Plateau and paleoclimatic implications.GEOLOGY.v. 39 no. 11 p. 1031-1034
455	2	Ar-Ar	Jie Hao et al.2006. Jinyanshan collisional oroginic belt of the early Paleozoic in the Altun mountains: evidence from single zircon U-Pb and 40Ar/39Ar isotopic dating for the arc magmatite and ophiolitic mélange.ACTA PETROLOGICA SINICA.22(11)：22(11): 2743-2752
455	1	modified	Shunli Dong et al.2013. Progress of Studies on Early Paleozoic Tectonic Framework and Crystalline Rock Geochronology in Altun—Qilian—Kunlun Orogen.Geological Review.59(4):731-746
455	1	modified	Zhao-Wei Zhang et al.2014. Sulfide mineralization associated with arc magmatism in the Qilian Block, western China: zircon U-Pb age and Sr-Nd-Os-S isotope constraints from the Yulonggou and Yaqu gabbroic intrusions.Mineralium Deposita.February 2014, Volum_x0000__x0000__x0000__x0000__x0000__x0000__x0000__x0000__x0000__x0000__x0000__x0000__x0000__x0000__x0000__x0000__x0003__x0000_d_x0000_d_x0000__x…
455.1	9.9	modified	Shunli Dong et al.2013. Progress of Studies on Early Paleozoic Tectonic Framework and Crystalline Rock Geochronology in Altun—Qilian—Kunlun Orogen.Geological Review.59(4):731-746
455.6	14.9	LA-ICP-MS	Eric Cowgill et al.2003. Reconstruction of the Altyn Tagh fault based on U-Pb geochronology: Role of back thrusts, mantle sutures, and heterogeneous crustal strength in forming the Tibetan Plateau.Journal of Geophysical.Volume 108, Issue B7, July 2003
456.6	6.3	LA-ICP-MS	Eric Cowgill et al.2003. Reconstruction of the Altyn Tagh fault based on U-Pb geochronology: Role of back thrusts, mantle sutures, and heterogeneous crustal strength in forming the Tibetan Plateau.Journal of Geophysical.Volume 108, Issue B7, July 2003
457	6	modified	Alex Pullen et al.2011. Qaidam Basin and northern Tibetan Plateau as dust sources for the Chinese Loess Plateau and paleoclimatic implications.GEOLOGY.v. 39 no. 11 p. 1031-1034
457	7	LA-ICP-MS	J. X. ZHANG et al.2010. U–Pb zircon geochronology of coesite-bearing eclogites from the southern Dulan area of the North Qaidam UHP terrane, northwestern China: spatially and temporally extensive UHP metamorphism during continental subduction.Journal of Metamorphic Geology.Volume 28, Issue 9, pages 955–978.
457	22	LA-ICP-MS	Shuguang Song et al.2005.Geochronology of diamond-bearing zircons from garnet peridotite in the North Qaidam UHPM belt, Northern Tibetan Plateau: A record of complex histories from oceanic lithosphere subduction to continental collision.Earth and Planetary Science Letters.Volume 234, Issues 1–2, 30 May 2005, Pages 99–118.
457	7	SHRIMP	shuguang Song et al.2006.Evolution from Oceanic Subduction to Continental Collision: a Case Study from the Northern Tibetan Plateau Based on Geochemical and Geochronological Data.Journal of Petrology.47(3),PAGES 435–455
457	8	modified	Shunli Dong et al.2013. Progress of Studies on Early Paleozoic Tectonic Framework and Crystalline Rock Geochronology in Altun—Qilian—Kunlun Orogen.Geological Review.59(4):731-746
457	7	LA-ICP-MS	Yunfei Ren et al., 2015, Petrology and geochronology of ultrahigh-pressure granitic gneiss from South Dulan, North Qaidam belt, NW China
457.7	3.3	TIMS	Jingsui Yang et al.2006. Protolith of eclogites in the north Qaidam and Altun UHP terrane, NW China: Earlier oceanic crust? Journal of Asian Earth Sciences.Volume 28, Issues 2–3, 15 November 2006, Pages 185–204
457.9	1.2	modified	Shunli Dong et al.2013. Progress of Studies on Early Paleozoic Tectonic Framework and Crystalline Rock Geochronology in Altun—Qilian—Kunlun Orogen.Geological Review.59(4):731-746
458	3	modified	Alex Pullen et al.2011. Qaidam Basin and northern Tibetan Plateau as dust sources for the Chinese Loess Plateau and paleoclimatic implications.GEOLOGY.v. 39 no. 11 p. 1031-1034
458	10	LA-ICP-MS	J. X. ZHANG et al.2010. U–Pb zircon geochronology of coesite-bearing eclogites from the southern Dulan area of the North Qaidam UHP terrane, northwestern China: spatially and temporally extensive UHP metamorphism during continental subduction.Journal of Metamorphic Geology.Volume 28, Issue 9, pages 955–978.
458	3	modified	Shunli Dong et al.2013. Progress of Studies on Early Paleozoic Tectonic Framework and Crystalline Rock Geochronology in Altun—Qilian—Kunlun Orogen.Geological Review.59(4):731-746
458	7	modified	Shunli Dong et al.2013. Progress of Studies on Early Paleozoic Tectonic Framework and Crystalline Rock Geochronology in Altun—Qilian—Kunlun Orogen.Geological Review.59(4):731-746
458	6	modified	Shunli Dong et al.2013. Progress of Studies on Early Paleozoic Tectonic Framework and Crystalline Rock Geochronology in Altun—Qilian—Kunlun Orogen.Geological Review.59(4):731-746
458	9	LA-ICP-MS	Xiaofeng Gao et al.2010. Zircon LA-ICP-MS U-Pb dating and geological significance of Bashierxi granite in the eastern Kunlun area, China.GEOLOGICAL BULLETIN OF CHINA.29(7):1001-1008.
458	2	LA-ICP-MS	Yunfei Ren et al., 2015, Petrology and geochronology of ultrahigh-pressure granitic gneiss from South Dulan, North Qaidam belt, NW China
458	6	LA-ICP-MS	Yunfei Ren et al., 2015, Petrology and geochronology of ultrahigh-pressure granitic gneiss from South Dulan, North Qaidam belt, NW China
458.2	2.4	modified	Shunli Dong et al.2013. Progress of Studies on Early Paleozoic Tectonic Framework and Crystalline Rock Geochronology in Altun—Qilian—Kunlun Orogen.Geological Review.59(4):731-746
458.8	8	LA-ICP-MS	Eric Cowgill et al.2003. Reconstruction of the Altyn Tagh fault based on U-Pb geochronology: Role of back thrusts, mantle sutures, and heterogeneous crustal strength in forming the Tibetan Plateau.Journal of Geophysical.Volume 108, Issue B7, July 2003
459	8	modified	Alex Pullen et al.2011. Qaidam Basin and northern Tibetan Plateau as dust sources for the Chinese Loess Plateau and paleoclimatic implications.GEOLOGY.v. 39 no. 11 p. 1031-1034
459	2.5	LA-ICP-MS	Jingwen Mao et al.2000. U-Pb Zircon Dating of the Yeniutan Granitic Intrusion in the Western Part of theNorth Qilian Mountains.GEOLOGICAL REVIEW.46(6):616-620
460	8	SHRIMP	Jianxin Zhang et al.2003. Early Paleozoic tectono-thermal event of the Jinshuikou Group on the southern margin of Qaidam:Zircon U-Pb SHRIMP age evidence.GEOLOGICAL BULLETIN OF CHINA.22(6):397-404.
460.8	7.8	LA-ICP-MS	Eric Cowgill et al.2003. Reconstruction of the Altyn Tagh fault based on U-Pb geochronology: Role of back thrusts, mantle sutures, and heterogeneous crustal strength in forming the Tibetan Plateau.Journal of Geophysical.Volume 108, Issue B7, July 2003
460.8	5.2	modified	Shunli Dong et al.2013. Progress of Studies on Early Paleozoic Tectonic Framework and Crystalline Rock Geochronology in Altun—Qilian—Kunlun Orogen.Geological Review.59(4):731-746
461	8	modified	Alex Pullen et al.2011. Qaidam Basin and northern Tibetan Plateau as dust sources for the Chinese Loess Plateau and paleoclimatic implications.GEOLOGY.v. 39 no. 11 p. 1031-1034
461	5	modified	Alex Pullen et al.2011. Qaidam Basin and northern Tibetan Plateau as dust sources for the Chinese Loess Plateau and paleoclimatic implications.GEOLOGY.v. 39 no. 11 p. 1031-1034
461	8	LA-ICP-MS	Jianxin Zhang et al.2009.U–Pb geochronology of paragneisses and metabasite in the Xitieshan area, north Qaidam Mountains, western China: Constraints on the exhumation of HP/UHP metamorphic rocks.Journal of Asian Earth Sciences.Volume 35, Issues 3–4, 1 July 2009, Pages 245–258
461	8	LA-ICP-MS	Yunfei Ren et al., 2015, Petrology and geochronology of ultrahigh-pressure granitic gneiss from South Dulan, North Qaidam belt, NW China
462	11.6	TIMS	Jingsui Yang et al.2006. Protolith of eclogites in the north Qaidam and Altun UHP terrane, NW China: Earlier oceanic crust? Journal of Asian Earth Sciences.Volume 28, Issues 2–3, 15 November 2006, Pages 185–204
462	10	modified	Shunli Dong et al.2013. Progress of Studies on Early Paleozoic Tectonic Framework and Crystalline Rock Geochronology in Altun—Qilian—Kunlun Orogen.Geological Review.59(4):731-746
462	1.3	modified	Shunli Dong et al.2013. Progress of Studies on Early Paleozoic Tectonic Framework and Crystalline Rock Geochronology in Altun—Qilian—Kunlun Orogen.Geological Review.59(4):731-746
462	2	LA-ICP-MS	Yuting Cao et al.2010. Geochemical,zircon U-Pb dating and Hf isotope compositions studies for Tatelekebulake granite in South Altyn Tagh. Acta Petrologica Sinica.26(11):3259-3271.
462	13	LA-ICP-MS	Yunfei Ren et al., 2015, Petrology and geochronology of ultrahigh-pressure granitic gneiss from South Dulan, North Qaidam belt, NW China
462.9	1.4	LA-ICP-MS	Ruirong Qi. 2012 . LA-ICP-MS zircon U-Pb ages and geological implications for the Bagadeerji granitic plutons in the central Qilian Mountains, Gansu.Sedimentary Geology and Tethyan Geology.32(4):
463	6	SHRIMP	Shuguang Song et al.2004. Zircon U-Pb SHRIMP ages of eclogites from the North Qilian Mountains in NW China and their tectonic implication.Chinese Science Bulletin.April 2004, Volume 49, Issue 8, pp 848-852
463.2	4.7	modified	Shunli Dong et al.2013. Progress of Studies on Early Paleozoic Tectonic Framework and Crystalline Rock Geochronology in Altun—Qilian—Kunlun Orogen.Geological Review.59(4):731-746
464	6	SHRIMP	shuguang Song et al.2006.Evolution from Oceanic Subduction to Continental Collision: a Case Study from the Northern Tibetan Plateau Based on Geochemical and Geochronological Data.Journal of Petrology.47(3),PAGES 435–455
464.59	21.89	modified	Shunli Dong et al.2013. Progress of Studies on Early Paleozoic Tectonic Framework and Crystalline Rock Geochronology in Altun—Qilian—Kunlun Orogen.Geological Review.59(4):731-746
465	2.9	modified	Shunli Dong et al.2013. Progress of Studies on Early Paleozoic Tectonic Framework and Crystalline Rock Geochronology in Altun—Qilian—Kunlun Orogen.Geological Review.59(4):731-746
465.4	3.5	SHRIMP	Cailai Wu et al.2009. Geochemistry and zircon SHRIMP U-Pb dating of grani-toids from the west segment of the North Qaidam.SCIENCE CHINA Earth Sciences.52(11):1771-1790
467	1	modified	Zhao-Wei Zhang et al.2014. Sulfide mineralization associated with arc magmatism in the Qilian Block, western China: zircon U-Pb age and Sr-Nd-Os-S isotope constraints from the Yulonggou and Yaqu gabbroic intrusions.Mineralium Deposita.February 2014, Volum_x0000__x0000__x0000__x0000__x0000__x0000__x0000__x0000__x0000__x0000__x0000__x0000__x0000__x0000__x0000__x0000__x0003__x0000_d_x0000_d_x0000__x…
467.1	6	U-Pb	Jie Hao et al.2006. Jinyanshan collisional oroginic belt of the early Paleozoic in the Altun mountains: evidence from single zircon U-Pb and 40Ar/39Ar isotopic dating for the arc magmatite and ophiolitic mélange.ACTA PETROLOGICA SINICA.22(11)：22(11): 2743-2752
467.2	0.9	SHRIMP	Bian, Q.T. et al. 2004. Age, geochemistry and tectonic setting of Buqingshan ophiolites, North Qinghai–Tibet Plateau, China. Journal of Asian Earth Sciences 23, 577–596.
468	13	SHRIMP	Shuguang Song et al.2004. Zircon U-Pb SHRIMP ages of eclogites from the North Qilian Mountains in NW China and their tectonic implication.Chinese Science Bulletin.April 2004, Volume 49, Issue 8, pp 848-852
468	2	LA-ICP-MS	Xiaohui Zhu et al.2010. Zicon LA-ICP-MS U-Pb dating of the Wanggaxiu gabbro complex in the Dulan area, northern margin of Qaidam Basin, China and its geological significance.Geological Bulletin of China.2010,29(0203):227-236.
468	4	LA-ICP-MS	Yunfei Ren et al., 2015, Petrology and geochronology of ultrahigh-pressure granitic gneiss from South Dulan, North Qaidam belt, NW China
468.87	4.63	modified	Shunli Dong et al.2013. Progress of Studies on Early Paleozoic Tectonic Framework and Crystalline Rock Geochronology in Altun—Qilian—Kunlun Orogen.Geological Review.59(4):731-746
469.7	4.6	SHRIMP	Cailai Wu et al.2009. Geochemistry and zircon SHRIMP U-Pb dating of grani-toids from the west segment of the North Qaidam.SCIENCE CHINA Earth Sciences.52(11):1771-1790
469.7	3.4	LA-ICP-MS	Zhanwu Zhang et al.2012.LA-ICP-MS zircon U-Pb geochronology and geochemistry of gabbro and diorite from Qilesayi pluton in Lapeiquan area of northern Altun Mountains and their tectonic implications.Acta Petrologica Et Mineralogica,2012,31(1):13-27.
470	1	modified	Zhao-Wei Zhang et al.2014. Sulfide mineralization associated with arc magmatism in the Qilian Block, western China: zircon U-Pb age and Sr-Nd-Os-S isotope constraints from the Yulonggou and Yaqu gabbroic intrusions.Mineralium Deposita.February 2014, Volum_x0000__x0000__x0000__x0000__x0000__x0000__x0000__x0000__x0000__x0000__x0000__x0000__x0000__x0000__x0000__x0000__x0003__x0000_d_x0000_d_x0000__x…
471	5	modified	Alex Pullen et al.2011. Qaidam Basin and northern Tibetan Plateau as dust sources for the Chinese Loess Plateau and paleoclimatic implications.GEOLOGY.v. 39 no. 11 p. 1031-1034
471	5	modified	Shunli Dong et al.2013. Progress of Studies on Early Paleozoic Tectonic Framework and Crystalline Rock Geochronology in Altun—Qilian—Kunlun Orogen.Geological Review.59(4):731-746
472	6	LA-MC-ICPMS	George E. Gehrels et al.2003.Magmatic history of the northeastern Tibetan Plateau.JOURNAL OF GEOPHYSICAL RESEARCH, VOL. 108, NO. B9, 2423
473	5	modified	Alex Pullen et al.2011. Qaidam Basin and northern Tibetan Plateau as dust sources for the Chinese Loess Plateau and paleoclimatic implications.GEOLOGY.v. 39 no. 11 p. 1031-1034
473	3	modified	Shunli Dong et al.2013. Progress of Studies on Early Paleozoic Tectonic Framework and Crystalline Rock Geochronology in Altun—Qilian—Kunlun Orogen.Geological Review.59(4):731-746
474.3	6.8	SHRIMP	Cailai Wu et al.2005. Characteristics of the granitoid complex and its zircon SHRIMP dating at the south margin of the Bashikaogong Basin, North Altun, NW China.ACTA PETROLOGICA SINICA.21(3):846-858.
475	6	modified	Alex Pullen et al.2011. Qaidam Basin and northern Tibetan Plateau as dust sources for the Chinese Loess Plateau and paleoclimatic implications.GEOLOGY.v. 39 no. 11 p. 1031-1034
475	4	modified	Shunli Dong et al.2013. Progress of Studies on Early Paleozoic Tectonic Framework and Crystalline Rock Geochronology in Altun—Qilian—Kunlun Orogen.Geological Review.59(4):731-746
475	8.8	modified	Shunli Dong et al.2013. Progress of Studies on Early Paleozoic Tectonic Framework and Crystalline Rock Geochronology in Altun—Qilian—Kunlun Orogen.Geological Review.59(4):731-746
475.1	5.9	LA-ICP-MS	Eric Cowgill et al.2003. Reconstruction of the Altyn Tagh fault based on U-Pb geochronology: Role of back thrusts, mantle sutures, and heterogeneous crustal strength in forming the Tibetan Plateau.Journal of Geophysical.Volume 108, Issue B7, July 2003
475.6	5.9	SHRIMP	Cailai Wu et al.2010. Early Palaezoic grranitoid magmatism and tectonic evolution in North Qilian, NW China.ACTA PETROLOGICA SINICA.26(4):1027-1044.
476.7	6.6	modified	Shunli Dong et al.2013. Progress of Studies on Early Paleozoic Tectonic Framework and Crystalline Rock Geochronology in Altun—Qilian—Kunlun Orogen.Geological Review.59(4):731-746
477	16	modified	Alex Pullen et al.2011. Qaidam Basin and northern Tibetan Plateau as dust sources for the Chinese Loess Plateau and paleoclimatic implications.GEOLOGY.v. 39 no. 11 p. 1031-1034
477	16	modified	Shunli Dong et al.2013. Progress of Studies on Early Paleozoic Tectonic Framework and Crystalline Rock Geochronology in Altun—Qilian—Kunlun Orogen.Geological Review.59(4):731-746
477.5	3.3	LA-ICP-MS	Zhanwu Zhang et al.2012.LA-ICP-MS zircon U-Pb geochronology and geochemistry of gabbro and diorite from Qilesayi pluton in Lapeiquan area of northern Altun Mountains and their tectonic implications.Acta Petrologica Et Mineralogica,2012,31(1):13-27.
478	9.4	LA-ICP-MS	Eric Cowgill et al.2003. Reconstruction of the Altyn Tagh fault based on U-Pb geochronology: Role of back thrusts, mantle sutures, and heterogeneous crustal strength in forming the Tibetan Plateau.Journal of Geophysical.Volume 108, Issue B7, July 2003
478.8	5.4	modified	Shunli Dong et al.2013. Progress of Studies on Early Paleozoic Tectonic Framework and Crystalline Rock Geochronology in Altun—Qilian—Kunlun Orogen.Geological Review.59(4):731-746
479	64	LA-MC-ICPMS	George E. Gehrels et al.2003.Magmatic history of the northeastern Tibetan Plateau.JOURNAL OF GEOPHYSICAL RESEARCH, VOL. 108, NO. B9, 2423
479.4	8.5	modified	Shunli Dong et al.2013. Progress of Studies on Early Paleozoic Tectonic Framework and Crystalline Rock Geochronology in Altun—Qilian—Kunlun Orogen.Geological Review.59(4):731-746
480	6	LA-MC-ICPMS	George E. Gehrels et al.2003.Magmatic history of the northeastern Tibetan Plateau.JOURNAL OF GEOPHYSICAL RESEARCH, VOL. 108, NO. B9, 2423
480	3	modified	Shunli Dong et al.2013. Progress of Studies on Early Paleozoic Tectonic Framework and Crystalline Rock Geochronology in Altun—Qilian—Kunlun Orogen.Geological Review.59(4):731-746
480	16	modified	Shunli Dong et al.2013. Progress of Studies on Early Paleozoic Tectonic Framework and Crystalline Rock Geochronology in Altun—Qilian—Kunlun Orogen.Geological Review.59(4):731-746
480	16	LA-ICP-MS	Yunfei Ren et al., 2015, Petrology and geochronology of ultrahigh-pressure granitic gneiss from South Dulan, North Qaidam belt, NW China
481	130	Rb–Sr	Bian, Q.T. et al. 2004. Age, geochemistry and tectonic setting of Buqingshan ophiolites, North Qinghai–Tibet Plateau, China. Journal of Asian Earth Sciences 23, 577–596.
481.5	5.3	SHRIMP	Xuexiang Qi et al.2005. 北阿尔金恰什坎萨依花岗闪长岩的锆石SHRIMP U-Pb定年及其地质意义. Chin. Sci. Bull. . 50, 571-573.
481.6	5.6	SHRIMP	Cailai Wu et al.2007. 北阿尔金巴什考供-斯米尔布拉克花岗杂岩特征及锆石SHRIMP U-Pb定年. Science in China(Series D). 37, 10-26.
481.6	3.3	modified	Shunli Dong et al.2013. Progress of Studies on Early Paleozoic Tectonic Framework and Crystalline Rock Geochronology in Altun—Qilian—Kunlun Orogen.Geological Review.59(4):731-746
481.8	3.2	SHRIMP	Qilongchen. 2009. The Petrology of Niuxinshan Granitoids in the North Qilian and Their Zircon SHRIMP Dating.
482	5	LA-MC-ICPMS	George E. Gehrels et al.2003.Magmatic history of the northeastern Tibetan Plateau.JOURNAL OF GEOPHYSICAL RESEARCH, VOL. 108, NO. B9, 2423
482	11	LA-MC-ICPMS	George E. Gehrels et al.2003.Magmatic history of the northeastern Tibetan Plateau.JOURNAL OF GEOPHYSICAL RESEARCH, VOL. 108, NO. B9, 2423
482	10	SHRIMP	Nengsong Chen et al.2008. 东昆仑造山带中带的锆石U-Pb定年与构造演化启示. Science in China(Series D). 38, 657 - 666.
482	10	modified	Shunli Dong et al.2013. Progress of Studies on Early Paleozoic Tectonic Framework and Crystalline Rock Geochronology in Altun—Qilian—Kunlun Orogen.Geological Review.59(4):731-746
484	3	modified	Shunli Dong et al.2013. Progress of Studies on Early Paleozoic Tectonic Framework and Crystalline Rock Geochronology in Altun—Qilian—Kunlun Orogen.Geological Review.59(4):731-746
485.9	3	modified	Shunli Dong et al.2013. Progress of Studies on Early Paleozoic Tectonic Framework and Crystalline Rock Geochronology in Altun—Qilian—Kunlun Orogen.Geological Review.59(4):731-746
486	5	modified	Shunli Dong et al.2013. Progress of Studies on Early Paleozoic Tectonic Framework and Crystalline Rock Geochronology in Altun—Qilian—Kunlun Orogen.Geological Review.59(4):731-746
486	2	modified	Shunli Dong et al.2013. Progress of Studies on Early Paleozoic Tectonic Framework and Crystalline Rock Geochronology in Altun—Qilian—Kunlun Orogen.Geological Review.59(4):731-746
486	2	LA-ICP-MS	Yunfei Ren et al., 2015, Petrology and geochronology of ultrahigh-pressure granitic gneiss from South Dulan, North Qaidam belt, NW China
486.37	38.69	modified	Shunli Dong et al.2013. Progress of Studies on Early Paleozoic Tectonic Framework and Crystalline Rock Geochronology in Altun—Qilian—Kunlun Orogen.Geological Review.59(4):731-746
487	8.2	TIMS	Jingsui Yang et al.2006. Protolith of eclogites in the north Qaidam and Altun UHP terrane, NW China: Earlier oceanic crust? Journal of Asian Earth Sciences.Volume 28, Issues 2–3, 15 November 2006, Pages 185–204
487	10	modified	Shunli Dong et al.2013. Progress of Studies on Early Paleozoic Tectonic Framework and Crystalline Rock Geochronology in Altun—Qilian—Kunlun Orogen.Geological Review.59(4):731-746
487	17	LA-ICP-MS	Yunfei Ren et al., 2015, Petrology and geochronology of ultrahigh-pressure granitic gneiss from South Dulan, North Qaidam belt, NW China
488	6	modified	Shunli Dong et al.2013. Progress of Studies on Early Paleozoic Tectonic Framework and Crystalline Rock Geochronology in Altun—Qilian—Kunlun Orogen.Geological Review.59(4):731-746
488	6	LA-ICP-MS	Yunfei Ren et al., 2015, Petrology and geochronology of ultrahigh-pressure granitic gneiss from South Dulan, North Qaidam belt, NW China
489	7	modified	Alex Pullen et al.2011. Qaidam Basin and northern Tibetan Plateau as dust sources for the Chinese Loess Plateau and paleoclimatic implications.GEOLOGY.v. 39 no. 11 p. 1031-1034
489	7	modified	Shunli Dong et al.2013. Progress of Studies on Early Paleozoic Tectonic Framework and Crystalline Rock Geochronology in Altun—Qilian—Kunlun Orogen.Geological Review.59(4):731-746
489.3	16.2	modified	Shunli Dong et al.2013. Progress of Studies on Early Paleozoic Tectonic Framework and Crystalline Rock Geochronology in Altun—Qilian—Kunlun Orogen.Geological Review.59(4):731-746
491.3	4.8	modified	Shunli Dong et al.2013. Progress of Studies on Early Paleozoic Tectonic Framework and Crystalline Rock Geochronology in Altun—Qilian—Kunlun Orogen.Geological Review.59(4):731-746
492	9	SHRIMP	Xiao, WJ et al.2005. Accretionary tectonics of the Western Kunlun Orogen, China: A Paleozoic-Early Mesozoic, long-lived active continental margin with implications for the growth of Southern Eurasia.The Journal of Geology.2005, v. 113 n. 6, p. 687-705
493	4.3	modified	Shunli Dong et al.2013. Progress of Studies on Early Paleozoic Tectonic Framework and Crystalline Rock Geochronology in Altun—Qilian—Kunlun Orogen.Geological Review.59(4):731-746
493	7	modified	Shunli Dong et al.2013. Progress of Studies on Early Paleozoic Tectonic Framework and Crystalline Rock Geochronology in Altun—Qilian—Kunlun Orogen.Geological Review.59(4):731-746
493	1	LA-ICP MS	Xuanhua Chen et al.2012. Paleozoic and Mesozoic Basement Magmatisms of Eastern Qaidam Basin, Northern Qinghai-Tibet Plateau: LA-ICP-MS Zircon U-Pb Geochronology and its Geological Significance.Acta Geologica Sinica.Volume 86, Issue 2, pages 350–369
495	6.5	modified	Shunli Dong et al.2013. Progress of Studies on Early Paleozoic Tectonic Framework and Crystalline Rock Geochronology in Altun—Qilian—Kunlun Orogen.Geological Review.59(4):731-746
495	7	modified	Shunli Dong et al.2013. Progress of Studies on Early Paleozoic Tectonic Framework and Crystalline Rock Geochronology in Altun—Qilian—Kunlun Orogen.Geological Review.59(4):731-746
495.11	13.78	modified	Shunli Dong et al.2013. Progress of Studies on Early Paleozoic Tectonic Framework and Crystalline Rock Geochronology in Altun—Qilian—Kunlun Orogen.Geological Review.59(4):731-746
496.3	6.2	modified	Shunli Dong et al.2013. Progress of Studies on Early Paleozoic Tectonic Framework and Crystalline Rock Geochronology in Altun—Qilian—Kunlun Orogen.Geological Review.59(4):731-746
497	11	modified	Shunli Dong et al.2013. Progress of Studies on Early Paleozoic Tectonic Framework and Crystalline Rock Geochronology in Altun—Qilian—Kunlun Orogen.Geological Review.59(4):731-746
497	7	modified	Shunli Dong et al.2013. Progress of Studies on Early Paleozoic Tectonic Framework and Crystalline Rock Geochronology in Altun—Qilian—Kunlun Orogen.Geological Review.59(4):731-746
500	10	modified	Shunli Dong et al.2013. Progress of Studies on Early Paleozoic Tectonic Framework and Crystalline Rock Geochronology in Altun—Qilian—Kunlun Orogen.Geological Review.59(4):731-746
500.2	1.2	SHRIMP	Zhanwu Zhang et al.2007. Zircon SHRIMP U-Pb dating of Early Paleozoic amphibolite and granodiorite in Korliang, northwestern Kangxiwar, West Kunlun.GEOLOGICAL BULLETIN OF CHINA.26(6)
500.3	1.2	LA-ICP-MS	Lei Tang et al.2011. Geochemistry, zircon LA-ICP-MS U-Pb ages and Elf isotopes of Hongliugou moyite from north Altyn Tagh tectonic belt.GEOLOGICAL BULLETIN OF CHINA.30(7):1066-1076
500.7	4.6	SHRIMP	Cailai Wu et al.2010. Early Palaezoic grranitoid magmatism and tectonic evolution in North Qilian, NW China.ACTA PETROLOGICA SINICA.26(4):1027-1044.
500.7	4.6	modified	Shunli Dong et al.2013. Progress of Studies on Early Paleozoic Tectonic Framework and Crystalline Rock Geochronology in Altun—Qilian—Kunlun Orogen.Geological Review.59(4):731-746
501	31	modified	Shunli Dong et al.2013. Progress of Studies on Early Paleozoic Tectonic Framework and Crystalline Rock Geochronology in Altun—Qilian—Kunlun Orogen.Geological Review.59(4):731-746
501	16	modified	Shunli Dong et al.2013. Progress of Studies on Early Paleozoic Tectonic Framework and Crystalline Rock Geochronology in Altun—Qilian—Kunlun Orogen.Geological Review.59(4):731-746
502	16	modified	Alex Pullen et al.2011. Qaidam Basin and northern Tibetan Plateau as dust sources for the Chinese Loess Plateau and paleoclimatic implications.GEOLOGY.v. 39 no. 11 p. 1031-1034
502	9	SHRIMP	Jiantang Cui et al.2007. Zircon SHRIMP U-Pb dating of the Dongbake gneissic tonalite in northern Kangxiwar, West Kunlun.GEOLOGICAL BULLETIN OF CHINA.26(6)
503.7	6.4	SHRIMP	Zhenqun Xiang.2007. SHRIMP U-Pb zircon age of gabbro in Aoyougou in the western segment of the North Qilian Mountains, China and its geological implications.Geological Bulletin of China,2007,(12):1686-1691
503.9	5.3	modified	Shunli Dong et al.2013. Progress of Studies on Early Paleozoic Tectonic Framework and Crystalline Rock Geochronology in Altun—Qilian—Kunlun Orogen.Geological Review.59(4):731-746
505	8	modified	Shunli Dong et al.2013. Progress of Studies on Early Paleozoic Tectonic Framework and Crystalline Rock Geochronology in Altun—Qilian—Kunlun Orogen.Geological Review.59(4):731-746
506	1	modified	Shunli Dong et al.2013. Progress of Studies on Early Paleozoic Tectonic Framework and Crystalline Rock Geochronology in Altun—Qilian—Kunlun Orogen.Geological Review.59(4):731-746
506.8	9.8	SHRIMP	Zhanwu Zhang et al.2007. Zircon SHRIMP U-Pb dating of Early Paleozoic amphibolite and granodiorite in Korliang, northwestern Kangxiwar, West Kunlun.GEOLOGICAL BULLETIN OF CHINA.26(6)
508	41	modified	Shunli Dong et al.2013. Progress of Studies on Early Paleozoic Tectonic Framework and Crystalline Rock Geochronology in Altun—Qilian—Kunlun Orogen.Geological Review.59(4):731-746
508.3	4.6	SHRIMP	Cailai Wu et al.2010. Early Palaezoic grranitoid magmatism and tectonic evolution in North Qilian, NW China.ACTA PETROLOGICA SINICA.26(4):1027-1044.
509	12	modified	Shunli Dong et al.2013. Progress of Studies on Early Paleozoic Tectonic Framework and Crystalline Rock Geochronology in Altun—Qilian—Kunlun Orogen.Geological Review.59(4):731-746
509.4	6.8	LA-ICP-MS	Jianyun Feng et al. 2010.The discovery of the mafic-ultramafic melange in Kekesha area of Dulan County,East Kunlun region,and its LA-ICP-MS zircon U-Pb age.Chinese Geology,2010,37(1).
510	4	modified	Shunli Dong et al.2013. Progress of Studies on Early Paleozoic Tectonic Framework and Crystalline Rock Geochronology in Altun—Qilian—Kunlun Orogen.Geological Review.59(4):731-746
512.4	1.8	SHRIMP	Cailai Wu et al.2010. Early Palaezoic grranitoid magmatism and tectonic evolution in North Qilian, NW China.ACTA PETROLOGICA SINICA.26(4):1027-1044.
513	1	modified	Zhao-Wei Zhang et al.2014. Sulfide mineralization associated with arc magmatism in the Qilian Block, western China: zircon U-Pb age and Sr-Nd-Os-S isotope constraints from the Yulonggou and Yaqu gabbroic intrusions.Mineralium Deposita.February 2014, Volum_x0000__x0000__x0000__x0000__x0000__x0000__x0000__x0000__x0000__x0000__x0000__x0000__x0000__x0000__x0000__x0000__x0003__x0000_d_x0000_d_x0000__x…
515.2	4.4	LA-ICP-MS	Yafeng Zhang et al.2010. LA-ICP-MS zircon U-Pb age of quartz diorite at the Kekesha area of Dulan County, eastern section of the East Kunlun orogenic belt, China and its significance.Geologcal Bulletin OF China,2010,29(1):79-85.
516	8	SHRIMP	Guibin Zhang et al.2008. The subducted oceanic crust within continental-type UHP metamorphic belt in the North Qaidam, NW China: Evidence from petrology,geochemistry and geochronology.Lithos 104 (2008) 99–118
516.2	5.8	SHRIMP	Nengsong Chen et al.2008. 东昆仑造山带中带的锆石U-Pb定年与构造演化启示. Science in China(Series D). 38, 657 - 666.
516.2	5.8	modified	Shunli Dong et al.2013. Progress of Studies on Early Paleozoic Tectonic Framework and Crystalline Rock Geochronology in Altun—Qilian—Kunlun Orogen.Geological Review.59(4):731-746
517	5	modified	Shunli Dong et al.2013. Progress of Studies on Early Paleozoic Tectonic Framework and Crystalline Rock Geochronology in Altun—Qilian—Kunlun Orogen.Geological Review.59(4):731-746
518	13	modified	Alex Pullen et al.2011. Qaidam Basin and northern Tibetan Plateau as dust sources for the Chinese Loess Plateau and paleoclimatic implications.GEOLOGY.v. 39 no. 11 p. 1031-1034
518	3	modified	Shunli Dong et al.2013. Progress of Studies on Early Paleozoic Tectonic Framework and Crystalline Rock Geochronology in Altun—Qilian—Kunlun Orogen.Geological Review.59(4):731-746
518.1	12.5	LA-ICP-MS	Eric Cowgill et al.2003. Reconstruction of the Altyn Tagh fault based on U-Pb geochronology: Role of back thrusts, mantle sutures, and heterogeneous crustal strength in forming the Tibetan Plateau.Journal of Geophysical.Volume 108, Issue B7, July 2003
521.1	11.9	modified	Shunli Dong et al.2013. Progress of Studies on Early Paleozoic Tectonic Framework and Crystalline Rock Geochronology in Altun—Qilian—Kunlun Orogen.Geological Review.59(4):731-746
521.48	23.79	modified	Shunli Dong et al.2013. Progress of Studies on Early Paleozoic Tectonic Framework and Crystalline Rock Geochronology in Altun—Qilian—Kunlun Orogen.Geological Review.59(4):731-746
522.3	4.1	modified	Shunli Dong et al.2013. Progress of Studies on Early Paleozoic Tectonic Framework and Crystalline Rock Geochronology in Altun—Qilian—Kunlun Orogen.Geological Review.59(4):731-746
523.61	19.84	modified	Shunli Dong et al.2013. Progress of Studies on Early Paleozoic Tectonic Framework and Crystalline Rock Geochronology in Altun—Qilian—Kunlun Orogen.Geological Review.59(4):731-746
524.4	43.9	modified	Shunli Dong et al.2013. Progress of Studies on Early Paleozoic Tectonic Framework and Crystalline Rock Geochronology in Altun—Qilian—Kunlun Orogen.Geological Review.59(4):731-746
525	2.9	SHRIMP	Chuanlin Zhang et al.2004. Zircon SHRIMP Age Determination of the Giant-crystal Gabbro and Basalt in K(u)da,West Kunlun:Dismembering of the K(u)da Ophiolite.GEOLOGICAL REVIEW.50(6):639-643.
525.7	1	modified	Shunli Dong et al.2013. Progress of Studies on Early Paleozoic Tectonic Framework and Crystalline Rock Geochronology in Altun—Qilian—Kunlun Orogen.Geological Review.59(4):731-746
549	10	SHRIMP	Nengsong Chen et al.2008. 东昆仑造山带中带的锆石U-Pb定年与构造演化启示. Science in China(Series D). 38, 657 - 666.
549	10	modified	Shunli Dong et al.2013. Progress of Studies on Early Paleozoic Tectonic Framework and Crystalline Rock Geochronology in Altun—Qilian—Kunlun Orogen.Geological Review.59(4):731-746
550	17	modified	Shunli Dong et al.2013. Progress of Studies on Early Paleozoic Tectonic Framework and Crystalline Rock Geochronology in Altun—Qilian—Kunlun Orogen.Geological Review.59(4):731-746
579	6	modified	Shunli Dong et al.2013. Progress of Studies on Early Paleozoic Tectonic Framework and Crystalline Rock Geochronology in Altun—Qilian—Kunlun Orogen.Geological Review.59(4):731-746
651	53	modified	Shunli Dong et al.2013. Progress of Studies on Early Paleozoic Tectonic Framework and Crystalline Rock Geochronology in Altun—Qilian—Kunlun Orogen.Geological Review.59(4):731-746
723	25	Sm-Nd	Fusheng Yu et al.2002. Chronological evidence of Neoproterozoic volcanic rocks in the eastern segment of the North Qilian Mountains.GEOLOGY IN CHINA.29(4):360-363
775	14	SHRIMP	Hengyue Zhang. 2011. 阿尔金红柳沟北南华纪火山岩地质特征及锆石U——Pb SHRIMP定年. West-China Exploration Engineering 9,107-111.
785	20	LA-ICP-MS	Qing Xiong et al.2012.Decoupling of U-Pb and Lu-Hf isotopes and trace elements in zircon from the UHP North Qaidam orogen, NE Tibet (China) : tracing the deep subduction of continental blocks.Lithos 155 (2012) 125–145
824	1	modified	Shunli Dong et al.2013. Progress of Studies on Early Paleozoic Tectonic Framework and Crystalline Rock Geochronology in Altun—Qilian—Kunlun Orogen.Geological Review.59(4):731-746
860.5	1	modified	Shunli Dong et al.2013. Progress of Studies on Early Paleozoic Tectonic Framework and Crystalline Rock Geochronology in Altun—Qilian—Kunlun Orogen.Geological Review.59(4):731-746
904	10	SHRIMP	Nengsong Chen.2006. Zircon SHRIMP U-Pb age of Neoproterozoic metagranite in the North Kunlun unit on the southern margin of the Qaidam block in China.GEOLOGICAL BULLETIN OF CHINA.25(11):25(11):1311-1314.
910	7.4	LA-ICP-MS	Jiyuan Xu et al.2012. The LA-ICP-MS U-Pb Age and Geological Significance of Hualong Rock Group in South Qilian Mountains.Northwestern Geology.45(1):79-85
920	20	SHRIMP	Zhicheng Zhang et al.2010. SHRIMP U-Pb age of zircons from Suoerkuli rhyolite in the Altyn Tagh mountains and its geological significations.ACTA PETROLOGICA SINICA.26(2): 597-606
955	91	modified	Shunli Dong et al.2013. Progress of Studies on Early Paleozoic Tectonic Framework and Crystalline Rock Geochronology in Altun—Qilian—Kunlun Orogen.Geological Review.59(4):731-746
969	17	modified	Alex Pullen et al.2011. Qaidam Basin and northern Tibetan Plateau as dust sources for the Chinese Loess Plateau and paleoclimatic implications.GEOLOGY.v. 39 no. 11 p. 1031-1034
1023	1	modified	Shunli Dong et al.2013. Progress of Studies on Early Paleozoic Tectonic Framework and Crystalline Rock Geochronology in Altun—Qilian—Kunlun Orogen.Geological Review.59(4):731-746
391. 2	3. 4	LA-MC-ICP MS	Lu Lu et al.2010. ZIRCON U-Pb AGE FROM SYNTECTONIC GRANITIC PORPHYRY IN THE MIDDLE KUNLUN FAULT BELT AND ITS TECTONIC SIGNIFICANCE.JOURNAL OF GEOMECHANICS.16(1):36-43.
408. 5	2. 3	LA-MC-ICP MS	Lu Lu et al.2010. ZIRCON U-Pb AGE FROM SYNTECTONIC GRANITIC PORPHYRY IN THE MIDDLE KUNLUN FAULT BELT AND ITS TECTONIC SIGNIFICANCE.JOURNAL OF GEOMECHANICS.16(1):36-43.
450. 4	4. 3	SHRIMP	Yaoling Zhang et al.2010. SHRIMP ZIRCON U-Pb AGES OF RHYOLITE FROM THE NAIJ TAL GROUP IN THE EAST KULUN OROGENIC BELT.JOURNAL OF GEOMECHANICS.16(1):21-27.

## Sheet: Central Asian Orogen
ages (Ma)	2σ error	system	source
Central Asian Orogen: Tianshan & Altai & Gobi Mountains
451.4	5.4	SHRIMP	Aiqin Hu et al.2008. SHRIMP U-Pb ages for zircons of the amphibolites and tectonic evolution significance from the Wenquan domain in the West Tianshan Mountains, Xinjing, China.ACTA PETROLOGICA SINICA.24(12):2731-2740
455.1	2.7	SHRIMP	Aiqin Hu et al.2008. SHRIMP U-Pb ages for zircons of the amphibolites and tectonic evolution significance from the Wenquan domain in the West Tianshan Mountains, Xinjing, China.ACTA PETROLOGICA SINICA.24(12):2731-2740
135	1.7	modified	Alex Pullen et al.2011. Qaidam Basin and northern Tibetan Plateau as dust sources for the Chinese Loess Plateau and paleoclimatic implications.GEOLOGY.v. 39 no. 11 p. 1031-1034
228	21	modified	Alex Pullen et al.2011. Qaidam Basin and northern Tibetan Plateau as dust sources for the Chinese Loess Plateau and paleoclimatic implications.GEOLOGY.v. 39 no. 11 p. 1031-1034
228	7	modified	Alex Pullen et al.2011. Qaidam Basin and northern Tibetan Plateau as dust sources for the Chinese Loess Plateau and paleoclimatic implications.GEOLOGY.v. 39 no. 11 p. 1031-1034
262	2	modified	Alex Pullen et al.2011. Qaidam Basin and northern Tibetan Plateau as dust sources for the Chinese Loess Plateau and paleoclimatic implications.GEOLOGY.v. 39 no. 11 p. 1031-1034
271	7	modified	Alex Pullen et al.2011. Qaidam Basin and northern Tibetan Plateau as dust sources for the Chinese Loess Plateau and paleoclimatic implications.GEOLOGY.v. 39 no. 11 p. 1031-1034
274	6	modified	Alex Pullen et al.2011. Qaidam Basin and northern Tibetan Plateau as dust sources for the Chinese Loess Plateau and paleoclimatic implications.GEOLOGY.v. 39 no. 11 p. 1031-1034
274	5	modified	Alex Pullen et al.2011. Qaidam Basin and northern Tibetan Plateau as dust sources for the Chinese Loess Plateau and paleoclimatic implications.GEOLOGY.v. 39 no. 11 p. 1031-1034
277.7	2.4	modified	Alex Pullen et al.2011. Qaidam Basin and northern Tibetan Plateau as dust sources for the Chinese Loess Plateau and paleoclimatic implications.GEOLOGY.v. 39 no. 11 p. 1031-1034
278.9	1.8	modified	Alex Pullen et al.2011. Qaidam Basin and northern Tibetan Plateau as dust sources for the Chinese Loess Plateau and paleoclimatic implications.GEOLOGY.v. 39 no. 11 p. 1031-1034
279.6	3.9	modified	Alex Pullen et al.2011. Qaidam Basin and northern Tibetan Plateau as dust sources for the Chinese Loess Plateau and paleoclimatic implications.GEOLOGY.v. 39 no. 11 p. 1031-1034
280	1	modified	Alex Pullen et al.2011. Qaidam Basin and northern Tibetan Plateau as dust sources for the Chinese Loess Plateau and paleoclimatic implications.GEOLOGY.v. 39 no. 11 p. 1031-1034
280.8	3.6	modified	Alex Pullen et al.2011. Qaidam Basin and northern Tibetan Plateau as dust sources for the Chinese Loess Plateau and paleoclimatic implications.GEOLOGY.v. 39 no. 11 p. 1031-1034
281.5	0.5	modified	Alex Pullen et al.2011. Qaidam Basin and northern Tibetan Plateau as dust sources for the Chinese Loess Plateau and paleoclimatic implications.GEOLOGY.v. 39 no. 11 p. 1031-1034
286.8	1.8	modified	Alex Pullen et al.2011. Qaidam Basin and northern Tibetan Plateau as dust sources for the Chinese Loess Plateau and paleoclimatic implications.GEOLOGY.v. 39 no. 11 p. 1031-1034
289.2	2.3	modified	Alex Pullen et al.2011. Qaidam Basin and northern Tibetan Plateau as dust sources for the Chinese Loess Plateau and paleoclimatic implications.GEOLOGY.v. 39 no. 11 p. 1031-1034
292.4	3.6	modified	Alex Pullen et al.2011. Qaidam Basin and northern Tibetan Plateau as dust sources for the Chinese Loess Plateau and paleoclimatic implications.GEOLOGY.v. 39 no. 11 p. 1031-1034
294	5	modified	Alex Pullen et al.2011. Qaidam Basin and northern Tibetan Plateau as dust sources for the Chinese Loess Plateau and paleoclimatic implications.GEOLOGY.v. 39 no. 11 p. 1031-1034
295.7	2.2	modified	Alex Pullen et al.2011. Qaidam Basin and northern Tibetan Plateau as dust sources for the Chinese Loess Plateau and paleoclimatic implications.GEOLOGY.v. 39 no. 11 p. 1031-1034
299.9	1.6	modified	Alex Pullen et al.2011. Qaidam Basin and northern Tibetan Plateau as dust sources for the Chinese Loess Plateau and paleoclimatic implications.GEOLOGY.v. 39 no. 11 p. 1031-1034
301.1	1.2	modified	Alex Pullen et al.2011. Qaidam Basin and northern Tibetan Plateau as dust sources for the Chinese Loess Plateau and paleoclimatic implications.GEOLOGY.v. 39 no. 11 p. 1031-1034
301.1	1.6	modified	Alex Pullen et al.2011. Qaidam Basin and northern Tibetan Plateau as dust sources for the Chinese Loess Plateau and paleoclimatic implications.GEOLOGY.v. 39 no. 11 p. 1031-1034
302	3	modified	Alex Pullen et al.2011. Qaidam Basin and northern Tibetan Plateau as dust sources for the Chinese Loess Plateau and paleoclimatic implications.GEOLOGY.v. 39 no. 11 p. 1031-1034
309	8	modified	Alex Pullen et al.2011. Qaidam Basin and northern Tibetan Plateau as dust sources for the Chinese Loess Plateau and paleoclimatic implications.GEOLOGY.v. 39 no. 11 p. 1031-1034
313	5	modified	Alex Pullen et al.2011. Qaidam Basin and northern Tibetan Plateau as dust sources for the Chinese Loess Plateau and paleoclimatic implications.GEOLOGY.v. 39 no. 11 p. 1031-1034
323	4	modified	Alex Pullen et al.2011. Qaidam Basin and northern Tibetan Plateau as dust sources for the Chinese Loess Plateau and paleoclimatic implications.GEOLOGY.v. 39 no. 11 p. 1031-1034
329	1	modified	Alex Pullen et al.2011. Qaidam Basin and northern Tibetan Plateau as dust sources for the Chinese Loess Plateau and paleoclimatic implications.GEOLOGY.v. 39 no. 11 p. 1031-1034
336.6	6	modified	Alex Pullen et al.2011. Qaidam Basin and northern Tibetan Plateau as dust sources for the Chinese Loess Plateau and paleoclimatic implications.GEOLOGY.v. 39 no. 11 p. 1031-1034
340.9	2.5	modified	Alex Pullen et al.2011. Qaidam Basin and northern Tibetan Plateau as dust sources for the Chinese Loess Plateau and paleoclimatic implications.GEOLOGY.v. 39 no. 11 p. 1031-1034
345	2	modified	Alex Pullen et al.2011. Qaidam Basin and northern Tibetan Plateau as dust sources for the Chinese Loess Plateau and paleoclimatic implications.GEOLOGY.v. 39 no. 11 p. 1031-1034
345	2	modified	Alex Pullen et al.2011. Qaidam Basin and northern Tibetan Plateau as dust sources for the Chinese Loess Plateau and paleoclimatic implications.GEOLOGY.v. 39 no. 11 p. 1031-1034
345	1	modified	Alex Pullen et al.2011. Qaidam Basin and northern Tibetan Plateau as dust sources for the Chinese Loess Plateau and paleoclimatic implications.GEOLOGY.v. 39 no. 11 p. 1031-1034
348	1	modified	Alex Pullen et al.2011. Qaidam Basin and northern Tibetan Plateau as dust sources for the Chinese Loess Plateau and paleoclimatic implications.GEOLOGY.v. 39 no. 11 p. 1031-1034
350.4	1.7	modified	Alex Pullen et al.2011. Qaidam Basin and northern Tibetan Plateau as dust sources for the Chinese Loess Plateau and paleoclimatic implications.GEOLOGY.v. 39 no. 11 p. 1031-1034
357.6	5.7	modified	Alex Pullen et al.2011. Qaidam Basin and northern Tibetan Plateau as dust sources for the Chinese Loess Plateau and paleoclimatic implications.GEOLOGY.v. 39 no. 11 p. 1031-1034
357.8	3.2	modified	Alex Pullen et al.2011. Qaidam Basin and northern Tibetan Plateau as dust sources for the Chinese Loess Plateau and paleoclimatic implications.GEOLOGY.v. 39 no. 11 p. 1031-1034
358.7	5	modified	Alex Pullen et al.2011. Qaidam Basin and northern Tibetan Plateau as dust sources for the Chinese Loess Plateau and paleoclimatic implications.GEOLOGY.v. 39 no. 11 p. 1031-1034
360.5	1.1	modified	Alex Pullen et al.2011. Qaidam Basin and northern Tibetan Plateau as dust sources for the Chinese Loess Plateau and paleoclimatic implications.GEOLOGY.v. 39 no. 11 p. 1031-1034
363	3	modified	Alex Pullen et al.2011. Qaidam Basin and northern Tibetan Plateau as dust sources for the Chinese Loess Plateau and paleoclimatic implications.GEOLOGY.v. 39 no. 11 p. 1031-1034
363.6	3.9	modified	Alex Pullen et al.2011. Qaidam Basin and northern Tibetan Plateau as dust sources for the Chinese Loess Plateau and paleoclimatic implications.GEOLOGY.v. 39 no. 11 p. 1031-1034
365	4	modified	Alex Pullen et al.2011. Qaidam Basin and northern Tibetan Plateau as dust sources for the Chinese Loess Plateau and paleoclimatic implications.GEOLOGY.v. 39 no. 11 p. 1031-1034
371	2	modified	Alex Pullen et al.2011. Qaidam Basin and northern Tibetan Plateau as dust sources for the Chinese Loess Plateau and paleoclimatic implications.GEOLOGY.v. 39 no. 11 p. 1031-1034
384	2	modified	Alex Pullen et al.2011. Qaidam Basin and northern Tibetan Plateau as dust sources for the Chinese Loess Plateau and paleoclimatic implications.GEOLOGY.v. 39 no. 11 p. 1031-1034
385	5	modified	Alex Pullen et al.2011. Qaidam Basin and northern Tibetan Plateau as dust sources for the Chinese Loess Plateau and paleoclimatic implications.GEOLOGY.v. 39 no. 11 p. 1031-1034
396.3	3.3	modified	Alex Pullen et al.2011. Qaidam Basin and northern Tibetan Plateau as dust sources for the Chinese Loess Plateau and paleoclimatic implications.GEOLOGY.v. 39 no. 11 p. 1031-1034
397	3.2	modified	Alex Pullen et al.2011. Qaidam Basin and northern Tibetan Plateau as dust sources for the Chinese Loess Plateau and paleoclimatic implications.GEOLOGY.v. 39 no. 11 p. 1031-1034
397	4	modified	Alex Pullen et al.2011. Qaidam Basin and northern Tibetan Plateau as dust sources for the Chinese Loess Plateau and paleoclimatic implications.GEOLOGY.v. 39 no. 11 p. 1031-1034
399.1	1.1	modified	Alex Pullen et al.2011. Qaidam Basin and northern Tibetan Plateau as dust sources for the Chinese Loess Plateau and paleoclimatic implications.GEOLOGY.v. 39 no. 11 p. 1031-1034
410.8	2	modified	Alex Pullen et al.2011. Qaidam Basin and northern Tibetan Plateau as dust sources for the Chinese Loess Plateau and paleoclimatic implications.GEOLOGY.v. 39 no. 11 p. 1031-1034
417	2.2	modified	Alex Pullen et al.2011. Qaidam Basin and northern Tibetan Plateau as dust sources for the Chinese Loess Plateau and paleoclimatic implications.GEOLOGY.v. 39 no. 11 p. 1031-1034
421	3	modified	Alex Pullen et al.2011. Qaidam Basin and northern Tibetan Plateau as dust sources for the Chinese Loess Plateau and paleoclimatic implications.GEOLOGY.v. 39 no. 11 p. 1031-1034
458.2	3	modified	Alex Pullen et al.2011. Qaidam Basin and northern Tibetan Plateau as dust sources for the Chinese Loess Plateau and paleoclimatic implications.GEOLOGY.v. 39 no. 11 p. 1031-1034
467	22	modified	Alex Pullen et al.2011. Qaidam Basin and northern Tibetan Plateau as dust sources for the Chinese Loess Plateau and paleoclimatic implications.GEOLOGY.v. 39 no. 11 p. 1031-1034
477	7	modified	Alex Pullen et al.2011. Qaidam Basin and northern Tibetan Plateau as dust sources for the Chinese Loess Plateau and paleoclimatic implications.GEOLOGY.v. 39 no. 11 p. 1031-1034
490	8	modified	Alex Pullen et al.2011. Qaidam Basin and northern Tibetan Plateau as dust sources for the Chinese Loess Plateau and paleoclimatic implications.GEOLOGY.v. 39 no. 11 p. 1031-1034
493	2	modified	Alex Pullen et al.2011. Qaidam Basin and northern Tibetan Plateau as dust sources for the Chinese Loess Plateau and paleoclimatic implications.GEOLOGY.v. 39 no. 11 p. 1031-1034
498	3	modified	Alex Pullen et al.2011. Qaidam Basin and northern Tibetan Plateau as dust sources for the Chinese Loess Plateau and paleoclimatic implications.GEOLOGY.v. 39 no. 11 p. 1031-1034
498	3	modified	Alex Pullen et al.2011. Qaidam Basin and northern Tibetan Plateau as dust sources for the Chinese Loess Plateau and paleoclimatic implications.GEOLOGY.v. 39 no. 11 p. 1031-1034
499	3	modified	Alex Pullen et al.2011. Qaidam Basin and northern Tibetan Plateau as dust sources for the Chinese Loess Plateau and paleoclimatic implications.GEOLOGY.v. 39 no. 11 p. 1031-1034
500.8	2.8	modified	Alex Pullen et al.2011. Qaidam Basin and northern Tibetan Plateau as dust sources for the Chinese Loess Plateau and paleoclimatic implications.GEOLOGY.v. 39 no. 11 p. 1031-1034
501	4	modified	Alex Pullen et al.2011. Qaidam Basin and northern Tibetan Plateau as dust sources for the Chinese Loess Plateau and paleoclimatic implications.GEOLOGY.v. 39 no. 11 p. 1031-1034
501.2	4.87	modified	Alex Pullen et al.2011. Qaidam Basin and northern Tibetan Plateau as dust sources for the Chinese Loess Plateau and paleoclimatic implications.GEOLOGY.v. 39 no. 11 p. 1031-1034
502	6	modified	Alex Pullen et al.2011. Qaidam Basin and northern Tibetan Plateau as dust sources for the Chinese Loess Plateau and paleoclimatic implications.GEOLOGY.v. 39 no. 11 p. 1031-1034
502	31	modified	Alex Pullen et al.2011. Qaidam Basin and northern Tibetan Plateau as dust sources for the Chinese Loess Plateau and paleoclimatic implications.GEOLOGY.v. 39 no. 11 p. 1031-1034
511	5	modified	Alex Pullen et al.2011. Qaidam Basin and northern Tibetan Plateau as dust sources for the Chinese Loess Plateau and paleoclimatic implications.GEOLOGY.v. 39 no. 11 p. 1031-1034
513	4	modified	Alex Pullen et al.2011. Qaidam Basin and northern Tibetan Plateau as dust sources for the Chinese Loess Plateau and paleoclimatic implications.GEOLOGY.v. 39 no. 11 p. 1031-1034
517	5	modified	Alex Pullen et al.2011. Qaidam Basin and northern Tibetan Plateau as dust sources for the Chinese Loess Plateau and paleoclimatic implications.GEOLOGY.v. 39 no. 11 p. 1031-1034
518	5	modified	Alex Pullen et al.2011. Qaidam Basin and northern Tibetan Plateau as dust sources for the Chinese Loess Plateau and paleoclimatic implications.GEOLOGY.v. 39 no. 11 p. 1031-1034
529	9	modified	Alex Pullen et al.2011. Qaidam Basin and northern Tibetan Plateau as dust sources for the Chinese Loess Plateau and paleoclimatic implications.GEOLOGY.v. 39 no. 11 p. 1031-1034
538	2	modified	Alex Pullen et al.2011. Qaidam Basin and northern Tibetan Plateau as dust sources for the Chinese Loess Plateau and paleoclimatic implications.GEOLOGY.v. 39 no. 11 p. 1031-1034
542	4	modified	Alex Pullen et al.2011. Qaidam Basin and northern Tibetan Plateau as dust sources for the Chinese Loess Plateau and paleoclimatic implications.GEOLOGY.v. 39 no. 11 p. 1031-1034
568	4	modified	Alex Pullen et al.2011. Qaidam Basin and northern Tibetan Plateau as dust sources for the Chinese Loess Plateau and paleoclimatic implications.GEOLOGY.v. 39 no. 11 p. 1031-1034
568.1	4	modified	Alex Pullen et al.2011. Qaidam Basin and northern Tibetan Plateau as dust sources for the Chinese Loess Plateau and paleoclimatic implications.GEOLOGY.v. 39 no. 11 p. 1031-1034
740	20	modified	Alex Pullen et al.2011. Qaidam Basin and northern Tibetan Plateau as dust sources for the Chinese Loess Plateau and paleoclimatic implications.GEOLOGY.v. 39 no. 11 p. 1031-1034
777	6	modified	Alex Pullen et al.2011. Qaidam Basin and northern Tibetan Plateau as dust sources for the Chinese Loess Plateau and paleoclimatic implications.GEOLOGY.v. 39 no. 11 p. 1031-1034
813	15	modified	Alex Pullen et al.2011. Qaidam Basin and northern Tibetan Plateau as dust sources for the Chinese Loess Plateau and paleoclimatic implications.GEOLOGY.v. 39 no. 11 p. 1031-1034
840	9	modified	Alex Pullen et al.2011. Qaidam Basin and northern Tibetan Plateau as dust sources for the Chinese Loess Plateau and paleoclimatic implications.GEOLOGY.v. 39 no. 11 p. 1031-1034
886	3	modified	Alex Pullen et al.2011. Qaidam Basin and northern Tibetan Plateau as dust sources for the Chinese Loess Plateau and paleoclimatic implications.GEOLOGY.v. 39 no. 11 p. 1031-1034
916	16	modified	Alex Pullen et al.2011. Qaidam Basin and northern Tibetan Plateau as dust sources for the Chinese Loess Plateau and paleoclimatic implications.GEOLOGY.v. 39 no. 11 p. 1031-1034
940	44	modified	Alex Pullen et al.2011. Qaidam Basin and northern Tibetan Plateau as dust sources for the Chinese Loess Plateau and paleoclimatic implications.GEOLOGY.v. 39 no. 11 p. 1031-1034
950	16	modified	Alex Pullen et al.2011. Qaidam Basin and northern Tibetan Plateau as dust sources for the Chinese Loess Plateau and paleoclimatic implications.GEOLOGY.v. 39 no. 11 p. 1031-1034
954	8	modified	Alex Pullen et al.2011. Qaidam Basin and northern Tibetan Plateau as dust sources for the Chinese Loess Plateau and paleoclimatic implications.GEOLOGY.v. 39 no. 11 p. 1031-1034
956	3	modified	Alex Pullen et al.2011. Qaidam Basin and northern Tibetan Plateau as dust sources for the Chinese Loess Plateau and paleoclimatic implications.GEOLOGY.v. 39 no. 11 p. 1031-1034
973	12	modified	Alex Pullen et al.2011. Qaidam Basin and northern Tibetan Plateau as dust sources for the Chinese Loess Plateau and paleoclimatic implications.GEOLOGY.v. 39 no. 11 p. 1031-1034
983	6	modified	Alex Pullen et al.2011. Qaidam Basin and northern Tibetan Plateau as dust sources for the Chinese Loess Plateau and paleoclimatic implications.GEOLOGY.v. 39 no. 11 p. 1031-1034
1127	1	modified	Alex Pullen et al.2011. Qaidam Basin and northern Tibetan Plateau as dust sources for the Chinese Loess Plateau and paleoclimatic implications.GEOLOGY.v. 39 no. 11 p. 1031-1034
1166	36	modified	Alex Pullen et al.2011. Qaidam Basin and northern Tibetan Plateau as dust sources for the Chinese Loess Plateau and paleoclimatic implications.GEOLOGY.v. 39 no. 11 p. 1031-1034
1179	16	modified	Alex Pullen et al.2011. Qaidam Basin and northern Tibetan Plateau as dust sources for the Chinese Loess Plateau and paleoclimatic implications.GEOLOGY.v. 39 no. 11 p. 1031-1034
1493	33	modified	Alex Pullen et al.2011. Qaidam Basin and northern Tibetan Plateau as dust sources for the Chinese Loess Plateau and paleoclimatic implications.GEOLOGY.v. 39 no. 11 p. 1031-1034
1511	10	modified	Alex Pullen et al.2011. Qaidam Basin and northern Tibetan Plateau as dust sources for the Chinese Loess Plateau and paleoclimatic implications.GEOLOGY.v. 39 no. 11 p. 1031-1034
1519	11	modified	Alex Pullen et al.2011. Qaidam Basin and northern Tibetan Plateau as dust sources for the Chinese Loess Plateau and paleoclimatic implications.GEOLOGY.v. 39 no. 11 p. 1031-1034
1854	5	modified	Alex Pullen et al.2011. Qaidam Basin and northern Tibetan Plateau as dust sources for the Chinese Loess Plateau and paleoclimatic implications.GEOLOGY.v. 39 no. 11 p. 1031-1034
2364	6	modified	Alex Pullen et al.2011. Qaidam Basin and northern Tibetan Plateau as dust sources for the Chinese Loess Plateau and paleoclimatic implications.GEOLOGY.v. 39 no. 11 p. 1031-1034
2594	5	modified	Alex Pullen et al.2011. Qaidam Basin and northern Tibetan Plateau as dust sources for the Chinese Loess Plateau and paleoclimatic implications.GEOLOGY.v. 39 no. 11 p. 1031-1034
2650	30	modified	Alex Pullen et al.2011. Qaidam Basin and northern Tibetan Plateau as dust sources for the Chinese Loess Plateau and paleoclimatic implications.GEOLOGY.v. 39 no. 11 p. 1031-1034
270	1	Nd–Sr	Baofu Han et al.1997. Depleted-mantle source for the Ulungur River A-type granites from North Xinjiang, China: geochemistry and Nd–Sr isotopic evidence, and implications for Phanerozoic crustal growth.Chemical Geology.Volume 138, Issues 3–4, 10 June 1997, Pages 135–159
300	1	Nd–Sr	Baofu Han et al.1997. Depleted-mantle source for the Ulungur River A-type granites from North Xinjiang, China: geochemistry and Nd–Sr isotopic evidence, and implications for Phanerozoic crustal growth.Chemical Geology.Volume 138, Issues 3–4, 10 June 1997, Pages 135–159
274	3		Baofu Han et al.2004.SHRIMP zircon U-Pb ages of Kalatongke No.1 and Huangshandong Cu-Ni-bearing mafic-ultramafic complexes,North Xinjiang,and geological implications.CHINESE SCIENCE BULLETIN.49(22):
287	5		Baofu Han et al.2004.SHRIMP zircon U-Pb ages of Kalatongke No.1 and Huangshandong Cu-Ni-bearing mafic-ultramafic complexes,North Xinjiang,and geological implications.CHINESE SCIENCE BULLETIN.49(22):
403.9	4.8	SHRIMP	Baojiang Zhang. 2012. Shrimp U-Pb Age of the Amphibolite from Mengku Iron Deposit and its Geological Implications in Altay,Xinjiang.Xinjiang Geology. 30(3):277-282.
755	15	SHRIMP	Bei Xu et al.2005.U–Pb zircon geochronology and geochemistry of Neoproterozoic volcanic rocks in the Tarim Block of northwest China: implications for the breakup of Rodinia supercontinent and Neoproterozoic glaciations.Precambrian Research.Volume 136, Issue 2, 26 January 2005, Pages 107–123
286.4	2.8	SIMS	Benxun Su et al.2012. Geochronologic-petrochemical studies of the Hongshishan mafic–ultramafic intrusion, Beishan area, Xinjiang (NW China): petrogenesis and tectonic implications.Volume 54, Issue 3,pages 270-289
272.6	4.6	LA-ICP-MS	Bo Liu et al.2013. Timing of the South Tianshan suture zone: New evidence of zircon ages from the granitic plutons in Kokshal area.Geological Bulletin of China.32(9):1371-1384
275.1	6.2	LA-ICP-MS	Bo Liu et al.2013. Timing of the South Tianshan suture zone: New evidence of zircon ages from the granitic plutons in Kokshal area.Geological Bulletin of China.32(9):1371-1384
276.5	1.6	LA-ICP-MS	Bo Liu et al.2013. Timing of the South Tianshan suture zone: New evidence of zircon ages from the granitic plutons in Kokshal area.Geological Bulletin of China.32(9):1371-1384
277	2.1	LA-ICP-MS	Bo Liu et al.2013. Timing of the South Tianshan suture zone: New evidence of zircon ages from the granitic plutons in Kokshal area.Geological Bulletin of China.32(9):1371-1384
282.9	2.7	LA-ICP-MS	Bo Liu et al.2013. Timing of the South Tianshan suture zone: New evidence of zircon ages from the granitic plutons in Kokshal area.Geological Bulletin of China.32(9):1371-1384
283.1	1.5	LA-ICP-MS	Bo Liu et al.2013. Timing of the South Tianshan suture zone: New evidence of zircon ages from the granitic plutons in Kokshal area.Geological Bulletin of China.32(9):1371-1384
252	4	LA-ICP-MS	Bo Wang et al.2009. Evolution of calc-alkaline to alkaline magmatism through Carboniferous convergence to Permian transcurrent tectonics, western Chinese Tianshan.International Journal of Earth Sciences.September 2009, Volume 98, Issue 6, pp 1275-1298
266	6	LA-ICP-MS	Bo Wang et al.2009. Evolution of calc-alkaline to alkaline magmatism through Carboniferous convergence to Permian transcurrent tectonics, western Chinese Tianshan.International Journal of Earth Sciences.September 2009, Volume 98, Issue 6, pp 1275-1298
272.8	6	LA-ICP-MS	Bo Wang et al.2009. Evolution of calc-alkaline to alkaline magmatism through Carboniferous convergence to Permian transcurrent tectonics, western Chinese Tianshan.International Journal of Earth Sciences.September 2009, Volume 98, Issue 6, pp 1275-1298
277	3	LA-ICP-MS	Bo Wang et al.2009. Evolution of calc-alkaline to alkaline magmatism through Carboniferous convergence to Permian transcurrent tectonics, western Chinese Tianshan.International Journal of Earth Sciences.September 2009, Volume 98, Issue 6, pp 1275-1298
280	5	LA-ICP-MS	Bo Wang et al.2009. Evolution of calc-alkaline to alkaline magmatism through Carboniferous convergence to Permian transcurrent tectonics, western Chinese Tianshan.International Journal of Earth Sciences.September 2009, Volume 98, Issue 6, pp 1275-1298
293	0.5	LA-ICP-MS	Bo Wang et al.2009. Evolution of calc-alkaline to alkaline magmatism through Carboniferous convergence to Permian transcurrent tectonics, western Chinese Tianshan.International Journal of Earth Sciences.September 2009, Volume 98, Issue 6, pp 1275-1298
294	7	LA-ICP-MS	Bo Wang et al.2009. Evolution of calc-alkaline to alkaline magmatism through Carboniferous convergence to Permian transcurrent tectonics, western Chinese Tianshan.International Journal of Earth Sciences.September 2009, Volume 98, Issue 6, pp 1275-1298
942	6	LAMC- ICPMS	Botao Huang et al.2014. Zircon U-Pb and Hf isotopic study of Neoproterozoic granitic gneisses from the Alatage area, Xinjiang: constraints on the Precambrian crustal evolution in the Central Tianshan Block.Chinese Science Bulletin.59(1):100–112
945	6	LAMC- ICPMS	Botao Huang et al.2014. Zircon U-Pb and Hf isotopic study of Neoproterozoic granitic gneisses from the Alatage area, Xinjiang: constraints on the Precambrian crustal evolution in the Central Tianshan Block.Chinese Science Bulletin.59(1):100–112
274	4		Changyi Jiang et al.2006.Lithogeochemistry and petrogenesis of Zhongposhanbei mafic rock body, at Beishan region, Xinjiang.ACTA PETROLOGICA SINICA.22(1)
343.1	2.7	SIMS	Chao Li et al.2013. SIMS zircon U-Pb age of the plagiogranites from Kuitun River ophiolite and its tectonic implications.Chinese Journal of Geology.48(3):８１５— ８２６
298	2	LA-ICP-MS	Chuansheng Wang et al.2009. Petrogenesis and geological implications of the Permian high-K calc-alkaline granites in Harlik Mountains of eastern Tianshan, NW China.ACTA PETROLOGICA SINICA.25(6)
282.3	1.2	SIMS	Chunming Han et al.2013. SIMS U-Pb zircon dating and Re-Os isotopic analysis of the Hulu Cu-Ni deposit, eastern Tianshan, Central Asian Orogenic Belt, and its geological significance.Journal of Geosciences.58(3):255-274
390	11	LA-ICPMS	Dingwu Zhou et al.2004.Zircon U-Pb SHRIMP ages of high-pressure granulite in Yushugou ophiolitic terrane in southern Tianshan and their tectonic implications.Chinese Science Bulletin 2004 Vol. 49 No. 13 1415—1419
392	7	LA-ICPMS	Dingwu Zhou et al.2004.Zircon U-Pb SHRIMP ages of high-pressure granulite in Yushugou ophiolitic terrane in southern Tianshan and their tectonic implications.Chinese Science Bulletin 2004 Vol. 49 No. 13 1415—1419
280	2	SIMS	Dongmei Tang et al.2011.Zircon dating, Hf–Sr–Nd–Os isotopes and PGE geochemistry of the Tianyu sulfide-bearing mafic–ultramafic intrusion in the Central Asian Orogenic Belt, NW China.Lithos.126 (2011) 84–98
457.8	3.1	SHRIMP U-Pb ages	Feng Liu et al. 2008. SHRIJMP U-Pb Ages of the Abagong Granites in the Altay Orogen and Their Geological Implications.ACTA GEOSCIENTIA SINICA.29(6):795-840
462.5	3.6	SHRIMP U-Pb ages	Feng Liu et al. 2008. SHRIJMP U-Pb Ages of the Abagong Granites in the Altay Orogen and Their Geological Implications.ACTA GEOSCIENTIA SINICA.29(6):795-840
307	4	LA-ICP-MS	Feng yuan et al.2007.LA-ICPMS U-Pb age of zircon from basalt of Matoutan Group in Shilipo native copper mineralized area, eastern Tianshan, Xinjiang.ACTA PETROLOGICA SINICA.23(8)
406.5	5	LA-ICP-MS	Gang Huang et al.2011. Zircon LA-ICP-MS U-Pb age of plagiogranite from Tonghuashan ophiolite in Southern Tianshan Mountains and its geological implications.GEOLOGY IN CHINA.2011,(1):94-102
400	2.3	LA-ICP-MS	Guoren Liu et al. 2010. LA-ICP-MS U-Pb Zircon Dating and Geochemistry of the Devonian Granites from the Middle Kelan River Valley of Altay in Xinjiang.ACTA GEOSCIENTIA SINICA.31(4):
401	3.3	LA-ICP-MS	Guoren Liu et al. 2010. LA-ICP-MS U-Pb Zircon Dating and Geochemistry of the Devonian Granites from the Middle Kelan River Valley of Altay in Xinjiang.ACTA GEOSCIENTIA SINICA.31(4):
408	8	LA-ICPMS	Guoxue Song et al. 2010. The U-Pb ages, Hf isotope and REE patterns of older zircons from Devonian volcanic rocks in Ashele basin on the southern margin of Altai orogen and its geological significance.ACTA PETROLOGUICA SINICA.26(10): 2946-2958
2005	30	LA-ICPMS	Guoxue Song et al. 2010. The U-Pb ages, Hf isotope and REE patterns of older zircons from Devonian volcanic rocks in Ashele basin on the southern margin of Altai orogen and its geological significance.ACTA PETROLOGUICA SINICA.26(10): 2946-2958
419.9	2.1	LA-ICPMS	He Huang et al. 2013. Early Paleozoic Tectonic Evolution of the South Tianshan Collisional Belt: Evidence from Geochemistry and Zircon U-Pb Geochronology of the Tie’reke Monzonite Pluton, Northwest China.The Journal of Geology .Vol. 121, No. 4 (July 2013), pp. 401-424
322	10	SHRIMP	Hua wu et al.2006. Zircon SHRIMP U-Pb dating of plagiogranite porphyry in the Chihu molybdenum-copper district, Hami, East Tianshan.GEOLOGICAL BULLETIN OF CHINA.25(5):549-552
278	4	SHRIMP	Huaqin Li et al.2004.Zircon SHRIMP U-Pb Age and Strontium Isotopes of Mineralized Granitoids in the Sanchakou Copper Polymetallic Depoist, East Tianshan Mountains.ACTA GEOSCIENTICA SINICA.25(2)
278	2	SHRIMP	Huaqin Li et al.2006.Isotopic ages of No.1 intrusive body in Pobei mafic_ultramafic belt of Xinjiang and their geological significance.MINERAL DEPOSITS.25(4):463~469
263	6	LA-ICP-MS	Jia-Fu Chen et al.2010. Zircon U–Pb ages and tectonic implications of Paleozoic plutons in northern West Junggar, North Xinjiang, China.Lithos.Volume 115, Issues 1–4, March 2010, Pages 137–152
281	4	LA-ICP-MS	Jia-Fu Chen et al.2010. Zircon U–Pb ages and tectonic implications of Paleozoic plutons in northern West Junggar, North Xinjiang, China.Lithos.Volume 115, Issues 1–4, March 2010, Pages 137–152
290	4	LA-ICP-MS	Jia-Fu Chen et al.2010. Zircon U–Pb ages and tectonic implications of Paleozoic plutons in northern West Junggar, North Xinjiang, China.Lithos.Volume 115, Issues 1–4, March 2010, Pages 137–152
291	9	LA-ICP-MS	Jia-Fu Chen et al.2010. Zircon U–Pb ages and tectonic implications of Paleozoic plutons in northern West Junggar, North Xinjiang, China.Lithos.Volume 115, Issues 1–4, March 2010, Pages 137–152
298	5	LA-ICP-MS	Jia-Fu Chen et al.2010. Zircon U–Pb ages and tectonic implications of Paleozoic plutons in northern West Junggar, North Xinjiang, China.Lithos.Volume 115, Issues 1–4, March 2010, Pages 137–152
302	2	LA-ICP-MS	Jia-Fu Chen et al.2010. Zircon U–Pb ages and tectonic implications of Paleozoic plutons in northern West Junggar, North Xinjiang, China.Lithos.Volume 115, Issues 1–4, March 2010, Pages 137–152
302	2	LA-ICP-MS	Jia-Fu Chen et al.2010. Zircon U–Pb ages and tectonic implications of Paleozoic plutons in northern West Junggar, North Xinjiang, China.Lithos.Volume 115, Issues 1–4, March 2010, Pages 137–152
303	8	LA-ICP-MS	Jia-Fu Chen et al.2010. Zircon U–Pb ages and tectonic implications of Paleozoic plutons in northern West Junggar, North Xinjiang, China.Lithos.Volume 115, Issues 1–4, March 2010, Pages 137–152
304	2	LA-ICP-MS	Jia-Fu Chen et al.2010. Zircon U–Pb ages and tectonic implications of Paleozoic plutons in northern West Junggar, North Xinjiang, China.Lithos.Volume 115, Issues 1–4, March 2010, Pages 137–152
321	5	LA-ICP-MS	Jia-Fu Chen et al.2010. Zircon U–Pb ages and tectonic implications of Paleozoic plutons in northern West Junggar, North Xinjiang, China.Lithos.Volume 115, Issues 1–4, March 2010, Pages 137–152
324	6	LA-ICP-MS	Jia-Fu Chen et al.2010. Zircon U–Pb ages and tectonic implications of Paleozoic plutons in northern West Junggar, North Xinjiang, China.Lithos.Volume 115, Issues 1–4, March 2010, Pages 137–152
325	3	LA-ICP-MS	Jia-Fu Chen et al.2010. Zircon U–Pb ages and tectonic implications of Paleozoic plutons in northern West Junggar, North Xinjiang, China.Lithos.Volume 115, Issues 1–4, March 2010, Pages 137–152
325	4	LA-ICP-MS	Jia-Fu Chen et al.2010. Zircon U–Pb ages and tectonic implications of Paleozoic plutons in northern West Junggar, North Xinjiang, China.Lithos.Volume 115, Issues 1–4, March 2010, Pages 137–152
328	6	LA-ICP-MS	Jia-Fu Chen et al.2010. Zircon U–Pb ages and tectonic implications of Paleozoic plutons in northern West Junggar, North Xinjiang, China.Lithos.Volume 115, Issues 1–4, March 2010, Pages 137–152
332	3	LA-ICP-MS	Jia-Fu Chen et al.2010. Zircon U–Pb ages and tectonic implications of Paleozoic plutons in northern West Junggar, North Xinjiang, China.Lithos.Volume 115, Issues 1–4, March 2010, Pages 137–152
332	3	LA-ICP-MS	Jia-Fu Chen et al.2010. Zircon U–Pb ages and tectonic implications of Paleozoic plutons in northern West Junggar, North Xinjiang, China.Lithos.Volume 115, Issues 1–4, March 2010, Pages 137–152
333	3	LA-ICP-MS	Jia-Fu Chen et al.2010. Zircon U–Pb ages and tectonic implications of Paleozoic plutons in northern West Junggar, North Xinjiang, China.Lithos.Volume 115, Issues 1–4, March 2010, Pages 137–152
338	4	LA-ICP-MS	Jia-Fu Chen et al.2010. Zircon U–Pb ages and tectonic implications of Paleozoic plutons in northern West Junggar, North Xinjiang, China.Lithos.Volume 115, Issues 1–4, March 2010, Pages 137–152
345	3	LA-ICP-MS	Jia-Fu Chen et al.2010. Zircon U–Pb ages and tectonic implications of Paleozoic plutons in northern West Junggar, North Xinjiang, China.Lithos.Volume 115, Issues 1–4, March 2010, Pages 137–152
405	4	LA-ICP-MS	Jia-Fu Chen et al.2010. Zircon U–Pb ages and tectonic implications of Paleozoic plutons in northern West Junggar, North Xinjiang, China.Lithos.Volume 115, Issues 1–4, March 2010, Pages 137–152
410	3	LA-ICP-MS	Jia-Fu Chen et al.2010. Zircon U–Pb ages and tectonic implications of Paleozoic plutons in northern West Junggar, North Xinjiang, China.Lithos.Volume 115, Issues 1–4, March 2010, Pages 137–152
414	5	LA-ICP-MS	Jia-Fu Chen et al.2010. Zircon U–Pb ages and tectonic implications of Paleozoic plutons in northern West Junggar, North Xinjiang, China.Lithos.Volume 115, Issues 1–4, March 2010, Pages 137–152
417	4	LA-ICP-MS	Jia-Fu Chen et al.2010. Zircon U–Pb ages and tectonic implications of Paleozoic plutons in northern West Junggar, North Xinjiang, China.Lithos.Volume 115, Issues 1–4, March 2010, Pages 137–152
417	5	LA-ICP-MS	Jia-Fu Chen et al.2010. Zircon U–Pb ages and tectonic implications of Paleozoic plutons in northern West Junggar, North Xinjiang, China.Lithos.Volume 115, Issues 1–4, March 2010, Pages 137–152
419	2	LA-ICP-MS	Jia-Fu Chen et al.2010. Zircon U–Pb ages and tectonic implications of Paleozoic plutons in northern West Junggar, North Xinjiang, China.Lithos.Volume 115, Issues 1–4, March 2010, Pages 137–152
420	4	LA-ICP-MS	Jia-Fu Chen et al.2010. Zircon U–Pb ages and tectonic implications of Paleozoic plutons in northern West Junggar, North Xinjiang, China.Lithos.Volume 115, Issues 1–4, March 2010, Pages 137–152
420	5	LA-ICP-MS	Jia-Fu Chen et al.2010. Zircon U–Pb ages and tectonic implications of Paleozoic plutons in northern West Junggar, North Xinjiang, China.Lithos.Volume 115, Issues 1–4, March 2010, Pages 137–152
422	2	LA-ICP-MS	Jia-Fu Chen et al.2010. Zircon U–Pb ages and tectonic implications of Paleozoic plutons in northern West Junggar, North Xinjiang, China.Lithos.Volume 115, Issues 1–4, March 2010, Pages 137–152
300.5	3.2	SHRIMP	Jiangang Jiao et al. 2013. SHRIMP Zircon U-Pb Age of the No.3 Intrusion in the Tulargen Cu-Ni Mining Area, East Tianshan Mountains, Xinjiang, and its Geological Significance.GEOLOGY AND PROSPECTING.49(3):385-393
351	4	SHRIMP	Jiangang Jiao et al. 2013. SHRIMP Zircon U-Pb Age of the No.3 Intrusion in the Tulargen Cu-Ni Mining Area, East Tianshan Mountains, Xinjiang, and its Geological Significance.GEOLOGY AND PROSPECTING.49(3):385-393
357.5	2.5	SHRIMP	Jiangang Jiao et al. 2013. SHRIMP Zircon U-Pb Age of the No.3 Intrusion in the Tulargen Cu-Ni Mining Area, East Tianshan Mountains, Xinjiang, and its Geological Significance.GEOLOGY AND PROSPECTING.49(3):385-393
253	3		Jianping Zhang et al.2005.Geochemistry and zircon U-Pb ages of granulite xenolith from Tuoyun basalts, Xinjiang: Implications for the petrogenesis and the lower crustal nature beneath the southwestern Tianshan.Chinese Science Bulletin.June 2005, Volume 50, Issue 12, pp 1242-1251
282	20	Re-Os	Jingwen Mao et al.2010. Re-Os Age of Cu-Ni Ores from the Huangshandong Cu-Ni Sulfide Deposit in the East Tianshan Mountains and Its Implication for Geodynamic Processes.Acta Geologica Sinica - English Edition.Volume 77, Issue 2, pages 220–226, June 2003
407.3	9.2	U-Pb ages	Jinhong Zhang et al.2000. Characteristics and U-Pb ages of zircon in metavolcanics from the Kangbutiebao Formation in the Altay orogen, Xinjiang.REGIONAL GEOLOGY OF CHINA.19(3):281-287
420.2	6	LA-ICP-MS	Johan De Grave et al. 2013. Thermo-tectonic history of the Issyk-Kul basement. Gondwana Research 23: 998–1020.
430.9	5.8	LA-ICP-MS	Johan De Grave et al. 2013. Thermo-tectonic history of the Issyk-Kul basement. Gondwana Research 23: 998–1020.
434.2	6.5	LA-ICP-MS	Johan De Grave et al. 2013. Thermo-tectonic history of the Issyk-Kul basement. Gondwana Research 23: 998–1020.
442	7.4	LA-ICP-MS	Johan De Grave et al. 2013. Thermo-tectonic history of the Issyk-Kul basement. Gondwana Research 23: 998–1020.
444.8	7	LA-ICP-MS	Johan De Grave et al. 2013. Thermo-tectonic history of the Issyk-Kul basement. Gondwana Research 23: 998–1020.
451.9	3.7	LA-ICP-MS	Johan De Grave et al. 2013. Thermo-tectonic history of the Issyk-Kul basement. Gondwana Research 23: 998–1020.
456.4	7.7	LA-ICP-MS	Johan De Grave et al. 2013. Thermo-tectonic history of the Issyk-Kul basement. Gondwana Research 23: 998–1020.
275	3	modified	Jun Gao et al. 2009. Tectonic evolution of the South Tianshan orogen and adjacent regions, NW China: geochemical and age constraints of granitoid rocks. Int J Earth Sci (Geol Rundsch) 98:1221–1238.
349	6	modified	Jun Gao et al. 2009. Tectonic evolution of the South Tianshan orogen and adjacent regions, NW China: geochemical and age constraints of granitoid rocks. Int J Earth Sci (Geol Rundsch) 98:1221–1238.
352	6	modified	Jun Gao et al. 2009. Tectonic evolution of the South Tianshan orogen and adjacent regions, NW China: geochemical and age constraints of granitoid rocks. Int J Earth Sci (Geol Rundsch) 98:1221–1238.
398.3	1.1	modified	Jun Gao et al. 2009. Tectonic evolution of the South Tianshan orogen and adjacent regions, NW China: geochemical and age constraints of granitoid rocks. Int J Earth Sci (Geol Rundsch) 98:1221–1238.
401.1	1.2	modified	Jun Gao et al. 2009. Tectonic evolution of the South Tianshan orogen and adjacent regions, NW China: geochemical and age constraints of granitoid rocks. Int J Earth Sci (Geol Rundsch) 98:1221–1238.
412.6	1.6	modified	Jun Gao et al. 2009. Tectonic evolution of the South Tianshan orogen and adjacent regions, NW China: geochemical and age constraints of granitoid rocks. Int J Earth Sci (Geol Rundsch) 98:1221–1238.
419	1.8	modified	Jun Gao et al. 2009. Tectonic evolution of the South Tianshan orogen and adjacent regions, NW China: geochemical and age constraints of granitoid rocks. Int J Earth Sci (Geol Rundsch) 98:1221–1238.
433	6	modified	Jun Gao et al. 2009. Tectonic evolution of the South Tianshan orogen and adjacent regions, NW China: geochemical and age constraints of granitoid rocks. Int J Earth Sci (Geol Rundsch) 98:1221–1238.
478.7	1.8	modified	Jun Gao et al. 2009. Tectonic evolution of the South Tianshan orogen and adjacent regions, NW China: geochemical and age constraints of granitoid rocks. Int J Earth Sci (Geol Rundsch) 98:1221–1238.
285	1		Kezhang Qin et al.2003. Overview of major Au, Cu, Ni and Fe deposits and metallogenic evolution of the eastern Tianshan Mountains, northwestern China. IAGOD Guidebook Series 10(Pages 227-248
251.4	1.8	modified	KE-ZHANG QIN et al.2011. SIMS zircon U-Pb geochronology and Sr-Nd isotopes of Ni-Cu-Bearing Mafic-Ultramafic Intrusions in Eastern Tianshan and Beishan in correlation with flood basalts in Tarim Basin (NW China): Constraints on a ca. 280 Ma mantle plume.A_x0000__x0000__x0000__x0000__x0000__x0000__x0000__x0000__x0000__x0000__x0000__x0000__x0000__x0000__x0000__x0000__x0000__x0000__x0000__x0000__x00…
260.7	2	modified	KE-ZHANG QIN et al.2011. SIMS zircon U-Pb geochronology and Sr-Nd isotopes of Ni-Cu-Bearing Mafic-Ultramafic Intrusions in Eastern Tianshan and Beishan in correlation with flood basalts in Tarim Basin (NW China): Constraints on a ca. 280 Ma mantle plume.A_x0000__x0000__x0000__x0000__x0000__x0000__x0000__x0000__x0000__x0000__x0000__x0000__x0000__x0000__x0000__x0000__x0000__x0000__x0000__x0000__x00…
268.9	4.2	modified	KE-ZHANG QIN et al.2011. SIMS zircon U-Pb geochronology and Sr-Nd isotopes of Ni-Cu-Bearing Mafic-Ultramafic Intrusions in Eastern Tianshan and Beishan in correlation with flood basalts in Tarim Basin (NW China): Constraints on a ca. 280 Ma mantle plume.A_x0000__x0000__x0000__x0000__x0000__x0000__x0000__x0000__x0000__x0000__x0000__x0000__x0000__x0000__x0000__x0000__x0000__x0000__x0000__x0000__x00…
269	2	modified	KE-ZHANG QIN et al.2011. SIMS zircon U-Pb geochronology and Sr-Nd isotopes of Ni-Cu-Bearing Mafic-Ultramafic Intrusions in Eastern Tianshan and Beishan in correlation with flood basalts in Tarim Basin (NW China): Constraints on a ca. 280 Ma mantle plume.A_x0000__x0000__x0000__x0000__x0000__x0000__x0000__x0000__x0000__x0000__x0000__x0000__x0000__x0000__x0000__x0000__x0000__x0000__x0000__x0000__x00…
269.2	3.2	modified	KE-ZHANG QIN et al.2011. SIMS zircon U-Pb geochronology and Sr-Nd isotopes of Ni-Cu-Bearing Mafic-Ultramafic Intrusions in Eastern Tianshan and Beishan in correlation with flood basalts in Tarim Basin (NW China): Constraints on a ca. 280 Ma mantle plume.A_x0000__x0000__x0000__x0000__x0000__x0000__x0000__x0000__x0000__x0000__x0000__x0000__x0000__x0000__x0000__x0000__x0000__x0000__x0000__x0000__x00…
271	6.2	modified	KE-ZHANG QIN et al.2011. SIMS zircon U-Pb geochronology and Sr-Nd isotopes of Ni-Cu-Bearing Mafic-Ultramafic Intrusions in Eastern Tianshan and Beishan in correlation with flood basalts in Tarim Basin (NW China): Constraints on a ca. 280 Ma mantle plume.A_x0000__x0000__x0000__x0000__x0000__x0000__x0000__x0000__x0000__x0000__x0000__x0000__x0000__x0000__x0000__x0000__x0000__x0000__x0000__x0000__x00…
271.1	3.5	modified	KE-ZHANG QIN et al.2011. SIMS zircon U-Pb geochronology and Sr-Nd isotopes of Ni-Cu-Bearing Mafic-Ultramafic Intrusions in Eastern Tianshan and Beishan in correlation with flood basalts in Tarim Basin (NW China): Constraints on a ca. 280 Ma mantle plume.A_x0000__x0000__x0000__x0000__x0000__x0000__x0000__x0000__x0000__x0000__x0000__x0000__x0000__x0000__x0000__x0000__x0000__x0000__x0000__x0000__x00…
271.7	2.2	modified	KE-ZHANG QIN et al.2011. SIMS zircon U-Pb geochronology and Sr-Nd isotopes of Ni-Cu-Bearing Mafic-Ultramafic Intrusions in Eastern Tianshan and Beishan in correlation with flood basalts in Tarim Basin (NW China): Constraints on a ca. 280 Ma mantle plume.A_x0000__x0000__x0000__x0000__x0000__x0000__x0000__x0000__x0000__x0000__x0000__x0000__x0000__x0000__x0000__x0000__x0000__x0000__x0000__x0000__x00…
272	6	modified	KE-ZHANG QIN et al.2011. SIMS zircon U-Pb geochronology and Sr-Nd isotopes of Ni-Cu-Bearing Mafic-Ultramafic Intrusions in Eastern Tianshan and Beishan in correlation with flood basalts in Tarim Basin (NW China): Constraints on a ca. 280 Ma mantle plume.A_x0000__x0000__x0000__x0000__x0000__x0000__x0000__x0000__x0000__x0000__x0000__x0000__x0000__x0000__x0000__x0000__x0000__x0000__x0000__x0000__x00…
272.9	4	modified	KE-ZHANG QIN et al.2011. SIMS zircon U-Pb geochronology and Sr-Nd isotopes of Ni-Cu-Bearing Mafic-Ultramafic Intrusions in Eastern Tianshan and Beishan in correlation with flood basalts in Tarim Basin (NW China): Constraints on a ca. 280 Ma mantle plume.A_x0000__x0000__x0000__x0000__x0000__x0000__x0000__x0000__x0000__x0000__x0000__x0000__x0000__x0000__x0000__x0000__x0000__x0000__x0000__x0000__x00…
273	3.7	modified	KE-ZHANG QIN et al.2011. SIMS zircon U-Pb geochronology and Sr-Nd isotopes of Ni-Cu-Bearing Mafic-Ultramafic Intrusions in Eastern Tianshan and Beishan in correlation with flood basalts in Tarim Basin (NW China): Constraints on a ca. 280 Ma mantle plume.A_x0000__x0000__x0000__x0000__x0000__x0000__x0000__x0000__x0000__x0000__x0000__x0000__x0000__x0000__x0000__x0000__x0000__x0000__x0000__x0000__x00…
273	13.5	modified	KE-ZHANG QIN et al.2011. SIMS zircon U-Pb geochronology and Sr-Nd isotopes of Ni-Cu-Bearing Mafic-Ultramafic Intrusions in Eastern Tianshan and Beishan in correlation with flood basalts in Tarim Basin (NW China): Constraints on a ca. 280 Ma mantle plume.A_x0000__x0000__x0000__x0000__x0000__x0000__x0000__x0000__x0000__x0000__x0000__x0000__x0000__x0000__x0000__x0000__x0000__x0000__x0000__x0000__x00…
273.8	6.3	modified	KE-ZHANG QIN et al.2011. SIMS zircon U-Pb geochronology and Sr-Nd isotopes of Ni-Cu-Bearing Mafic-Ultramafic Intrusions in Eastern Tianshan and Beishan in correlation with flood basalts in Tarim Basin (NW China): Constraints on a ca. 280 Ma mantle plume.A_x0000__x0000__x0000__x0000__x0000__x0000__x0000__x0000__x0000__x0000__x0000__x0000__x0000__x0000__x0000__x0000__x0000__x0000__x0000__x0000__x00…
274	15	modified	KE-ZHANG QIN et al.2011. SIMS zircon U-Pb geochronology and Sr-Nd isotopes of Ni-Cu-Bearing Mafic-Ultramafic Intrusions in Eastern Tianshan and Beishan in correlation with flood basalts in Tarim Basin (NW China): Constraints on a ca. 280 Ma mantle plume.A_x0000__x0000__x0000__x0000__x0000__x0000__x0000__x0000__x0000__x0000__x0000__x0000__x0000__x0000__x0000__x0000__x0000__x0000__x0000__x0000__x00…
274	2	modified	KE-ZHANG QIN et al.2011. SIMS zircon U-Pb geochronology and Sr-Nd isotopes of Ni-Cu-Bearing Mafic-Ultramafic Intrusions in Eastern Tianshan and Beishan in correlation with flood basalts in Tarim Basin (NW China): Constraints on a ca. 280 Ma mantle plume.A_x0000__x0000__x0000__x0000__x0000__x0000__x0000__x0000__x0000__x0000__x0000__x0000__x0000__x0000__x0000__x0000__x0000__x0000__x0000__x0000__x00…
274	4	modified	KE-ZHANG QIN et al.2011. SIMS zircon U-Pb geochronology and Sr-Nd isotopes of Ni-Cu-Bearing Mafic-Ultramafic Intrusions in Eastern Tianshan and Beishan in correlation with flood basalts in Tarim Basin (NW China): Constraints on a ca. 280 Ma mantle plume.A_x0000__x0000__x0000__x0000__x0000__x0000__x0000__x0000__x0000__x0000__x0000__x0000__x0000__x0000__x0000__x0000__x0000__x0000__x0000__x0000__x00…
274	3	modified	KE-ZHANG QIN et al.2011. SIMS zircon U-Pb geochronology and Sr-Nd isotopes of Ni-Cu-Bearing Mafic-Ultramafic Intrusions in Eastern Tianshan and Beishan in correlation with flood basalts in Tarim Basin (NW China): Constraints on a ca. 280 Ma mantle plume.A_x0000__x0000__x0000__x0000__x0000__x0000__x0000__x0000__x0000__x0000__x0000__x0000__x0000__x0000__x0000__x0000__x0000__x0000__x0000__x0000__x00…
274	3.9	modified	KE-ZHANG QIN et al.2011. SIMS zircon U-Pb geochronology and Sr-Nd isotopes of Ni-Cu-Bearing Mafic-Ultramafic Intrusions in Eastern Tianshan and Beishan in correlation with flood basalts in Tarim Basin (NW China): Constraints on a ca. 280 Ma mantle plume.A_x0000__x0000__x0000__x0000__x0000__x0000__x0000__x0000__x0000__x0000__x0000__x0000__x0000__x0000__x0000__x0000__x0000__x0000__x0000__x0000__x00…
275	13	modified	KE-ZHANG QIN et al.2011. SIMS zircon U-Pb geochronology and Sr-Nd isotopes of Ni-Cu-Bearing Mafic-Ultramafic Intrusions in Eastern Tianshan and Beishan in correlation with flood basalts in Tarim Basin (NW China): Constraints on a ca. 280 Ma mantle plume.A_x0000__x0000__x0000__x0000__x0000__x0000__x0000__x0000__x0000__x0000__x0000__x0000__x0000__x0000__x0000__x0000__x0000__x0000__x0000__x0000__x00…
275.5	1.2	modified	KE-ZHANG QIN et al.2011. SIMS zircon U-Pb geochronology and Sr-Nd isotopes of Ni-Cu-Bearing Mafic-Ultramafic Intrusions in Eastern Tianshan and Beishan in correlation with flood basalts in Tarim Basin (NW China): Constraints on a ca. 280 Ma mantle plume.A_x0000__x0000__x0000__x0000__x0000__x0000__x0000__x0000__x0000__x0000__x0000__x0000__x0000__x0000__x0000__x0000__x0000__x0000__x0000__x0000__x00…
276	3	modified	KE-ZHANG QIN et al.2011. SIMS zircon U-Pb geochronology and Sr-Nd isotopes of Ni-Cu-Bearing Mafic-Ultramafic Intrusions in Eastern Tianshan and Beishan in correlation with flood basalts in Tarim Basin (NW China): Constraints on a ca. 280 Ma mantle plume.A_x0000__x0000__x0000__x0000__x0000__x0000__x0000__x0000__x0000__x0000__x0000__x0000__x0000__x0000__x0000__x0000__x0000__x0000__x0000__x0000__x00…
276.8	3.4	modified	KE-ZHANG QIN et al.2011. SIMS zircon U-Pb geochronology and Sr-Nd isotopes of Ni-Cu-Bearing Mafic-Ultramafic Intrusions in Eastern Tianshan and Beishan in correlation with flood basalts in Tarim Basin (NW China): Constraints on a ca. 280 Ma mantle plume.A_x0000__x0000__x0000__x0000__x0000__x0000__x0000__x0000__x0000__x0000__x0000__x0000__x0000__x0000__x0000__x0000__x0000__x0000__x0000__x0000__x00…
277	4	modified	KE-ZHANG QIN et al.2011. SIMS zircon U-Pb geochronology and Sr-Nd isotopes of Ni-Cu-Bearing Mafic-Ultramafic Intrusions in Eastern Tianshan and Beishan in correlation with flood basalts in Tarim Basin (NW China): Constraints on a ca. 280 Ma mantle plume.A_x0000__x0000__x0000__x0000__x0000__x0000__x0000__x0000__x0000__x0000__x0000__x0000__x0000__x0000__x0000__x0000__x0000__x0000__x0000__x0000__x00…
277	1.6	modified	KE-ZHANG QIN et al.2011. SIMS zircon U-Pb geochronology and Sr-Nd isotopes of Ni-Cu-Bearing Mafic-Ultramafic Intrusions in Eastern Tianshan and Beishan in correlation with flood basalts in Tarim Basin (NW China): Constraints on a ca. 280 Ma mantle plume.A_x0000__x0000__x0000__x0000__x0000__x0000__x0000__x0000__x0000__x0000__x0000__x0000__x0000__x0000__x0000__x0000__x0000__x0000__x0000__x0000__x00…
277.3	2.5	modified	KE-ZHANG QIN et al.2011. SIMS zircon U-Pb geochronology and Sr-Nd isotopes of Ni-Cu-Bearing Mafic-Ultramafic Intrusions in Eastern Tianshan and Beishan in correlation with flood basalts in Tarim Basin (NW China): Constraints on a ca. 280 Ma mantle plume.A_x0000__x0000__x0000__x0000__x0000__x0000__x0000__x0000__x0000__x0000__x0000__x0000__x0000__x0000__x0000__x0000__x0000__x0000__x0000__x0000__x00…
277.7	1.3	modified	KE-ZHANG QIN et al.2011. SIMS zircon U-Pb geochronology and Sr-Nd isotopes of Ni-Cu-Bearing Mafic-Ultramafic Intrusions in Eastern Tianshan and Beishan in correlation with flood basalts in Tarim Basin (NW China): Constraints on a ca. 280 Ma mantle plume.A_x0000__x0000__x0000__x0000__x0000__x0000__x0000__x0000__x0000__x0000__x0000__x0000__x0000__x0000__x0000__x0000__x0000__x0000__x0000__x0000__x00…
278	1	modified	KE-ZHANG QIN et al.2011. SIMS zircon U-Pb geochronology and Sr-Nd isotopes of Ni-Cu-Bearing Mafic-Ultramafic Intrusions in Eastern Tianshan and Beishan in correlation with flood basalts in Tarim Basin (NW China): Constraints on a ca. 280 Ma mantle plume.A_x0000__x0000__x0000__x0000__x0000__x0000__x0000__x0000__x0000__x0000__x0000__x0000__x0000__x0000__x0000__x0000__x0000__x0000__x0000__x0000__x00…
278	1.3	modified	KE-ZHANG QIN et al.2011. SIMS zircon U-Pb geochronology and Sr-Nd isotopes of Ni-Cu-Bearing Mafic-Ultramafic Intrusions in Eastern Tianshan and Beishan in correlation with flood basalts in Tarim Basin (NW China): Constraints on a ca. 280 Ma mantle plume.A_x0000__x0000__x0000__x0000__x0000__x0000__x0000__x0000__x0000__x0000__x0000__x0000__x0000__x0000__x0000__x0000__x0000__x0000__x0000__x0000__x00…
278	2	modified	KE-ZHANG QIN et al.2011. SIMS zircon U-Pb geochronology and Sr-Nd isotopes of Ni-Cu-Bearing Mafic-Ultramafic Intrusions in Eastern Tianshan and Beishan in correlation with flood basalts in Tarim Basin (NW China): Constraints on a ca. 280 Ma mantle plume.A_x0000__x0000__x0000__x0000__x0000__x0000__x0000__x0000__x0000__x0000__x0000__x0000__x0000__x0000__x0000__x0000__x0000__x0000__x0000__x0000__x00…
278.5	1.4	modified	KE-ZHANG QIN et al.2011. SIMS zircon U-Pb geochronology and Sr-Nd isotopes of Ni-Cu-Bearing Mafic-Ultramafic Intrusions in Eastern Tianshan and Beishan in correlation with flood basalts in Tarim Basin (NW China): Constraints on a ca. 280 Ma mantle plume.A_x0000__x0000__x0000__x0000__x0000__x0000__x0000__x0000__x0000__x0000__x0000__x0000__x0000__x0000__x0000__x0000__x0000__x0000__x0000__x0000__x00…
279	4.5	modified	KE-ZHANG QIN et al.2011. SIMS zircon U-Pb geochronology and Sr-Nd isotopes of Ni-Cu-Bearing Mafic-Ultramafic Intrusions in Eastern Tianshan and Beishan in correlation with flood basalts in Tarim Basin (NW China): Constraints on a ca. 280 Ma mantle plume.A_x0000__x0000__x0000__x0000__x0000__x0000__x0000__x0000__x0000__x0000__x0000__x0000__x0000__x0000__x0000__x0000__x0000__x0000__x0000__x0000__x00…
279.6	1.1	modified	KE-ZHANG QIN et al.2011. SIMS zircon U-Pb geochronology and Sr-Nd isotopes of Ni-Cu-Bearing Mafic-Ultramafic Intrusions in Eastern Tianshan and Beishan in correlation with flood basalts in Tarim Basin (NW China): Constraints on a ca. 280 Ma mantle plume.A_x0000__x0000__x0000__x0000__x0000__x0000__x0000__x0000__x0000__x0000__x0000__x0000__x0000__x0000__x0000__x0000__x0000__x0000__x0000__x0000__x00…
280	2	modified	KE-ZHANG QIN et al.2011. SIMS zircon U-Pb geochronology and Sr-Nd isotopes of Ni-Cu-Bearing Mafic-Ultramafic Intrusions in Eastern Tianshan and Beishan in correlation with flood basalts in Tarim Basin (NW China): Constraints on a ca. 280 Ma mantle plume.A_x0000__x0000__x0000__x0000__x0000__x0000__x0000__x0000__x0000__x0000__x0000__x0000__x0000__x0000__x0000__x0000__x0000__x0000__x0000__x0000__x00…
281	4	modified	KE-ZHANG QIN et al.2011. SIMS zircon U-Pb geochronology and Sr-Nd isotopes of Ni-Cu-Bearing Mafic-Ultramafic Intrusions in Eastern Tianshan and Beishan in correlation with flood basalts in Tarim Basin (NW China): Constraints on a ca. 280 Ma mantle plume.A_x0000__x0000__x0000__x0000__x0000__x0000__x0000__x0000__x0000__x0000__x0000__x0000__x0000__x0000__x0000__x0000__x0000__x0000__x0000__x0000__x00…
281.2	0.9	modified	KE-ZHANG QIN et al.2011. SIMS zircon U-Pb geochronology and Sr-Nd isotopes of Ni-Cu-Bearing Mafic-Ultramafic Intrusions in Eastern Tianshan and Beishan in correlation with flood basalts in Tarim Basin (NW China): Constraints on a ca. 280 Ma mantle plume.A_x0000__x0000__x0000__x0000__x0000__x0000__x0000__x0000__x0000__x0000__x0000__x0000__x0000__x0000__x0000__x0000__x0000__x0000__x0000__x0000__x00…
281.8	4.2	modified	KE-ZHANG QIN et al.2011. SIMS zircon U-Pb geochronology and Sr-Nd isotopes of Ni-Cu-Bearing Mafic-Ultramafic Intrusions in Eastern Tianshan and Beishan in correlation with flood basalts in Tarim Basin (NW China): Constraints on a ca. 280 Ma mantle plume.A_x0000__x0000__x0000__x0000__x0000__x0000__x0000__x0000__x0000__x0000__x0000__x0000__x0000__x0000__x0000__x0000__x0000__x0000__x0000__x0000__x00…
281.8	2.6	modified	KE-ZHANG QIN et al.2011. SIMS zircon U-Pb geochronology and Sr-Nd isotopes of Ni-Cu-Bearing Mafic-Ultramafic Intrusions in Eastern Tianshan and Beishan in correlation with flood basalts in Tarim Basin (NW China): Constraints on a ca. 280 Ma mantle plume.A_x0000__x0000__x0000__x0000__x0000__x0000__x0000__x0000__x0000__x0000__x0000__x0000__x0000__x0000__x0000__x0000__x0000__x0000__x0000__x0000__x00…
282	3	modified	KE-ZHANG QIN et al.2011. SIMS zircon U-Pb geochronology and Sr-Nd isotopes of Ni-Cu-Bearing Mafic-Ultramafic Intrusions in Eastern Tianshan and Beishan in correlation with flood basalts in Tarim Basin (NW China): Constraints on a ca. 280 Ma mantle plume.A_x0000__x0000__x0000__x0000__x0000__x0000__x0000__x0000__x0000__x0000__x0000__x0000__x0000__x0000__x0000__x0000__x0000__x0000__x0000__x0000__x00…
282.7	4.1	modified	KE-ZHANG QIN et al.2011. SIMS zircon U-Pb geochronology and Sr-Nd isotopes of Ni-Cu-Bearing Mafic-Ultramafic Intrusions in Eastern Tianshan and Beishan in correlation with flood basalts in Tarim Basin (NW China): Constraints on a ca. 280 Ma mantle plume.A_x0000__x0000__x0000__x0000__x0000__x0000__x0000__x0000__x0000__x0000__x0000__x0000__x0000__x0000__x0000__x0000__x0000__x0000__x0000__x0000__x00…
282.9	2.5	modified	KE-ZHANG QIN et al.2011. SIMS zircon U-Pb geochronology and Sr-Nd isotopes of Ni-Cu-Bearing Mafic-Ultramafic Intrusions in Eastern Tianshan and Beishan in correlation with flood basalts in Tarim Basin (NW China): Constraints on a ca. 280 Ma mantle plume.A_x0000__x0000__x0000__x0000__x0000__x0000__x0000__x0000__x0000__x0000__x0000__x0000__x0000__x0000__x0000__x0000__x0000__x0000__x0000__x0000__x00…
282.9	1.6	modified	KE-ZHANG QIN et al.2011. SIMS zircon U-Pb geochronology and Sr-Nd isotopes of Ni-Cu-Bearing Mafic-Ultramafic Intrusions in Eastern Tianshan and Beishan in correlation with flood basalts in Tarim Basin (NW China): Constraints on a ca. 280 Ma mantle plume.A_x0000__x0000__x0000__x0000__x0000__x0000__x0000__x0000__x0000__x0000__x0000__x0000__x0000__x0000__x0000__x0000__x0000__x0000__x0000__x0000__x00…
283	3	modified	KE-ZHANG QIN et al.2011. SIMS zircon U-Pb geochronology and Sr-Nd isotopes of Ni-Cu-Bearing Mafic-Ultramafic Intrusions in Eastern Tianshan and Beishan in correlation with flood basalts in Tarim Basin (NW China): Constraints on a ca. 280 Ma mantle plume.A_x0000__x0000__x0000__x0000__x0000__x0000__x0000__x0000__x0000__x0000__x0000__x0000__x0000__x0000__x0000__x0000__x0000__x0000__x0000__x0000__x00…
283.8	1.1	modified	KE-ZHANG QIN et al.2011. SIMS zircon U-Pb geochronology and Sr-Nd isotopes of Ni-Cu-Bearing Mafic-Ultramafic Intrusions in Eastern Tianshan and Beishan in correlation with flood basalts in Tarim Basin (NW China): Constraints on a ca. 280 Ma mantle plume.A_x0000__x0000__x0000__x0000__x0000__x0000__x0000__x0000__x0000__x0000__x0000__x0000__x0000__x0000__x0000__x0000__x0000__x0000__x0000__x0000__x00…
284	2.3	modified	KE-ZHANG QIN et al.2011. SIMS zircon U-Pb geochronology and Sr-Nd isotopes of Ni-Cu-Bearing Mafic-Ultramafic Intrusions in Eastern Tianshan and Beishan in correlation with flood basalts in Tarim Basin (NW China): Constraints on a ca. 280 Ma mantle plume.A_x0000__x0000__x0000__x0000__x0000__x0000__x0000__x0000__x0000__x0000__x0000__x0000__x0000__x0000__x0000__x0000__x0000__x0000__x0000__x0000__x00…
284	8	modified	KE-ZHANG QIN et al.2011. SIMS zircon U-Pb geochronology and Sr-Nd isotopes of Ni-Cu-Bearing Mafic-Ultramafic Intrusions in Eastern Tianshan and Beishan in correlation with flood basalts in Tarim Basin (NW China): Constraints on a ca. 280 Ma mantle plume.A_x0000__x0000__x0000__x0000__x0000__x0000__x0000__x0000__x0000__x0000__x0000__x0000__x0000__x0000__x0000__x0000__x0000__x0000__x0000__x0000__x00…
284	9	modified	KE-ZHANG QIN et al.2011. SIMS zircon U-Pb geochronology and Sr-Nd isotopes of Ni-Cu-Bearing Mafic-Ultramafic Intrusions in Eastern Tianshan and Beishan in correlation with flood basalts in Tarim Basin (NW China): Constraints on a ca. 280 Ma mantle plume.A_x0000__x0000__x0000__x0000__x0000__x0000__x0000__x0000__x0000__x0000__x0000__x0000__x0000__x0000__x0000__x0000__x0000__x0000__x0000__x0000__x00…
284.5	2.5	modified	KE-ZHANG QIN et al.2011. SIMS zircon U-Pb geochronology and Sr-Nd isotopes of Ni-Cu-Bearing Mafic-Ultramafic Intrusions in Eastern Tianshan and Beishan in correlation with flood basalts in Tarim Basin (NW China): Constraints on a ca. 280 Ma mantle plume.A_x0000__x0000__x0000__x0000__x0000__x0000__x0000__x0000__x0000__x0000__x0000__x0000__x0000__x0000__x0000__x0000__x0000__x0000__x0000__x0000__x00…
284.8	5.7	modified	KE-ZHANG QIN et al.2011. SIMS zircon U-Pb geochronology and Sr-Nd isotopes of Ni-Cu-Bearing Mafic-Ultramafic Intrusions in Eastern Tianshan and Beishan in correlation with flood basalts in Tarim Basin (NW China): Constraints on a ca. 280 Ma mantle plume.A_x0000__x0000__x0000__x0000__x0000__x0000__x0000__x0000__x0000__x0000__x0000__x0000__x0000__x0000__x0000__x0000__x0000__x0000__x0000__x0000__x00…
285	10	modified	KE-ZHANG QIN et al.2011. SIMS zircon U-Pb geochronology and Sr-Nd isotopes of Ni-Cu-Bearing Mafic-Ultramafic Intrusions in Eastern Tianshan and Beishan in correlation with flood basalts in Tarim Basin (NW China): Constraints on a ca. 280 Ma mantle plume.A_x0000__x0000__x0000__x0000__x0000__x0000__x0000__x0000__x0000__x0000__x0000__x0000__x0000__x0000__x0000__x0000__x0000__x0000__x0000__x0000__x00…
285	1.2	modified	KE-ZHANG QIN et al.2011. SIMS zircon U-Pb geochronology and Sr-Nd isotopes of Ni-Cu-Bearing Mafic-Ultramafic Intrusions in Eastern Tianshan and Beishan in correlation with flood basalts in Tarim Basin (NW China): Constraints on a ca. 280 Ma mantle plume.A_x0000__x0000__x0000__x0000__x0000__x0000__x0000__x0000__x0000__x0000__x0000__x0000__x0000__x0000__x0000__x0000__x0000__x0000__x0000__x0000__x00…
285.4	8.5	modified	KE-ZHANG QIN et al.2011. SIMS zircon U-Pb geochronology and Sr-Nd isotopes of Ni-Cu-Bearing Mafic-Ultramafic Intrusions in Eastern Tianshan and Beishan in correlation with flood basalts in Tarim Basin (NW China): Constraints on a ca. 280 Ma mantle plume.A_x0000__x0000__x0000__x0000__x0000__x0000__x0000__x0000__x0000__x0000__x0000__x0000__x0000__x0000__x0000__x0000__x0000__x0000__x0000__x0000__x00…
286.4	2.8	modified	KE-ZHANG QIN et al.2011. SIMS zircon U-Pb geochronology and Sr-Nd isotopes of Ni-Cu-Bearing Mafic-Ultramafic Intrusions in Eastern Tianshan and Beishan in correlation with flood basalts in Tarim Basin (NW China): Constraints on a ca. 280 Ma mantle plume.A_x0000__x0000__x0000__x0000__x0000__x0000__x0000__x0000__x0000__x0000__x0000__x0000__x0000__x0000__x0000__x0000__x0000__x0000__x0000__x0000__x00…
286.6	3.3	modified	KE-ZHANG QIN et al.2011. SIMS zircon U-Pb geochronology and Sr-Nd isotopes of Ni-Cu-Bearing Mafic-Ultramafic Intrusions in Eastern Tianshan and Beishan in correlation with flood basalts in Tarim Basin (NW China): Constraints on a ca. 280 Ma mantle plume.A_x0000__x0000__x0000__x0000__x0000__x0000__x0000__x0000__x0000__x0000__x0000__x0000__x0000__x0000__x0000__x0000__x0000__x0000__x0000__x0000__x00…
287.2	5.6	modified	KE-ZHANG QIN et al.2011. SIMS zircon U-Pb geochronology and Sr-Nd isotopes of Ni-Cu-Bearing Mafic-Ultramafic Intrusions in Eastern Tianshan and Beishan in correlation with flood basalts in Tarim Basin (NW China): Constraints on a ca. 280 Ma mantle plume.A_x0000__x0000__x0000__x0000__x0000__x0000__x0000__x0000__x0000__x0000__x0000__x0000__x0000__x0000__x0000__x0000__x0000__x0000__x0000__x0000__x00…
287.6	2.8	modified	KE-ZHANG QIN et al.2011. SIMS zircon U-Pb geochronology and Sr-Nd isotopes of Ni-Cu-Bearing Mafic-Ultramafic Intrusions in Eastern Tianshan and Beishan in correlation with flood basalts in Tarim Basin (NW China): Constraints on a ca. 280 Ma mantle plume.A_x0000__x0000__x0000__x0000__x0000__x0000__x0000__x0000__x0000__x0000__x0000__x0000__x0000__x0000__x0000__x0000__x0000__x0000__x0000__x0000__x00…
288.4	4.4	modified	KE-ZHANG QIN et al.2011. SIMS zircon U-Pb geochronology and Sr-Nd isotopes of Ni-Cu-Bearing Mafic-Ultramafic Intrusions in Eastern Tianshan and Beishan in correlation with flood basalts in Tarim Basin (NW China): Constraints on a ca. 280 Ma mantle plume.A_x0000__x0000__x0000__x0000__x0000__x0000__x0000__x0000__x0000__x0000__x0000__x0000__x0000__x0000__x0000__x0000__x0000__x0000__x0000__x0000__x00…
289	6.1	modified	KE-ZHANG QIN et al.2011. SIMS zircon U-Pb geochronology and Sr-Nd isotopes of Ni-Cu-Bearing Mafic-Ultramafic Intrusions in Eastern Tianshan and Beishan in correlation with flood basalts in Tarim Basin (NW China): Constraints on a ca. 280 Ma mantle plume.A_x0000__x0000__x0000__x0000__x0000__x0000__x0000__x0000__x0000__x0000__x0000__x0000__x0000__x0000__x0000__x0000__x0000__x0000__x0000__x0000__x00…
289.6	5.6	modified	KE-ZHANG QIN et al.2011. SIMS zircon U-Pb geochronology and Sr-Nd isotopes of Ni-Cu-Bearing Mafic-Ultramafic Intrusions in Eastern Tianshan and Beishan in correlation with flood basalts in Tarim Basin (NW China): Constraints on a ca. 280 Ma mantle plume.A_x0000__x0000__x0000__x0000__x0000__x0000__x0000__x0000__x0000__x0000__x0000__x0000__x0000__x0000__x0000__x0000__x0000__x0000__x0000__x0000__x00…
290.1	3.5	modified	KE-ZHANG QIN et al.2011. SIMS zircon U-Pb geochronology and Sr-Nd isotopes of Ni-Cu-Bearing Mafic-Ultramafic Intrusions in Eastern Tianshan and Beishan in correlation with flood basalts in Tarim Basin (NW China): Constraints on a ca. 280 Ma mantle plume.A_x0000__x0000__x0000__x0000__x0000__x0000__x0000__x0000__x0000__x0000__x0000__x0000__x0000__x0000__x0000__x0000__x0000__x0000__x0000__x0000__x00…
290.1	3.5	modified	KE-ZHANG QIN et al.2011. SIMS zircon U-Pb geochronology and Sr-Nd isotopes of Ni-Cu-Bearing Mafic-Ultramafic Intrusions in Eastern Tianshan and Beishan in correlation with flood basalts in Tarim Basin (NW China): Constraints on a ca. 280 Ma mantle plume.A_x0000__x0000__x0000__x0000__x0000__x0000__x0000__x0000__x0000__x0000__x0000__x0000__x0000__x0000__x0000__x0000__x0000__x0000__x0000__x0000__x00…
290.2	3.4	modified	KE-ZHANG QIN et al.2011. SIMS zircon U-Pb geochronology and Sr-Nd isotopes of Ni-Cu-Bearing Mafic-Ultramafic Intrusions in Eastern Tianshan and Beishan in correlation with flood basalts in Tarim Basin (NW China): Constraints on a ca. 280 Ma mantle plume.A_x0000__x0000__x0000__x0000__x0000__x0000__x0000__x0000__x0000__x0000__x0000__x0000__x0000__x0000__x0000__x0000__x0000__x0000__x0000__x0000__x00…
290.5	4.2	modified	KE-ZHANG QIN et al.2011. SIMS zircon U-Pb geochronology and Sr-Nd isotopes of Ni-Cu-Bearing Mafic-Ultramafic Intrusions in Eastern Tianshan and Beishan in correlation with flood basalts in Tarim Basin (NW China): Constraints on a ca. 280 Ma mantle plume.A_x0000__x0000__x0000__x0000__x0000__x0000__x0000__x0000__x0000__x0000__x0000__x0000__x0000__x0000__x0000__x0000__x0000__x0000__x0000__x0000__x00…
291	10	modified	KE-ZHANG QIN et al.2011. SIMS zircon U-Pb geochronology and Sr-Nd isotopes of Ni-Cu-Bearing Mafic-Ultramafic Intrusions in Eastern Tianshan and Beishan in correlation with flood basalts in Tarim Basin (NW China): Constraints on a ca. 280 Ma mantle plume.A_x0000__x0000__x0000__x0000__x0000__x0000__x0000__x0000__x0000__x0000__x0000__x0000__x0000__x0000__x0000__x0000__x0000__x0000__x0000__x0000__x00…
292.4	0.5	modified	KE-ZHANG QIN et al.2011. SIMS zircon U-Pb geochronology and Sr-Nd isotopes of Ni-Cu-Bearing Mafic-Ultramafic Intrusions in Eastern Tianshan and Beishan in correlation with flood basalts in Tarim Basin (NW China): Constraints on a ca. 280 Ma mantle plume.A_x0000__x0000__x0000__x0000__x0000__x0000__x0000__x0000__x0000__x0000__x0000__x0000__x0000__x0000__x0000__x0000__x0000__x0000__x0000__x0000__x00…
300.5	3.2	modified	KE-ZHANG QIN et al.2011. SIMS zircon U-Pb geochronology and Sr-Nd isotopes of Ni-Cu-Bearing Mafic-Ultramafic Intrusions in Eastern Tianshan and Beishan in correlation with flood basalts in Tarim Basin (NW China): Constraints on a ca. 280 Ma mantle plume.A_x0000__x0000__x0000__x0000__x0000__x0000__x0000__x0000__x0000__x0000__x0000__x0000__x0000__x0000__x0000__x0000__x0000__x0000__x0000__x0000__x00…
278.6	1.8	SIMS	KE-ZHANG QIN et al.2011. SIMS zircon U-Pb geochronology and Sr-Nd isotopes of Ni-Cu-Bearing Mafic-Ultramafic Intrusions in Eastern Tianshan and Beishan in correlation with flood basalts in Tarim Basin (NW China): Constraints on a ca. 280 Ma mantle plume.American Journal of Science, Vol. 311, March, 2011, P. 237–260
279.1	2.9	SIMS	KE-ZHANG QIN et al.2011. SIMS zircon U-Pb geochronology and Sr-Nd isotopes of Ni-Cu-Bearing Mafic-Ultramafic Intrusions in Eastern Tianshan and Beishan in correlation with flood basalts in Tarim Basin (NW China): Constraints on a ca. 280 Ma mantle plume.American Journal of Science, Vol. 311, March, 2011, P. 237–260
279.2	2.3	SIMS	KE-ZHANG QIN et al.2011. SIMS zircon U-Pb geochronology and Sr-Nd isotopes of Ni-Cu-Bearing Mafic-Ultramafic Intrusions in Eastern Tianshan and Beishan in correlation with flood basalts in Tarim Basin (NW China): Constraints on a ca. 280 Ma mantle plume.American Journal of Science, Vol. 311, March, 2011, P. 237–260
279.7	4.8	SIMS	KE-ZHANG QIN et al.2011. SIMS zircon U-Pb geochronology and Sr-Nd isotopes of Ni-Cu-Bearing Mafic-Ultramafic Intrusions in Eastern Tianshan and Beishan in correlation with flood basalts in Tarim Basin (NW China): Constraints on a ca. 280 Ma mantle plume.American Journal of Science, Vol. 311, March, 2011, P. 237–260
283.8	3.4	SIMS	KE-ZHANG QIN et al.2011. SIMS zircon U-Pb geochronology and Sr-Nd isotopes of Ni-Cu-Bearing Mafic-Ultramafic Intrusions in Eastern Tianshan and Beishan in correlation with flood basalts in Tarim Basin (NW China): Constraints on a ca. 280 Ma mantle plume.American Journal of Science, Vol. 311, March, 2011, P. 237–260
284	2.2	SIMS	KE-ZHANG QIN et al.2011. SIMS zircon U-Pb geochronology and Sr-Nd isotopes of Ni-Cu-Bearing Mafic-Ultramafic Intrusions in Eastern Tianshan and Beishan in correlation with flood basalts in Tarim Basin (NW China): Constraints on a ca. 280 Ma mantle plume.American Journal of Science, Vol. 311, March, 2011, P. 237–260
47	1	SHRIMP	Li Zhao et al. 2006. SHRIMP U-Pb zircon dating and geochemistry of Kuwei intrusion in the Altay Mountains, Xinjiang. ACTA PETROLOGICA ET MINERALOGICA.25(3):194-202
226.3	4.6	SHRIMP	Lifei Zhang et al. 2007. Triassic collision of western Tianshan orogenic belt, China: Evidence from SHRIMP U–Pb dating of zircon from HP/UHP eclogitic rocks.Lithos.Volume 96, Issues 1–2, June 2007, Pages 266–280
234	6	SHRIMP	Lifei Zhang et al. 2007. Triassic collision of western Tianshan orogenic belt, China: Evidence from SHRIMP U–Pb dating of zircon from HP/UHP eclogitic rocks.Lithos.Volume 96, Issues 1–2, June 2007, Pages 266–280
310	6	SHRIMP	Lifei Zhang et al. 2007. Triassic collision of western Tianshan orogenic belt, China: Evidence from SHRIMP U–Pb dating of zircon from HP/UHP eclogitic rocks.Lithos.Volume 96, Issues 1–2, June 2007, Pages 266–280
310	5	SHRIMP	Lifei Zhang et al. 2007. Triassic collision of western Tianshan orogenic belt, China: Evidence from SHRIMP U–Pb dating of zircon from HP/UHP eclogitic rocks.Lithos.Volume 96, Issues 1–2, June 2007, Pages 266–280
269	2		Meifu Zhou et al.2004. Geochemistry and petrogenesis of 270 Ma Ni–Cu–(PGE) sulfide-bearing mafic intrusions in the Huangshan district, Eastern Xinjiang, Northwest China: implications for the tectonic evolution of the Central Asian orogenic belt.Chemical Geology.Volume 209, Issues 3–4, 27 September 2004, Pages 233–257
318	2	LA-ICP-MS	Min Sun et al.2008. Zircon U–Pb and Hf isotopic study of gneissic rocks from the Chinese Altai: Progressive accretionary history in the early to middle Palaeozoic.Chemical Geology.Volume 247, Issues 3–4, 30 January 2008, Pages 352–383.
412	5	LA-ICP-MS	Min Sun et al.2008. Zircon U–Pb and Hf isotopic study of gneissic rocks from the Chinese Altai: Progressive accretionary history in the early to middle Palaeozoic.Chemical Geology.Volume 247, Issues 3–4, 30 January 2008, Pages 352–383.
425	8	LA-ICP-MS	Min Sun et al.2008. Zircon U–Pb and Hf isotopic study of gneissic rocks from the Chinese Altai: Progressive accretionary history in the early to middle Palaeozoic.Chemical Geology.Volume 247, Issues 3–4, 30 January 2008, Pages 352–383.
453	5	LA-ICP-MS	Min Sun et al.2008. Zircon U–Pb and Hf isotopic study of gneissic rocks from the Chinese Altai: Progressive accretionary history in the early to middle Palaeozoic.Chemical Geology.Volume 247, Issues 3–4, 30 January 2008, Pages 352–383.
466	11	LA-ICP-MS	Min Sun et al.2008. Zircon U–Pb and Hf isotopic study of gneissic rocks from the Chinese Altai: Progressive accretionary history in the early to middle Palaeozoic.Chemical Geology.Volume 247, Issues 3–4, 30 January 2008, Pages 352–383.
481	11	LA-ICP-MS	Min Sun et al.2008. Zircon U–Pb and Hf isotopic study of gneissic rocks from the Chinese Altai: Progressive accretionary history in the early to middle Palaeozoic.Chemical Geology.Volume 247, Issues 3–4, 30 January 2008, Pages 352–383.
505	7	LA-ICP-MS	Min Sun et al.2008. Zircon U–Pb and Hf isotopic study of gneissic rocks from the Chinese Altai: Progressive accretionary history in the early to middle Palaeozoic.Chemical Geology.Volume 247, Issues 3–4, 30 January 2008, Pages 352–383.
517	8	LA-ICP-MS	Min Sun et al.2008. Zircon U–Pb and Hf isotopic study of gneissic rocks from the Chinese Altai: Progressive accretionary history in the early to middle Palaeozoic.Chemical Geology.Volume 247, Issues 3–4, 30 January 2008, Pages 352–383.
528	16	LA-ICP-MS	Min Sun et al.2008. Zircon U–Pb and Hf isotopic study of gneissic rocks from the Chinese Altai: Progressive accretionary history in the early to middle Palaeozoic.Chemical Geology.Volume 247, Issues 3–4, 30 January 2008, Pages 352–383.
281.2	0.9	LA-ICP-MS	Qigui Mao et al.2006. Zircon U-Pb age and the geochemistry of the Baisiquan mafic-ultramafic complex in the Eastern Tianshan,Xinjiang province:consitraints on the closure of the Paleo-Asian Ocean. Acta Petrologica Sinica.22(1):153-162
470	12	SHRIMP	Qing Qian et al.2009. Early Paleozoic tectonic evolution of the Chinese South Tianshan Orogen: constraints from SHRIMP zircon U–Pb geochronology and geochemistry of basaltic and dioritic rocks from Xiate, NW China.International Journal of Earth Sciences.April 2009, Volume 98, Issue 3, pp 551-569
516.3	7.4	SHRIMP	Qing Qian et al.2009. Early Paleozoic tectonic evolution of the Chinese South Tianshan Orogen: constraints from SHRIMP zircon U–Pb geochronology and geochemistry of basaltic and dioritic rocks from Xiate, NW China.International Journal of Earth Sciences.April 2009, Volume 98, Issue 3, pp 551-569
424.9	5.8	LA-ICP-MS	Ru-Xiong Lei et al.2011.Zircon U–Pb chronology and Hf isotope of the Xingxingxia granodiorite from the Central Tianshan zone (NW China): Implications for the tectonic evolution of the southern Altaids.Gondwana Research.Volume 20, Issues 2–3, September 2011, Pages 582–593
809	41	LA-ICP-MS	Ru-Xiong Lei et al.2011.Zircon U–Pb chronology and Hf isotope of the Xingxingxia granodiorite from the Central Tianshan zone (NW China): Implications for the tectonic evolution of the southern Altaids.Gondwana Research.Volume 20, Issues 2–3, September 2011, Pages 582–593
737.2	3.8	LA-ICP-MS	Ru-Xiong Lei et al.2013. The Neoproterozoic Hongliujing A-type granite in Central Tianshan (NW China): LA-ICP-MS zircon U–Pb geochronology, geochemistry, Nd–Hf isotope and tectonic significance.Journal of Asian Earth Sciences.Volume 74, 25 September 2013, Pages 142–154
741.7	7.1	LA-ICP-MS	Ru-Xiong Lei et al.2013. The Neoproterozoic Hongliujing A-type granite in Central Tianshan (NW China): LA-ICP-MS zircon U–Pb geochronology, geochemistry, Nd–Hf isotope and tectonic significance.Journal of Asian Earth Sciences.Volume 74, 25 September 2013, Pages 142–154
225.3	5.3	LA-ICP-MS	S. Glorie et al.2011. Formation and Palaeozoic evolution of the Gorny-Altai–Altai-Mongolia suture zone (South Siberia): Zircon U/Pb constraints on the igneous record.Gondwana Research.Volume 20, Issues 2–3, September 2011, Pages 465–484.
244.6	5.4	LA-ICP-MS	S. Glorie et al.2011. Formation and Palaeozoic evolution of the Gorny-Altai–Altai-Mongolia suture zone (South Siberia): Zircon U/Pb constraints on the igneous record.Gondwana Research.Volume 20, Issues 2–3, September 2011, Pages 465–484.
250	6.1	LA-ICP-MS	S. Glorie et al.2011. Formation and Palaeozoic evolution of the Gorny-Altai–Altai-Mongolia suture zone (South Siberia): Zircon U/Pb constraints on the igneous record.Gondwana Research.Volume 20, Issues 2–3, September 2011, Pages 465–484.
295	5.9	LA-ICP-MS	S. Glorie et al.2011. Formation and Palaeozoic evolution of the Gorny-Altai–Altai-Mongolia suture zone (South Siberia): Zircon U/Pb constraints on the igneous record.Gondwana Research.Volume 20, Issues 2–3, September 2011, Pages 465–484.
355	21	LA-ICP-MS	S. Glorie et al.2011. Formation and Palaeozoic evolution of the Gorny-Altai–Altai-Mongolia suture zone (South Siberia): Zircon U/Pb constraints on the igneous record.Gondwana Research.Volume 20, Issues 2–3, September 2011, Pages 465–484.
363	14	LA-ICP-MS	S. Glorie et al.2011. Formation and Palaeozoic evolution of the Gorny-Altai–Altai-Mongolia suture zone (South Siberia): Zircon U/Pb constraints on the igneous record.Gondwana Research.Volume 20, Issues 2–3, September 2011, Pages 465–484.
379.5	5.6	LA-ICP-MS	S. Glorie et al.2011. Formation and Palaeozoic evolution of the Gorny-Altai–Altai-Mongolia suture zone (South Siberia): Zircon U/Pb constraints on the igneous record.Gondwana Research.Volume 20, Issues 2–3, September 2011, Pages 465–484.
380.1	10	LA-ICP-MS	S. Glorie et al.2011. Formation and Palaeozoic evolution of the Gorny-Altai–Altai-Mongolia suture zone (South Siberia): Zircon U/Pb constraints on the igneous record.Gondwana Research.Volume 20, Issues 2–3, September 2011, Pages 465–484.
382.3	4.3	LA-ICP-MS	S. Glorie et al.2011. Formation and Palaeozoic evolution of the Gorny-Altai–Altai-Mongolia suture zone (South Siberia): Zircon U/Pb constraints on the igneous record.Gondwana Research.Volume 20, Issues 2–3, September 2011, Pages 465–484.
384.2	8.6	LA-ICP-MS	S. Glorie et al.2011. Formation and Palaeozoic evolution of the Gorny-Altai–Altai-Mongolia suture zone (South Siberia): Zircon U/Pb constraints on the igneous record.Gondwana Research.Volume 20, Issues 2–3, September 2011, Pages 465–484.
387	30	LA-ICP-MS	S. Glorie et al.2011. Formation and Palaeozoic evolution of the Gorny-Altai–Altai-Mongolia suture zone (South Siberia): Zircon U/Pb constraints on the igneous record.Gondwana Research.Volume 20, Issues 2–3, September 2011, Pages 465–484.
392.1	8.3	LA-ICP-MS	S. Glorie et al.2011. Formation and Palaeozoic evolution of the Gorny-Altai–Altai-Mongolia suture zone (South Siberia): Zircon U/Pb constraints on the igneous record.Gondwana Research.Volume 20, Issues 2–3, September 2011, Pages 465–484.
394.2	8.5	LA-ICP-MS	S. Glorie et al.2011. Formation and Palaeozoic evolution of the Gorny-Altai–Altai-Mongolia suture zone (South Siberia): Zircon U/Pb constraints on the igneous record.Gondwana Research.Volume 20, Issues 2–3, September 2011, Pages 465–484.
396.5	5	LA-ICP-MS	S. Glorie et al.2011. Formation and Palaeozoic evolution of the Gorny-Altai–Altai-Mongolia suture zone (South Siberia): Zircon U/Pb constraints on the igneous record.Gondwana Research.Volume 20, Issues 2–3, September 2011, Pages 465–484.
397.3	4.6	LA-ICP-MS	S. Glorie et al.2011. Formation and Palaeozoic evolution of the Gorny-Altai–Altai-Mongolia suture zone (South Siberia): Zircon U/Pb constraints on the igneous record.Gondwana Research.Volume 20, Issues 2–3, September 2011, Pages 465–484.
402.3	5.8	LA-ICP-MS	S. Glorie et al.2011. Formation and Palaeozoic evolution of the Gorny-Altai–Altai-Mongolia suture zone (South Siberia): Zircon U/Pb constraints on the igneous record.Gondwana Research.Volume 20, Issues 2–3, September 2011, Pages 465–484.
406.4	3.3	LA-ICP-MS	S. Glorie et al.2011. Formation and Palaeozoic evolution of the Gorny-Altai–Altai-Mongolia suture zone (South Siberia): Zircon U/Pb constraints on the igneous record.Gondwana Research.Volume 20, Issues 2–3, September 2011, Pages 465–484.
409.5	4	LA-ICP-MS	S. Glorie et al.2011. Formation and Palaeozoic evolution of the Gorny-Altai–Altai-Mongolia suture zone (South Siberia): Zircon U/Pb constraints on the igneous record.Gondwana Research.Volume 20, Issues 2–3, September 2011, Pages 465–484.
409.6	13	LA-ICP-MS	S. Glorie et al.2011. Formation and Palaeozoic evolution of the Gorny-Altai–Altai-Mongolia suture zone (South Siberia): Zircon U/Pb constraints on the igneous record.Gondwana Research.Volume 20, Issues 2–3, September 2011, Pages 465–484.
410	7.1	LA-ICP-MS	S. Glorie et al.2011. Formation and Palaeozoic evolution of the Gorny-Altai–Altai-Mongolia suture zone (South Siberia): Zircon U/Pb constraints on the igneous record.Gondwana Research.Volume 20, Issues 2–3, September 2011, Pages 465–484.
410.9	4.5	LA-ICP-MS	S. Glorie et al.2011. Formation and Palaeozoic evolution of the Gorny-Altai–Altai-Mongolia suture zone (South Siberia): Zircon U/Pb constraints on the igneous record.Gondwana Research.Volume 20, Issues 2–3, September 2011, Pages 465–484.
412.9	5.4	LA-ICP-MS	S. Glorie et al.2011. Formation and Palaeozoic evolution of the Gorny-Altai–Altai-Mongolia suture zone (South Siberia): Zircon U/Pb constraints on the igneous record.Gondwana Research.Volume 20, Issues 2–3, September 2011, Pages 465–484.
413.4	7.7	LA-ICP-MS	S. Glorie et al.2011. Formation and Palaeozoic evolution of the Gorny-Altai–Altai-Mongolia suture zone (South Siberia): Zircon U/Pb constraints on the igneous record.Gondwana Research.Volume 20, Issues 2–3, September 2011, Pages 465–484.
414.6	9.8	LA-ICP-MS	S. Glorie et al.2011. Formation and Palaeozoic evolution of the Gorny-Altai–Altai-Mongolia suture zone (South Siberia): Zircon U/Pb constraints on the igneous record.Gondwana Research.Volume 20, Issues 2–3, September 2011, Pages 465–484.
416.5	6.9	LA-ICP-MS	S. Glorie et al.2011. Formation and Palaeozoic evolution of the Gorny-Altai–Altai-Mongolia suture zone (South Siberia): Zircon U/Pb constraints on the igneous record.Gondwana Research.Volume 20, Issues 2–3, September 2011, Pages 465–484.
417.1	10	LA-ICP-MS	S. Glorie et al.2011. Formation and Palaeozoic evolution of the Gorny-Altai–Altai-Mongolia suture zone (South Siberia): Zircon U/Pb constraints on the igneous record.Gondwana Research.Volume 20, Issues 2–3, September 2011, Pages 465–484.
418.9	4.3	LA-ICP-MS	S. Glorie et al.2011. Formation and Palaeozoic evolution of the Gorny-Altai–Altai-Mongolia suture zone (South Siberia): Zircon U/Pb constraints on the igneous record.Gondwana Research.Volume 20, Issues 2–3, September 2011, Pages 465–484.
419.6	8.3	LA-ICP-MS	S. Glorie et al.2011. Formation and Palaeozoic evolution of the Gorny-Altai–Altai-Mongolia suture zone (South Siberia): Zircon U/Pb constraints on the igneous record.Gondwana Research.Volume 20, Issues 2–3, September 2011, Pages 465–484.
419.9	6.2	LA-ICP-MS	S. Glorie et al.2011. Formation and Palaeozoic evolution of the Gorny-Altai–Altai-Mongolia suture zone (South Siberia): Zircon U/Pb constraints on the igneous record.Gondwana Research.Volume 20, Issues 2–3, September 2011, Pages 465–484.
420.7	6.8	LA-ICP-MS	S. Glorie et al.2011. Formation and Palaeozoic evolution of the Gorny-Altai–Altai-Mongolia suture zone (South Siberia): Zircon U/Pb constraints on the igneous record.Gondwana Research.Volume 20, Issues 2–3, September 2011, Pages 465–484.
421.5	7.2	LA-ICP-MS	S. Glorie et al.2011. Formation and Palaeozoic evolution of the Gorny-Altai–Altai-Mongolia suture zone (South Siberia): Zircon U/Pb constraints on the igneous record.Gondwana Research.Volume 20, Issues 2–3, September 2011, Pages 465–484.
453	6.7	LA-ICP-MS	S. Glorie et al.2011. Formation and Palaeozoic evolution of the Gorny-Altai–Altai-Mongolia suture zone (South Siberia): Zircon U/Pb constraints on the igneous record.Gondwana Research.Volume 20, Issues 2–3, September 2011, Pages 465–484.
461.8	7.5	LA-ICP-MS	S. Glorie et al.2011. Formation and Palaeozoic evolution of the Gorny-Altai–Altai-Mongolia suture zone (South Siberia): Zircon U/Pb constraints on the igneous record.Gondwana Research.Volume 20, Issues 2–3, September 2011, Pages 465–484.
470	19	LA-ICP-MS	S. Glorie et al.2011. Formation and Palaeozoic evolution of the Gorny-Altai–Altai-Mongolia suture zone (South Siberia): Zircon U/Pb constraints on the igneous record.Gondwana Research.Volume 20, Issues 2–3, September 2011, Pages 465–484.
478	26	LA-ICP-MS	S. Glorie et al.2011. Formation and Palaeozoic evolution of the Gorny-Altai–Altai-Mongolia suture zone (South Siberia): Zircon U/Pb constraints on the igneous record.Gondwana Research.Volume 20, Issues 2–3, September 2011, Pages 465–484.
481	11	LA-ICP-MS	S. Glorie et al.2011. Formation and Palaeozoic evolution of the Gorny-Altai–Altai-Mongolia suture zone (South Siberia): Zircon U/Pb constraints on the igneous record.Gondwana Research.Volume 20, Issues 2–3, September 2011, Pages 465–484.
484	13	LA-ICP-MS	S. Glorie et al.2011. Formation and Palaeozoic evolution of the Gorny-Altai–Altai-Mongolia suture zone (South Siberia): Zircon U/Pb constraints on the igneous record.Gondwana Research.Volume 20, Issues 2–3, September 2011, Pages 465–484.
485	10	LA-ICP-MS	S. Glorie et al.2011. Formation and Palaeozoic evolution of the Gorny-Altai–Altai-Mongolia suture zone (South Siberia): Zircon U/Pb constraints on the igneous record.Gondwana Research.Volume 20, Issues 2–3, September 2011, Pages 465–484.
501	15	LA-ICP-MS	S. Glorie et al.2011. Formation and Palaeozoic evolution of the Gorny-Altai–Altai-Mongolia suture zone (South Siberia): Zircon U/Pb constraints on the igneous record.Gondwana Research.Volume 20, Issues 2–3, September 2011, Pages 465–484.
505	13	LA-ICP-MS	S. Glorie et al.2011. Formation and Palaeozoic evolution of the Gorny-Altai–Altai-Mongolia suture zone (South Siberia): Zircon U/Pb constraints on the igneous record.Gondwana Research.Volume 20, Issues 2–3, September 2011, Pages 465–484.
510.2	11	LA-ICP-MS	S. Glorie et al.2011. Formation and Palaeozoic evolution of the Gorny-Altai–Altai-Mongolia suture zone (South Siberia): Zircon U/Pb constraints on the igneous record.Gondwana Research.Volume 20, Issues 2–3, September 2011, Pages 465–484.
511	12	LA-ICP-MS	S. Glorie et al.2011. Formation and Palaeozoic evolution of the Gorny-Altai–Altai-Mongolia suture zone (South Siberia): Zircon U/Pb constraints on the igneous record.Gondwana Research.Volume 20, Issues 2–3, September 2011, Pages 465–484.
512.1	7	LA-ICP-MS	S. Glorie et al.2011. Formation and Palaeozoic evolution of the Gorny-Altai–Altai-Mongolia suture zone (South Siberia): Zircon U/Pb constraints on the igneous record.Gondwana Research.Volume 20, Issues 2–3, September 2011, Pages 465–484.
521	18	LA-ICP-MS	S. Glorie et al.2011. Formation and Palaeozoic evolution of the Gorny-Altai–Altai-Mongolia suture zone (South Siberia): Zircon U/Pb constraints on the igneous record.Gondwana Research.Volume 20, Issues 2–3, September 2011, Pages 465–484.
527.5	9.5	LA-ICP-MS	S. Glorie et al.2011. Formation and Palaeozoic evolution of the Gorny-Altai–Altai-Mongolia suture zone (South Siberia): Zircon U/Pb constraints on the igneous record.Gondwana Research.Volume 20, Issues 2–3, September 2011, Pages 465–484.
529	13	LA-ICP-MS	S. Glorie et al.2011. Formation and Palaeozoic evolution of the Gorny-Altai–Altai-Mongolia suture zone (South Siberia): Zircon U/Pb constraints on the igneous record.Gondwana Research.Volume 20, Issues 2–3, September 2011, Pages 465–484.
529	18	LA-ICP-MS	S. Glorie et al.2011. Formation and Palaeozoic evolution of the Gorny-Altai–Altai-Mongolia suture zone (South Siberia): Zircon U/Pb constraints on the igneous record.Gondwana Research.Volume 20, Issues 2–3, September 2011, Pages 465–484.
534.3	8.3	LA-ICP-MS	S. Glorie et al.2011. Formation and Palaeozoic evolution of the Gorny-Altai–Altai-Mongolia suture zone (South Siberia): Zircon U/Pb constraints on the igneous record.Gondwana Research.Volume 20, Issues 2–3, September 2011, Pages 465–484.
535	16	LA-ICP-MS	S. Glorie et al.2011. Formation and Palaeozoic evolution of the Gorny-Altai–Altai-Mongolia suture zone (South Siberia): Zircon U/Pb constraints on the igneous record.Gondwana Research.Volume 20, Issues 2–3, September 2011, Pages 465–484.
540.2	7.8	LA-ICP-MS	S. Glorie et al.2011. Formation and Palaeozoic evolution of the Gorny-Altai–Altai-Mongolia suture zone (South Siberia): Zircon U/Pb constraints on the igneous record.Gondwana Research.Volume 20, Issues 2–3, September 2011, Pages 465–484.
548	15	LA-ICP-MS	S. Glorie et al.2011. Formation and Palaeozoic evolution of the Gorny-Altai–Altai-Mongolia suture zone (South Siberia): Zircon U/Pb constraints on the igneous record.Gondwana Research.Volume 20, Issues 2–3, September 2011, Pages 465–484.
554.6	9.9	LA-ICP-MS	S. Glorie et al.2011. Formation and Palaeozoic evolution of the Gorny-Altai–Altai-Mongolia suture zone (South Siberia): Zircon U/Pb constraints on the igneous record.Gondwana Research.Volume 20, Issues 2–3, September 2011, Pages 465–484.
987	21	LA-ICP-MS	S. Glorie et al.2011. Formation and Palaeozoic evolution of the Gorny-Altai–Altai-Mongolia suture zone (South Siberia): Zircon U/Pb constraints on the igneous record.Gondwana Research.Volume 20, Issues 2–3, September 2011, Pages 465–484.
1030	170	LA-ICP-MS	S. Glorie et al.2011. Formation and Palaeozoic evolution of the Gorny-Altai–Altai-Mongolia suture zone (South Siberia): Zircon U/Pb constraints on the igneous record.Gondwana Research.Volume 20, Issues 2–3, September 2011, Pages 465–484.
1389	76	LA-ICP-MS	S. Glorie et al.2011. Formation and Palaeozoic evolution of the Gorny-Altai–Altai-Mongolia suture zone (South Siberia): Zircon U/Pb constraints on the igneous record.Gondwana Research.Volume 20, Issues 2–3, September 2011, Pages 465–484.
1530	69	LA-ICP-MS	S. Glorie et al.2011. Formation and Palaeozoic evolution of the Gorny-Altai–Altai-Mongolia suture zone (South Siberia): Zircon U/Pb constraints on the igneous record.Gondwana Research.Volume 20, Issues 2–3, September 2011, Pages 465–484.
1751	450	LA-ICP-MS	S. Glorie et al.2011. Formation and Palaeozoic evolution of the Gorny-Altai–Altai-Mongolia suture zone (South Siberia): Zircon U/Pb constraints on the igneous record.Gondwana Research.Volume 20, Issues 2–3, September 2011, Pages 465–484.
1762	80	LA-ICP-MS	S. Glorie et al.2011. Formation and Palaeozoic evolution of the Gorny-Altai–Altai-Mongolia suture zone (South Siberia): Zircon U/Pb constraints on the igneous record.Gondwana Research.Volume 20, Issues 2–3, September 2011, Pages 465–484.
1826	27	LA-ICP-MS	S. Glorie et al.2011. Formation and Palaeozoic evolution of the Gorny-Altai–Altai-Mongolia suture zone (South Siberia): Zircon U/Pb constraints on the igneous record.Gondwana Research.Volume 20, Issues 2–3, September 2011, Pages 465–484.
1866	14	LA-ICP-MS	S. Glorie et al.2011. Formation and Palaeozoic evolution of the Gorny-Altai–Altai-Mongolia suture zone (South Siberia): Zircon U/Pb constraints on the igneous record.Gondwana Research.Volume 20, Issues 2–3, September 2011, Pages 465–484.
1950	85	LA-ICP-MS	S. Glorie et al.2011. Formation and Palaeozoic evolution of the Gorny-Altai–Altai-Mongolia suture zone (South Siberia): Zircon U/Pb constraints on the igneous record.Gondwana Research.Volume 20, Issues 2–3, September 2011, Pages 465–484.
2022	31	LA-ICP-MS	S. Glorie et al.2011. Formation and Palaeozoic evolution of the Gorny-Altai–Altai-Mongolia suture zone (South Siberia): Zircon U/Pb constraints on the igneous record.Gondwana Research.Volume 20, Issues 2–3, September 2011, Pages 465–484.
431	6		Sheng-Hong Yang et al.2009. Geochemistry of the ~ 430-Ma Jingbulake mafic–ultramafic intrusion in Western Xinjiang, NW China: Implications for subduction related magmatism in the South Tianshan orogenic belt.Lithos.Volume 113, Issues 1–2, November 2009, Pages 259–273
283	13	Re-Os	Shiping Chen et al. 2005. GEOLOGICAL FEATURES AND ORE FORMATION OF THE HULU CU-NI SULFIDE DEPOSIT, EASTERN TIANSHAN, XINJIANG.Xinjiang Geology,2005,23(3):230-233.
271.9	1.55	LA-ICP-MS	Shufeng Yang et al.2013. Early Permian Tarim Large Igneous Province in northwest China.Science China Earth Sciences.December 2013, Volume 56, Issue 12, pp 2015-2026
274.1	2.4	LA-ICP-MS	Shufeng Yang et al.2013. Early Permian Tarim Large Igneous Province in northwest China.Science China Earth Sciences.December 2013, Volume 56, Issue 12, pp 2015-2026
278.5	1.4	LA-ICP-MS	Shufeng Yang et al.2013. Early Permian Tarim Large Igneous Province in northwest China.Science China Earth Sciences.December 2013, Volume 56, Issue 12, pp 2015-2026
279	4.5	LA-ICP-MS	Shufeng Yang et al.2013. Early Permian Tarim Large Igneous Province in northwest China.Science China Earth Sciences.December 2013, Volume 56, Issue 12, pp 2015-2026
282.5	4.4	LA-ICP-MS	Shufeng Yang et al.2013. Early Permian Tarim Large Igneous Province in northwest China.Science China Earth Sciences.December 2013, Volume 56, Issue 12, pp 2015-2026
282.9	1.6	LA-ICP-MS	Shufeng Yang et al.2013. Early Permian Tarim Large Igneous Province in northwest China.Science China Earth Sciences.December 2013, Volume 56, Issue 12, pp 2015-2026
286.6	3.3	LA-ICP-MS	Shufeng Yang et al.2013. Early Permian Tarim Large Igneous Province in northwest China.Science China Earth Sciences.December 2013, Volume 56, Issue 12, pp 2015-2026
288	2	LA-ICP-MS	Shufeng Yang et al.2013. Early Permian Tarim Large Igneous Province in northwest China.Science China Earth Sciences.December 2013, Volume 56, Issue 12, pp 2015-2026
288.4	4.4	LA-ICP-MS	Shufeng Yang et al.2013. Early Permian Tarim Large Igneous Province in northwest China.Science China Earth Sciences.December 2013, Volume 56, Issue 12, pp 2015-2026
288.9	2	LA-ICP-MS	Shufeng Yang et al.2013. Early Permian Tarim Large Igneous Province in northwest China.Science China Earth Sciences.December 2013, Volume 56, Issue 12, pp 2015-2026
289	6.1	LA-ICP-MS	Shufeng Yang et al.2013. Early Permian Tarim Large Igneous Province in northwest China.Science China Earth Sciences.December 2013, Volume 56, Issue 12, pp 2015-2026
289.5	2	LA-ICP-MS	Shufeng Yang et al.2013. Early Permian Tarim Large Igneous Province in northwest China.Science China Earth Sciences.December 2013, Volume 56, Issue 12, pp 2015-2026
289.5	2	LA-ICP-MS	Shufeng Yang et al.2013. Early Permian Tarim Large Igneous Province in northwest China.Science China Earth Sciences.December 2013, Volume 56, Issue 12, pp 2015-2026
289.6	5.6	LA-ICP-MS	Shufeng Yang et al.2013. Early Permian Tarim Large Igneous Province in northwest China.Science China Earth Sciences.December 2013, Volume 56, Issue 12, pp 2015-2026
290.1	3.5	LA-ICP-MS	Shufeng Yang et al.2013. Early Permian Tarim Large Igneous Province in northwest China.Science China Earth Sciences.December 2013, Volume 56, Issue 12, pp 2015-2026
290.9	4.1	LA-ICP-MS	Shufeng Yang et al.2013. Early Permian Tarim Large Igneous Province in northwest China.Science China Earth Sciences.December 2013, Volume 56, Issue 12, pp 2015-2026
291.1	4.4	LA-ICP-MS	Shufeng Yang et al.2013. Early Permian Tarim Large Igneous Province in northwest China.Science China Earth Sciences.December 2013, Volume 56, Issue 12, pp 2015-2026
291.9	2.2	LA-ICP-MS	Shufeng Yang et al.2013. Early Permian Tarim Large Igneous Province in northwest China.Science China Earth Sciences.December 2013, Volume 56, Issue 12, pp 2015-2026
292.4	0.5	LA-ICP-MS	Shufeng Yang et al.2013. Early Permian Tarim Large Igneous Province in northwest China.Science China Earth Sciences.December 2013, Volume 56, Issue 12, pp 2015-2026
293.9	4.6	LA-ICP-MS	Shufeng Yang et al.2013. Early Permian Tarim Large Igneous Province in northwest China.Science China Earth Sciences.December 2013, Volume 56, Issue 12, pp 2015-2026
265	1	Re-Os	Sun H (2009) Ore-forming mechanism in conduit system and ore-bearing property evaluation for mafic-ultramafic complex in Eastern Tianshan, Xinjiang. Unpublished PhD thesis, Institute of Geology and Geophysics, Chinese Academy of Sciences, Beijing, pp 1–274 (in Chinese with English abstract)
276	9	SHRIMP U-Pb ages	Tao Wang et al.2005. Zircon U-Pb SHRIMP age and origin of post-orogenic Lamazhao granitic pluton from Altai orogen: its implications for vertical continental growth.ACTA PETROLOGICA SINICA.21(3):640-650
407.8	5.3	SHRIMP	Tiannan Yang, et al．2006．Earlier Devonian active continental 8rc in Central Tianshan：evidence of geochemical analyses and Zircon SHRIMP dating on mylonitized granitic rock．Acta PeWologlca Sinica。22(1)：41一48.
416.6	5.6	SHRIMP	Tiannan Yang, et al．2006．Earlier Devonian active continental 8rc in Central Tianshan：evidence of geochemical analyses and Zircon SHRIMP dating on mylonitized granitic rock．Acta PeWologlca Sinica。22(1)：41一48.
401.2	3	TIMS	Wei Liu et al. 2010. Age of the Early Devonian Kangbutiebao Formation along the southern Altay Mountains and its northeastern extension.ACTA PETROLOGICA SINICA.26(2):387-400.
401.9	2.7	TIMS	Wei Liu et al. 2010. Age of the Early Devonian Kangbutiebao Formation along the southern Altay Mountains and its northeastern extension.ACTA PETROLOGICA SINICA.26(2):387-400.
363.2	5.7	SHRIMP	Wei Zhai, et al. 2006. SHRIMP dating of zircons from volcanic host rocks of Dahalajunshan Formation in Axi gold deposit, Xinjiang, China, and its geological implications. ACTA PETROLOGICA SINICA. 22(5):1399-1404.
318.7	3.3	SIMS	Wen Su et al.2010. U-Pb zircon geochronology of Tianshan eclogites in NW China: implication for the collision between the Yili and Tarim blocks of the southwestern Altaids.European Journal of Mineralogy Volume 22 Number 4 (2010), p. 473 - 478
319.5	2.9	SIMS	Wen Su et al.2010. U-Pb zircon geochronology of Tianshan eclogites in NW China: implication for the collision between the Yili and Tarim blocks of the southwestern Altaids.European Journal of Mineralogy Volume 22 Number 4 (2010), p. 473 - 478
428	6	SIMS	Wen Su et al.2010. U-Pb zircon geochronology of Tianshan eclogites in NW China: implication for the collision between the Yili and Tarim blocks of the southwestern Altaids.European Journal of Mineralogy Volume 22 Number 4 (2010), p. 473 - 478
486	8	SIMS	Wen Su et al.2010. U-Pb zircon geochronology of Tianshan eclogites in NW China: implication for the collision between the Yili and Tarim blocks of the southwestern Altaids.European Journal of Mineralogy Volume 22 Number 4 (2010), p. 473 - 478
440.9	3.1		Wuping Li et al. 2001. The U-Pb Age of Zircon from Late Caledonian Granitoids in Hongliuhe Area,East Tianshan Mountains,Northwest China and Its Geological Implications.ACTA GEOSCIENTIA SINICA.22(3)
441.4	1.6		Wuping Li et al. 2001. The U-Pb Age of Zircon from Late Caledonian Granitoids in Hongliuhe Area,East Tianshan Mountains,Northwest China and Its Geological Implications.ACTA GEOSCIENTIA SINICA.22(3)
344.4	1.9	LA-ICP-MS	Xijie Chen et al.2013. Island arc-type bimodal magmatism in the eastern Tianshan Belt, Northwest China: Geochemistry, zircon U–Pb geochronology and implications for the Paleozoic crustal evolution in Central Asia.Lithos.Volumes 168–169, May 2013, Pages 48–66
345	2.5	LA-ICP-MS	Xijie Chen et al.2013. Island arc-type bimodal magmatism in the eastern Tianshan Belt, Northwest China: Geochemistry, zircon U–Pb geochronology and implications for the Paleozoic crustal evolution in Central Asia.Lithos.Volumes 168–169, May 2013, Pages 48–66
347.1	3.9	LA-ICP-MS	Xijie Chen et al.2013. Island arc-type bimodal magmatism in the eastern Tianshan Belt, Northwest China: Geochemistry, zircon U–Pb geochronology and implications for the Paleozoic crustal evolution in Central Asia.Lithos.Volumes 168–169, May 2013, Pages 48–66
320.4	3.7	SHRIMP	Xin Yang et al.2013. Petrology and U–Pb zircon dating of coesite-bearing metapelite from the Kebuerte Valley, western Tianshan, China.Journal of Asian Earth Sciences 70–71 (2013) 295–307
320.4	3.7	SHRIMP	Xin Yang et al.2013. Petrology and U–Pb zircon dating of coesite-bearing metapelite from the Kebuerte Valley, western Tianshan, China.Journal of Asian Earth Sciences 70–71 (2013) 295–307
349.7	0.7	TIMS	XU Xue-yi et al.2006.TIMS U-Pb Isotopic Dating and Geochemical Characteristics of Paleozoic Granitic Rocks from the Middle-Western Section of Tianshan.NORTHWESTERN GEOLOGY.39(1):50-75
395.1	0.9	TIMS	XU Xue-yi et al.2006.TIMS U-Pb Isotopic Dating and Geochemical Characteristics of Paleozoic Granitic Rocks from the Middle-Western Section of Tianshan.NORTHWESTERN GEOLOGY.39(1):50-75
344	3.4		Xueyi Xu et al. 2006. LA-ICPMS Zircon U-Pb Dating of Gabbro from the Bayingou Ophiolite in the Northern Tianshan Mountains.ACTA GEOLOGICA SINICA.80(8):1168-1176.
324	7.1	SHRIMP	Xueyi Xu et al.2005. SHRIMP Dating of Plagiogranite from Bayingou Ophiolite in the Northern Tianshan Mountains.GEOLOGICAL REVIEW.51(5)
307	5	LA-ICP-MS	Yan Xiao ET AL.2011. Late Paleozoic magmatic record of East Junggar, NW China and its significance: Implication from zircon U–Pb dating and Hf isotope.Gondwana Research.Volume 20, Issues 2–3, September 2011, Pages 532–542
312	1	LA-ICP-MS	Yan Xiao ET AL.2011. Late Paleozoic magmatic record of East Junggar, NW China and its significance: Implication from zircon U–Pb dating and Hf isotope.Gondwana Research.Volume 20, Issues 2–3, September 2011, Pages 532–542
312	4	LA-ICP-MS	Yan Xiao ET AL.2011. Late Paleozoic magmatic record of East Junggar, NW China and its significance: Implication from zircon U–Pb dating and Hf isotope.Gondwana Research.Volume 20, Issues 2–3, September 2011, Pages 532–542
315	4	LA-ICP-MS	Yan Xiao ET AL.2011. Late Paleozoic magmatic record of East Junggar, NW China and its significance: Implication from zircon U–Pb dating and Hf isotope.Gondwana Research.Volume 20, Issues 2–3, September 2011, Pages 532–542
323	5	LA-ICP-MS	Yan Xiao ET AL.2011. Late Paleozoic magmatic record of East Junggar, NW China and its significance: Implication from zircon U–Pb dating and Hf isotope.Gondwana Research.Volume 20, Issues 2–3, September 2011, Pages 532–542
332	9	LA-ICP-MS	Yan Xiao ET AL.2011. Late Paleozoic magmatic record of East Junggar, NW China and its significance: Implication from zircon U–Pb dating and Hf isotope.Gondwana Research.Volume 20, Issues 2–3, September 2011, Pages 532–542
336	4	LA-ICP-MS	Yan Xiao ET AL.2011. Late Paleozoic magmatic record of East Junggar, NW China and its significance: Implication from zircon U–Pb dating and Hf isotope.Gondwana Research.Volume 20, Issues 2–3, September 2011, Pages 532–542
380	1	LA-ICP-MS	Yan Xiao ET AL.2011. Late Paleozoic magmatic record of East Junggar, NW China and its significance: Implication from zircon U–Pb dating and Hf isotope.Gondwana Research.Volume 20, Issues 2–3, September 2011, Pages 532–542
400	5	LA-ICP-MS	Yan Xiao ET AL.2011. Late Paleozoic magmatic record of East Junggar, NW China and its significance: Implication from zircon U–Pb dating and Hf isotope.Gondwana Research.Volume 20, Issues 2–3, September 2011, Pages 532–542
400	1	LA-ICP-MS	Yan Xiao ET AL.2011. Late Paleozoic magmatic record of East Junggar, NW China and its significance: Implication from zircon U–Pb dating and Hf isotope.Gondwana Research.Volume 20, Issues 2–3, September 2011, Pages 532–542
353.9	6.5	LA-ICP-MS	Yanjiao Ru et al.2012. LA-ICP-MS zircon U-Pb age and tectonic background of the Dahalajunshan Formation volcanic rocks in Wusunshan area,West Tiansan Mountains. Geological Bulletin of China,2012,31(1):50-62.
356.3	4.4	LA-ICP-MS	Yanjiao Ru et al.2012. LA-ICP-MS zircon U-Pb age and tectonic background of the Dahalajunshan Formation volcanic rocks in Wusunshan area,West Tiansan Mountains. Geological Bulletin of China,2012,31(1):50-62.
798	1		Yibin Chen et al. 1999. Zircon U-Pb age and Nd-Sr isotopic composition of granitic gneiss and its geological implications from Precambrian window of western Tianshan, NW China.GEOCHIMICA.28(6):515-520
362.1	4.3	LA-ICP-MS	Yibin Chen et al. 2012. Zircons LA-ICP-MS-U-Pb Dating on the Baluntai Deformed Granitoids, Central Tianshan Block, Northwest China,and Its Tectonic Implications.Geological Review.58(1):117-125
389.5	3.2	LA-ICP-MS	Yibin Chen et al. 2012. Zircons LA-ICP-MS-U-Pb Dating on the Baluntai Deformed Granitoids, Central Tianshan Block, Northwest China,and Its Tectonic Implications.Geological Review.58(1):117-125
440.9	3.3	LA-ICP-MS	Yibin Chen et al. 2012. Zircons LA-ICP-MS-U-Pb Dating on the Baluntai Deformed Granitoids, Central Tianshan Block, Northwest China,and Its Tectonic Implications.Geological Review.58(1):117-125
630	5	LA-ICP-MS	Yibin Chen et al. 2012. Zircons LA-ICP-MS-U-Pb Dating on the Baluntai Deformed Granitoids, Central Tianshan Block, Northwest China,and Its Tectonic Implications.Geological Review.58(1):117-125
403	5	LA-ICP-MS	Ying Tong et al. 2005. Zircon U-Pb Age of Syn-orogenic Tielieke Pluton in the Western Part of Altay Orogenic Belt and Its Structural Implications.ACTA GEOSCIENTICA SINICA.26(z1):74-77
275	2	TIMS	Ying Tong et al.2006.Tims U-Pb zircon ages of Fuyun post-orogenic linear granite plutons on the southern margin of Altay orogenic belt and their implations.ACTA PETROLOGICA ET MINERALOGICA.25(2): 85-89
281	5	TIMS	Ying Tong et al.2006.Tims U-Pb zircon ages of Fuyun post-orogenic linear granite plutons on the southern margin of Altay orogenic belt and their implations.ACTA PETROLOGICA ET MINERALOGICA.25(2): 85-89
256	4	modified	Ying Tong et al.2012.Recognition of early Carboniferous alkaline granite in the southern Altai orogen: post-orogenic processes constrained by U–Pb zircon ages, Nd isotopes, and geochemical data.International Journal of Earth Sciences.June 2012, Volume 101, Issue 4, pp 937-950
273	6	modified	Ying Tong et al.2012.Recognition of early Carboniferous alkaline granite in the southern Altai orogen: post-orogenic processes constrained by U–Pb zircon ages, Nd isotopes, and geochemical data.International Journal of Earth Sciences.June 2012, Volume 101, Issue 4, pp 937-950
275	2	modified	Ying Tong et al.2012.Recognition of early Carboniferous alkaline granite in the southern Altai orogen: post-orogenic processes constrained by U–Pb zircon ages, Nd isotopes, and geochemical data.International Journal of Earth Sciences.June 2012, Volume 101, Issue 4, pp 937-950
275	2	modified	Ying Tong et al.2012.Recognition of early Carboniferous alkaline granite in the southern Altai orogen: post-orogenic processes constrained by U–Pb zircon ages, Nd isotopes, and geochemical data.International Journal of Earth Sciences.June 2012, Volume 101, Issue 4, pp 937-950
276	9	modified	Ying Tong et al.2012.Recognition of early Carboniferous alkaline granite in the southern Altai orogen: post-orogenic processes constrained by U–Pb zircon ages, Nd isotopes, and geochemical data.International Journal of Earth Sciences.June 2012, Volume 101, Issue 4, pp 937-950
276	5	modified	Ying Tong et al.2012.Recognition of early Carboniferous alkaline granite in the southern Altai orogen: post-orogenic processes constrained by U–Pb zircon ages, Nd isotopes, and geochemical data.International Journal of Earth Sciences.June 2012, Volume 101, Issue 4, pp 937-950
277	6	modified	Ying Tong et al.2012.Recognition of early Carboniferous alkaline granite in the southern Altai orogen: post-orogenic processes constrained by U–Pb zircon ages, Nd isotopes, and geochemical data.International Journal of Earth Sciences.June 2012, Volume 101, Issue 4, pp 937-950
279	4	modified	Ying Tong et al.2012.Recognition of early Carboniferous alkaline granite in the southern Altai orogen: post-orogenic processes constrained by U–Pb zircon ages, Nd isotopes, and geochemical data.International Journal of Earth Sciences.June 2012, Volume 101, Issue 4, pp 937-950
281	4	modified	Ying Tong et al.2012.Recognition of early Carboniferous alkaline granite in the southern Altai orogen: post-orogenic processes constrained by U–Pb zircon ages, Nd isotopes, and geochemical data.International Journal of Earth Sciences.June 2012, Volume 101, Issue 4, pp 937-950
281	5	modified	Ying Tong et al.2012.Recognition of early Carboniferous alkaline granite in the southern Altai orogen: post-orogenic processes constrained by U–Pb zircon ages, Nd isotopes, and geochemical data.International Journal of Earth Sciences.June 2012, Volume 101, Issue 4, pp 937-950
281	10	modified	Ying Tong et al.2012.Recognition of early Carboniferous alkaline granite in the southern Altai orogen: post-orogenic processes constrained by U–Pb zircon ages, Nd isotopes, and geochemical data.International Journal of Earth Sciences.June 2012, Volume 101, Issue 4, pp 937-950
281	10	modified	Ying Tong et al.2012.Recognition of early Carboniferous alkaline granite in the southern Altai orogen: post-orogenic processes constrained by U–Pb zircon ages, Nd isotopes, and geochemical data.International Journal of Earth Sciences.June 2012, Volume 101, Issue 4, pp 937-950
283	4	modified	Ying Tong et al.2012.Recognition of early Carboniferous alkaline granite in the southern Altai orogen: post-orogenic processes constrained by U–Pb zircon ages, Nd isotopes, and geochemical data.International Journal of Earth Sciences.June 2012, Volume 101, Issue 4, pp 937-950
286	1	modified	Ying Tong et al.2012.Recognition of early Carboniferous alkaline granite in the southern Altai orogen: post-orogenic processes constrained by U–Pb zircon ages, Nd isotopes, and geochemical data.International Journal of Earth Sciences.June 2012, Volume 101, Issue 4, pp 937-950
299	9	modified	Ying Tong et al.2012.Recognition of early Carboniferous alkaline granite in the southern Altai orogen: post-orogenic processes constrained by U–Pb zircon ages, Nd isotopes, and geochemical data.International Journal of Earth Sciences.June 2012, Volume 101, Issue 4, pp 937-950
300	6	modified	Ying Tong et al.2012.Recognition of early Carboniferous alkaline granite in the southern Altai orogen: post-orogenic processes constrained by U–Pb zircon ages, Nd isotopes, and geochemical data.International Journal of Earth Sciences.June 2012, Volume 101, Issue 4, pp 937-950
318	6	modified	Ying Tong et al.2012.Recognition of early Carboniferous alkaline granite in the southern Altai orogen: post-orogenic processes constrained by U–Pb zircon ages, Nd isotopes, and geochemical data.International Journal of Earth Sciences.June 2012, Volume 101, Issue 4, pp 937-950
319	6	modified	Ying Tong et al.2012.Recognition of early Carboniferous alkaline granite in the southern Altai orogen: post-orogenic processes constrained by U–Pb zircon ages, Nd isotopes, and geochemical data.International Journal of Earth Sciences.June 2012, Volume 101, Issue 4, pp 937-950
319	6	modified	Ying Tong et al.2012.Recognition of early Carboniferous alkaline granite in the southern Altai orogen: post-orogenic processes constrained by U–Pb zircon ages, Nd isotopes, and geochemical data.International Journal of Earth Sciences.June 2012, Volume 101, Issue 4, pp 937-950
320	2	modified	Ying Tong et al.2012.Recognition of early Carboniferous alkaline granite in the southern Altai orogen: post-orogenic processes constrained by U–Pb zircon ages, Nd isotopes, and geochemical data.International Journal of Earth Sciences.June 2012, Volume 101, Issue 4, pp 937-950
343	3	modified	Ying Tong et al.2012.Recognition of early Carboniferous alkaline granite in the southern Altai orogen: post-orogenic processes constrained by U–Pb zircon ages, Nd isotopes, and geochemical data.International Journal of Earth Sciences.June 2012, Volume 101, Issue 4, pp 937-950
354	4	LA-ICP-MS	Ying Tong et al.2012.Recognition of early Carboniferous alkaline granite in the southern Altai orogen: post-orogenic processes constrained by U–Pb zircon ages, Nd isotopes, and geochemical data.International Journal of Earth Sciences.June 2012, Volume 101, Issue 4, pp 937-950
355	7	modified	Ying Tong et al.2012.Recognition of early Carboniferous alkaline granite in the southern Altai orogen: post-orogenic processes constrained by U–Pb zircon ages, Nd isotopes, and geochemical data.International Journal of Earth Sciences.June 2012, Volume 101, Issue 4, pp 937-950
358	4	LA-ICP-MS	Ying Tong et al.2012.Recognition of early Carboniferous alkaline granite in the southern Altai orogen: post-orogenic processes constrained by U–Pb zircon ages, Nd isotopes, and geochemical data.International Journal of Earth Sciences.June 2012, Volume 101, Issue 4, pp 937-950
358	4	modified	Ying Tong et al.2012.Recognition of early Carboniferous alkaline granite in the southern Altai orogen: post-orogenic processes constrained by U–Pb zircon ages, Nd isotopes, and geochemical data.International Journal of Earth Sciences.June 2012, Volume 101, Issue 4, pp 937-950
359	5	modified	Ying Tong et al.2012.Recognition of early Carboniferous alkaline granite in the southern Altai orogen: post-orogenic processes constrained by U–Pb zircon ages, Nd isotopes, and geochemical data.International Journal of Earth Sciences.June 2012, Volume 101, Issue 4, pp 937-950
364.5	10	modified	Ying Tong et al.2012.Recognition of early Carboniferous alkaline granite in the southern Altai orogen: post-orogenic processes constrained by U–Pb zircon ages, Nd isotopes, and geochemical data.International Journal of Earth Sciences.June 2012, Volume 101, Issue 4, pp 937-950
367.2	9.3	modified	Ying Tong et al.2012.Recognition of early Carboniferous alkaline granite in the southern Altai orogen: post-orogenic processes constrained by U–Pb zircon ages, Nd isotopes, and geochemical data.International Journal of Earth Sciences.June 2012, Volume 101, Issue 4, pp 937-950
370	19	modified	Ying Tong et al.2012.Recognition of early Carboniferous alkaline granite in the southern Altai orogen: post-orogenic processes constrained by U–Pb zircon ages, Nd isotopes, and geochemical data.International Journal of Earth Sciences.June 2012, Volume 101, Issue 4, pp 937-950
371	1	modified	Ying Tong et al.2012.Recognition of early Carboniferous alkaline granite in the southern Altai orogen: post-orogenic processes constrained by U–Pb zircon ages, Nd isotopes, and geochemical data.International Journal of Earth Sciences.June 2012, Volume 101, Issue 4, pp 937-950
372	19	modified	Ying Tong et al.2012.Recognition of early Carboniferous alkaline granite in the southern Altai orogen: post-orogenic processes constrained by U–Pb zircon ages, Nd isotopes, and geochemical data.International Journal of Earth Sciences.June 2012, Volume 101, Issue 4, pp 937-950
373	8.3	modified	Ying Tong et al.2012.Recognition of early Carboniferous alkaline granite in the southern Altai orogen: post-orogenic processes constrained by U–Pb zircon ages, Nd isotopes, and geochemical data.International Journal of Earth Sciences.June 2012, Volume 101, Issue 4, pp 937-950
375.4	9.9	modified	Ying Tong et al.2012.Recognition of early Carboniferous alkaline granite in the southern Altai orogen: post-orogenic processes constrained by U–Pb zircon ages, Nd isotopes, and geochemical data.International Journal of Earth Sciences.June 2012, Volume 101, Issue 4, pp 937-950
375.8	14	modified	Ying Tong et al.2012.Recognition of early Carboniferous alkaline granite in the southern Altai orogen: post-orogenic processes constrained by U–Pb zircon ages, Nd isotopes, and geochemical data.International Journal of Earth Sciences.June 2012, Volume 101, Issue 4, pp 937-950
377.6	6.2	modified	Ying Tong et al.2012.Recognition of early Carboniferous alkaline granite in the southern Altai orogen: post-orogenic processes constrained by U–Pb zircon ages, Nd isotopes, and geochemical data.International Journal of Earth Sciences.June 2012, Volume 101, Issue 4, pp 937-950
377.7	6.9	modified	Ying Tong et al.2012.Recognition of early Carboniferous alkaline granite in the southern Altai orogen: post-orogenic processes constrained by U–Pb zircon ages, Nd isotopes, and geochemical data.International Journal of Earth Sciences.June 2012, Volume 101, Issue 4, pp 937-950
378	6	modified	Ying Tong et al.2012.Recognition of early Carboniferous alkaline granite in the southern Altai orogen: post-orogenic processes constrained by U–Pb zircon ages, Nd isotopes, and geochemical data.International Journal of Earth Sciences.June 2012, Volume 101, Issue 4, pp 937-950
378.6	5.7	modified	Ying Tong et al.2012.Recognition of early Carboniferous alkaline granite in the southern Altai orogen: post-orogenic processes constrained by U–Pb zircon ages, Nd isotopes, and geochemical data.International Journal of Earth Sciences.June 2012, Volume 101, Issue 4, pp 937-950
379.1	5.5	modified	Ying Tong et al.2012.Recognition of early Carboniferous alkaline granite in the southern Altai orogen: post-orogenic processes constrained by U–Pb zircon ages, Nd isotopes, and geochemical data.International Journal of Earth Sciences.June 2012, Volume 101, Issue 4, pp 937-950
379.4	4.4	modified	Ying Tong et al.2012.Recognition of early Carboniferous alkaline granite in the southern Altai orogen: post-orogenic processes constrained by U–Pb zircon ages, Nd isotopes, and geochemical data.International Journal of Earth Sciences.June 2012, Volume 101, Issue 4, pp 937-950
381	6	modified	Ying Tong et al.2012.Recognition of early Carboniferous alkaline granite in the southern Altai orogen: post-orogenic processes constrained by U–Pb zircon ages, Nd isotopes, and geochemical data.International Journal of Earth Sciences.June 2012, Volume 101, Issue 4, pp 937-950
381	4	modified	Ying Tong et al.2012.Recognition of early Carboniferous alkaline granite in the southern Altai orogen: post-orogenic processes constrained by U–Pb zircon ages, Nd isotopes, and geochemical data.International Journal of Earth Sciences.June 2012, Volume 101, Issue 4, pp 937-950
382	5	modified	Ying Tong et al.2012.Recognition of early Carboniferous alkaline granite in the southern Altai orogen: post-orogenic processes constrained by U–Pb zircon ages, Nd isotopes, and geochemical data.International Journal of Earth Sciences.June 2012, Volume 101, Issue 4, pp 937-950
389	1	modified	Ying Tong et al.2012.Recognition of early Carboniferous alkaline granite in the southern Altai orogen: post-orogenic processes constrained by U–Pb zircon ages, Nd isotopes, and geochemical data.International Journal of Earth Sciences.June 2012, Volume 101, Issue 4, pp 937-950
398	5	modified	Ying Tong et al.2012.Recognition of early Carboniferous alkaline granite in the southern Altai orogen: post-orogenic processes constrained by U–Pb zircon ages, Nd isotopes, and geochemical data.International Journal of Earth Sciences.June 2012, Volume 101, Issue 4, pp 937-950
398	9	modified	Ying Tong et al.2012.Recognition of early Carboniferous alkaline granite in the southern Altai orogen: post-orogenic processes constrained by U–Pb zircon ages, Nd isotopes, and geochemical data.International Journal of Earth Sciences.June 2012, Volume 101, Issue 4, pp 937-950
399	4	modified	Ying Tong et al.2012.Recognition of early Carboniferous alkaline granite in the southern Altai orogen: post-orogenic processes constrained by U–Pb zircon ages, Nd isotopes, and geochemical data.International Journal of Earth Sciences.June 2012, Volume 101, Issue 4, pp 937-950
399	2	modified	Ying Tong et al.2012.Recognition of early Carboniferous alkaline granite in the southern Altai orogen: post-orogenic processes constrained by U–Pb zircon ages, Nd isotopes, and geochemical data.International Journal of Earth Sciences.June 2012, Volume 101, Issue 4, pp 937-950
400	6	modified	Ying Tong et al.2012.Recognition of early Carboniferous alkaline granite in the southern Altai orogen: post-orogenic processes constrained by U–Pb zircon ages, Nd isotopes, and geochemical data.International Journal of Earth Sciences.June 2012, Volume 101, Issue 4, pp 937-950
400	6	modified	Ying Tong et al.2012.Recognition of early Carboniferous alkaline granite in the southern Altai orogen: post-orogenic processes constrained by U–Pb zircon ages, Nd isotopes, and geochemical data.International Journal of Earth Sciences.June 2012, Volume 101, Issue 4, pp 937-950
400	6	modified	Ying Tong et al.2012.Recognition of early Carboniferous alkaline granite in the southern Altai orogen: post-orogenic processes constrained by U–Pb zircon ages, Nd isotopes, and geochemical data.International Journal of Earth Sciences.June 2012, Volume 101, Issue 4, pp 937-950
403	3	modified	Ying Tong et al.2012.Recognition of early Carboniferous alkaline granite in the southern Altai orogen: post-orogenic processes constrained by U–Pb zircon ages, Nd isotopes, and geochemical data.International Journal of Earth Sciences.June 2012, Volume 101, Issue 4, pp 937-950
404	9	modified	Ying Tong et al.2012.Recognition of early Carboniferous alkaline granite in the southern Altai orogen: post-orogenic processes constrained by U–Pb zircon ages, Nd isotopes, and geochemical data.International Journal of Earth Sciences.June 2012, Volume 101, Issue 4, pp 937-950
404	8	modified	Ying Tong et al.2012.Recognition of early Carboniferous alkaline granite in the southern Altai orogen: post-orogenic processes constrained by U–Pb zircon ages, Nd isotopes, and geochemical data.International Journal of Earth Sciences.June 2012, Volume 101, Issue 4, pp 937-950
406	5	modified	Ying Tong et al.2012.Recognition of early Carboniferous alkaline granite in the southern Altai orogen: post-orogenic processes constrained by U–Pb zircon ages, Nd isotopes, and geochemical data.International Journal of Earth Sciences.June 2012, Volume 101, Issue 4, pp 937-950
408	7	modified	Ying Tong et al.2012.Recognition of early Carboniferous alkaline granite in the southern Altai orogen: post-orogenic processes constrained by U–Pb zircon ages, Nd isotopes, and geochemical data.International Journal of Earth Sciences.June 2012, Volume 101, Issue 4, pp 937-950
409	7	modified	Ying Tong et al.2012.Recognition of early Carboniferous alkaline granite in the southern Altai orogen: post-orogenic processes constrained by U–Pb zircon ages, Nd isotopes, and geochemical data.International Journal of Earth Sciences.June 2012, Volume 101, Issue 4, pp 937-950
411	1	modified	Ying Tong et al.2012.Recognition of early Carboniferous alkaline granite in the southern Altai orogen: post-orogenic processes constrained by U–Pb zircon ages, Nd isotopes, and geochemical data.International Journal of Earth Sciences.June 2012, Volume 101, Issue 4, pp 937-950
412	12	modified	Ying Tong et al.2012.Recognition of early Carboniferous alkaline granite in the southern Altai orogen: post-orogenic processes constrained by U–Pb zircon ages, Nd isotopes, and geochemical data.International Journal of Earth Sciences.June 2012, Volume 101, Issue 4, pp 937-950
412	5	modified	Ying Tong et al.2012.Recognition of early Carboniferous alkaline granite in the southern Altai orogen: post-orogenic processes constrained by U–Pb zircon ages, Nd isotopes, and geochemical data.International Journal of Earth Sciences.June 2012, Volume 101, Issue 4, pp 937-950
412	6	modified	Ying Tong et al.2012.Recognition of early Carboniferous alkaline granite in the southern Altai orogen: post-orogenic processes constrained by U–Pb zircon ages, Nd isotopes, and geochemical data.International Journal of Earth Sciences.June 2012, Volume 101, Issue 4, pp 937-950
415	5	modified	Ying Tong et al.2012.Recognition of early Carboniferous alkaline granite in the southern Altai orogen: post-orogenic processes constrained by U–Pb zircon ages, Nd isotopes, and geochemical data.International Journal of Earth Sciences.June 2012, Volume 101, Issue 4, pp 937-950
416	9	modified	Ying Tong et al.2012.Recognition of early Carboniferous alkaline granite in the southern Altai orogen: post-orogenic processes constrained by U–Pb zircon ages, Nd isotopes, and geochemical data.International Journal of Earth Sciences.June 2012, Volume 101, Issue 4, pp 937-950
416	5	modified	Ying Tong et al.2012.Recognition of early Carboniferous alkaline granite in the southern Altai orogen: post-orogenic processes constrained by U–Pb zircon ages, Nd isotopes, and geochemical data.International Journal of Earth Sciences.June 2012, Volume 101, Issue 4, pp 937-950
416.6	9.8	modified	Ying Tong et al.2012.Recognition of early Carboniferous alkaline granite in the southern Altai orogen: post-orogenic processes constrained by U–Pb zircon ages, Nd isotopes, and geochemical data.International Journal of Earth Sciences.June 2012, Volume 101, Issue 4, pp 937-950
420	5	modified	Ying Tong et al.2012.Recognition of early Carboniferous alkaline granite in the southern Altai orogen: post-orogenic processes constrained by U–Pb zircon ages, Nd isotopes, and geochemical data.International Journal of Earth Sciences.June 2012, Volume 101, Issue 4, pp 937-950
425	8	modified	Ying Tong et al.2012.Recognition of early Carboniferous alkaline granite in the southern Altai orogen: post-orogenic processes constrained by U–Pb zircon ages, Nd isotopes, and geochemical data.International Journal of Earth Sciences.June 2012, Volume 101, Issue 4, pp 937-950
425	12	modified	Ying Tong et al.2012.Recognition of early Carboniferous alkaline granite in the southern Altai orogen: post-orogenic processes constrained by U–Pb zircon ages, Nd isotopes, and geochemical data.International Journal of Earth Sciences.June 2012, Volume 101, Issue 4, pp 937-950
453	5	modified	Ying Tong et al.2012.Recognition of early Carboniferous alkaline granite in the southern Altai orogen: post-orogenic processes constrained by U–Pb zircon ages, Nd isotopes, and geochemical data.International Journal of Earth Sciences.June 2012, Volume 101, Issue 4, pp 937-950
458	3	modified	Ying Tong et al.2012.Recognition of early Carboniferous alkaline granite in the southern Altai orogen: post-orogenic processes constrained by U–Pb zircon ages, Nd isotopes, and geochemical data.International Journal of Earth Sciences.June 2012, Volume 101, Issue 4, pp 937-950
462	10	modified	Ying Tong et al.2012.Recognition of early Carboniferous alkaline granite in the southern Altai orogen: post-orogenic processes constrained by U–Pb zircon ages, Nd isotopes, and geochemical data.International Journal of Earth Sciences.June 2012, Volume 101, Issue 4, pp 937-950
463	4	modified	Ying Tong et al.2012.Recognition of early Carboniferous alkaline granite in the southern Altai orogen: post-orogenic processes constrained by U–Pb zircon ages, Nd isotopes, and geochemical data.International Journal of Earth Sciences.June 2012, Volume 101, Issue 4, pp 937-950
466	3	modified	Ying Tong et al.2012.Recognition of early Carboniferous alkaline granite in the southern Altai orogen: post-orogenic processes constrained by U–Pb zircon ages, Nd isotopes, and geochemical data.International Journal of Earth Sciences.June 2012, Volume 101, Issue 4, pp 937-950
505	2	modified	Ying Tong et al.2012.Recognition of early Carboniferous alkaline granite in the southern Altai orogen: post-orogenic processes constrained by U–Pb zircon ages, Nd isotopes, and geochemical data.International Journal of Earth Sciences.June 2012, Volume 101, Issue 4, pp 937-950
399	4	SHRIMP	Ying Wang, et al. 2012 SHRIMP dating of the Qiqijianake ophiolitic mélange in the Kokshai region, southwestern Tianshan and its tectonic implications. Acta Petrologica Sinica. 28(4):1273-1281.
316	2.5	Q-ICP-MS	Yongfeng Zhu et al.2009.Petrology, Sr–Nd–Hf isotopic geochemistry and zircon chronology of the Late Palaeozoic volcanic rocks in the southwestern Tianshan Mountains, Xinjiang, NW China.Journal of the Geological Society, London, Vol. 166, 2009, pp. 1085–1099
324	4.9	Q-ICP-MS	Yongfeng Zhu et al.2009.Petrology, Sr–Nd–Hf isotopic geochemistry and zircon chronology of the Late Palaeozoic volcanic rocks in the southwestern Tianshan Mountains, Xinjiang, NW China.Journal of the Geological Society, London, Vol. 166, 2009, pp. 1085–1099
352.2	3.2	Q-ICP-MS	Yongfeng Zhu et al.2009.Petrology, Sr–Nd–Hf isotopic geochemistry and zircon chronology of the Late Palaeozoic volcanic rocks in the southwestern Tianshan Mountains, Xinjiang, NW China.Journal of the Geological Society, London, Vol. 166, 2009, pp. 1085–1099
355.3	2.4	Q-ICP-MS	Yongfeng Zhu et al.2009.Petrology, Sr–Nd–Hf isotopic geochemistry and zircon chronology of the Late Palaeozoic volcanic rocks in the southwestern Tianshan Mountains, Xinjiang, NW China.Journal of the Geological Society, London, Vol. 166, 2009, pp. 1085–1099
358.2	3.7	Q-ICP-MS	Yongfeng Zhu et al.2009.Petrology, Sr–Nd–Hf isotopic geochemistry and zircon chronology of the Late Palaeozoic volcanic rocks in the southwestern Tianshan Mountains, Xinjiang, NW China.Journal of the Geological Society, London, Vol. 166, 2009, pp. 1085–1099
361.3	5.9	Q-ICP-MS	Yongfeng Zhu et al.2009.Petrology, Sr–Nd–Hf isotopic geochemistry and zircon chronology of the Late Palaeozoic volcanic rocks in the southwestern Tianshan Mountains, Xinjiang, NW China.Journal of the Geological Society, London, Vol. 166, 2009, pp. 1085–1099
752.3	5.1	SHRIMP	Yongfeng Zhu, et al. 2012. The zircon U-Pb age for the Neoproterozoic-Ordovician granites in the Kesang Rongdong region, southwestern Tianshan Mts., Xinjiang. ACTA PETROLOGICA SINICA, 28 (7): 2113 -2120.
419.5	5.7	SHRIMP	Yongfeng Zhu, et al. 2012. The zircon U-Pb age for the Neoproterozoic-Ordovician granites in the Kesang Rongdong region, southwestern Tianshan Mts., Xinjiang. ACTA PETROLOGICA SINICA, 28 (7): 2113-2120.
401.8	1.5	LA-ICP-MS	Yongguan Dong. 2012. LA-ICP-MS zircon U-Pb age of Keketale granite body in Altay metallogenic belt, Xinjiang, and its geological implications.Resources Survey & Environment.2012(1):16-21.
152	3	SHRIMP	Yongqing Liu et al. 2006. U-Pb zircon age for the Daohugou Biota at Ningcheng of Inner Mongolia and comments on related issues.Chinese Science Bulletin.November 2006, Volume 51, Issue 21, pp 2634-2644
157	3	SHRIMP	Yongqing Liu et al. 2006. U-Pb zircon age for the Daohugou Biota at Ningcheng of Inner Mongolia and comments on related issues.Chinese Science Bulletin.November 2006, Volume 51, Issue 21, pp 2634-2644
162	2	SHRIMP	Yongqing Liu et al. 2006. U-Pb zircon age for the Daohugou Biota at Ningcheng of Inner Mongolia and comments on related issues.Chinese Science Bulletin.November 2006, Volume 51, Issue 21, pp 2634-2644
164	4	SHRIMP	Yongqing Liu et al. 2006. U-Pb zircon age for the Daohugou Biota at Ningcheng of Inner Mongolia and comments on related issues.Chinese Science Bulletin.November 2006, Volume 51, Issue 21, pp 2634-2644
290.9	8.9	LA-ICP-MS	Yue zhang et al. 2011. Geological characteristics and LA-ICP-MS zircon U-Pb age of Mayinebo ophiolite in Altay orogenic belt.Geological Bulletin of China.31(6):835-842.
393.5	4.5	LA-ICP-MS	Yue zhang et al. 2011. Geological characteristics and LA-ICP-MS zircon U-Pb age of Mayinebo ophiolite in Altay orogenic belt.Geological Bulletin of China.31(6):835-842.
437	12	LA-ICP-MS	Yue zhang et al. 2011. Geological characteristics and LA-ICP-MS zircon U-Pb age of Mayinebo ophiolite in Altay orogenic belt.Geological Bulletin of China.31(6):835-842.
389.3	5.7	SHRIMP	Yuechen Li et al.2012. Zircon U-Pb Dating and Geological Significance of Granodiorite in Tiemulik,Altay, Xinjiang.Xinjiang Geology.30(3):268-271
361	11	SHRIMP	Yuruo Shi et al.SHRIMP zircon U-Pb dating of the Gangou granitoids, Central Tianshan Mountains, Northwest China and tectonic significances.Chinese Science Bulletin.June 2007, Volume 52, Issue 11, pp 1507-1516
368	10	SHRIMP	Yuruo Shi et al.SHRIMP zircon U-Pb dating of the Gangou granitoids, Central Tianshan Mountains, Northwest China and tectonic significances.Chinese Science Bulletin.June 2007, Volume 52, Issue 11, pp 1507-1516
368	9	SHRIMP	Yuruo Shi et al.SHRIMP zircon U-Pb dating of the Gangou granitoids, Central Tianshan Mountains, Northwest China and tectonic significances.Chinese Science Bulletin.June 2007, Volume 52, Issue 11, pp 1507-1516
428	10	SHRIMP	Yuruo Shi et al.SHRIMP zircon U-Pb dating of the Gangou granitoids, Central Tianshan Mountains, Northwest China and tectonic significances.Chinese Science Bulletin.June 2007, Volume 52, Issue 11, pp 1507-1516
301.3	0.8	LA-ICP-MS	ZHANG Zuoheng et al. 2012.Geological Characteristics and Zircon U-Pb Dating of Volcanic Rocks from the Beizhan Iron Deposit in Western Tianshan Mountains, Xinjiang, NW China.Acta Geologica Sinica - English Edition.Volume 86, Issue 3, pages 737–747
303.7	0.9	LA-ICP-MS	ZHANG Zuoheng et al. 2012.Geological Characteristics and Zircon U-Pb Dating of Volcanic Rocks from the Beizhan Iron Deposit in Western Tianshan Mountains, Xinjiang, NW China.Acta Geologica Sinica - English Edition.Volume 86, Issue 3, pages 737–747
354	16	SHRIMP	Zhaojie Guo et al.2007. The discovery of Paleozoic leucogranite in eastern segment of Chinese Middle Tianshan and its tectonic implications.ACTA PETROLOGICA SINICA.23(8)
212	3	Ar-Ar	Zhenhua Zhao, et al.2003. 40Ar / 39Ar chronological study of Late Paleozoic Volcanic-hypabyssal igneous rocks in western Tianshan, Xinjiang. Geochimica, 32(4): 317-327.
256	4	Ar-Ar	Zhenhua Zhao, et al.2003. 40Ar / 39Ar chronological study of Late Paleozoic Volcanic-hypabyssal igneous rocks in western Tianshan, Xinjiang. Geochimica, 32(4): 317-327.
261	4	Ar-Ar	Zhenhua Zhao, et al.2003. 40Ar / 39Ar chronological study of Late Paleozoic Volcanic-hypabyssal igneous rocks in western Tianshan, Xinjiang. Geochimica, 32(4): 317-327.
268	4	Ar-Ar	Zhenhua Zhao, et al.2003. 40Ar / 39Ar chronological study of Late Paleozoic Volcanic-hypabyssal igneous rocks in western Tianshan, Xinjiang. Geochimica, 32(4): 317-327.
270	4	Ar-Ar	Zhenhua Zhao, et al.2003. 40Ar / 39Ar chronological study of Late Paleozoic Volcanic-hypabyssal igneous rocks in western Tianshan, Xinjiang. Geochimica, 32(4): 317-327.
272	4	Ar-Ar	Zhenhua Zhao, et al.2003. 40Ar / 39Ar chronological study of Late Paleozoic Volcanic-hypabyssal igneous rocks in western Tianshan, Xinjiang. Geochimica, 32(4): 317-327.
284	5	Ar-Ar	Zhenhua Zhao, et al.2003. 40Ar / 39Ar chronological study of Late Paleozoic Volcanic-hypabyssal igneous rocks in western Tianshan, Xinjiang. Geochimica, 32(4): 317-327.
288	5	Ar-Ar	Zhenhua Zhao, et al.2003. 40Ar / 39Ar chronological study of Late Paleozoic Volcanic-hypabyssal igneous rocks in western Tianshan, Xinjiang. Geochimica, 32(4): 317-327.
313	5	Ar-Ar	Zhenhua Zhao, et al.2003. 40Ar / 39Ar chronological study of Late Paleozoic Volcanic-hypabyssal igneous rocks in western Tianshan, Xinjiang. Geochimica, 32(4): 317-327.
319	5	Ar-Ar	Zhenhua Zhao, et al.2003. 40Ar / 39Ar chronological study of Late Paleozoic Volcanic-hypabyssal igneous rocks in western Tianshan, Xinjiang. Geochimica, 32(4): 317-327.
330	5	Ar-Ar	Zhenhua Zhao, et al.2003. 40Ar / 39Ar chronological study of Late Paleozoic Volcanic-hypabyssal igneous rocks in western Tianshan, Xinjiang. Geochimica, 32(4): 317-327.
241.8	1.3	Ar-Ar	Zhihui Cai, et al. 2012. Age and tectonic evolution of ductile shear zones in the eastern Tianshan-Beishan orogenic belt. Acta Petrologica Sinica, 28(6):1875-1895.
277.3	1.2	LA-ICP-MS	Zhihui Cai, et al. 2012. Age and tectonic evolution of ductile shear zones in the eastern Tianshan-Beishan orogenic belt. Acta Petrologica Sinica, 28(6):1875-1895.
280.2	3.7	Ar-Ar	Zhihui Cai, et al. 2012. Age and tectonic evolution of ductile shear zones in the eastern Tianshan-Beishan orogenic belt. Acta Petrologica Sinica, 28(6):1875-1895.
290	2.4	Ar-Ar	Zhihui Cai, et al. 2012. Age and tectonic evolution of ductile shear zones in the eastern Tianshan-Beishan orogenic belt. Acta Petrologica Sinica, 28(6):1875-1895.
290	11	Ar-Ar	Zhihui Cai, et al. 2012. Age and tectonic evolution of ductile shear zones in the eastern Tianshan-Beishan orogenic belt. Acta Petrologica Sinica, 28(6):1875-1895.
292.4	2.6	Ar-Ar	Zhihui Cai, et al. 2012. Age and tectonic evolution of ductile shear zones in the eastern Tianshan-Beishan orogenic belt. Acta Petrologica Sinica, 28(6):1875-1895.
367.6	3.2	Ar-Ar	Zhihui Cai, et al. 2012. Age and tectonic evolution of ductile shear zones in the eastern Tianshan-Beishan orogenic belt. Acta Petrologica Sinica, 28(6):1875-1895.
342.5	2.3	SIMS	ZhiMin Zhu, et al. 2012. Geochemistry and geodynamics of intermediate-acid igneous rocks in northern Tekesi，Western Tianshan Mountains． Acta Petrologica Sinica，28( 7) : 2145 － 2157.
366	8	SHRIMP	ZhiXin Zhu, et al. 2006. Zircon SHRIMP dating of Silurian and Devonian granitic intrusions in the southern Yili block, Xinjiang and preliminary discussion on their tectonic setting. Acta Petrologica Sinica, 22(5):1193-1200.
370	7	SHRIMP	ZhiXin Zhu, et al. 2006. Zircon SHRIMP dating of Silurian and Devonian granitic intrusions in the southern Yili block, Xinjiang and preliminary discussion on their tectonic setting. Acta Petrologica Sinica, 22(5):1193-1200.
436	8	SHRIMP	ZhiXin Zhu, et al. 2006. Zircon SHRIMP dating of Silurian and Devonian granitic intrusions in the southern Yili block, Xinjiang and preliminary discussion on their tectonic setting. Acta Petrologica Sinica, 22(5):1193-1200.
418.2	2.6	LA-ICP-MS	Zhongping Ma et al.2007. Dating for zircons of gabbro from Kulehu ophiolite,southern Tianshan, and its geological implication.JOURNAL OF NORTHWEST UNIVERSITY(NATURAL SCIENCE EDITION).37(1):107-110
300.3	1.1	LA-ICP-MS	Zongsheng Jiang et al.2012. Geochemistry and zircon U-Pb age of volcanic rocks from the Chagangnuoer and Zhibo iron deposits, western Tianshan, and their geological significance.28(7): 2074-2088
301.8	0.9	LA-ICP-MS	Zongsheng Jiang et al.2012. Geochemistry and zircon U-Pb age of volcanic rocks from the Chagangnuoer and Zhibo iron deposits, western Tianshan, and their geological significance.28(7): 2074-2088
303.8	1.3	LA-ICP-MS	Zongsheng Jiang et al.2012. Geochemistry and zircon U-Pb age of volcanic rocks from the Chagangnuoer and Zhibo iron deposits, western Tianshan, and their geological significance.28(7): 2074-2088
305	1.1	LA-ICP-MS	Zongsheng Jiang et al.2012. Geochemistry and zircon U-Pb age of volcanic rocks from the Chagangnuoer and Zhibo iron deposits, western Tianshan, and their geological significance.28(7): 2074-2088
434.4	6.2	SHRIMP	Zuoheng Zhang et al. 2007. SHRIMP zircon U-Pb dating of diorite from Qingbulake basic complex in western Tianshan Mountains of Xinjiang and its geological significance.MINERAL DEPOSITS.26(4):353-360
301.3	0.8	LA-ICP-MS	Zuoheng Zhang et al. 2012. Geological Characteristics and Zircon U-Pb Dating of Volcanic Rocks from the Beizhan Iron Deposit in Western Tianshan Mountains, Xinjiang, NW China.Acta Geologica Sinica - English Edition.Volume 86, Issue 3, pages 737–747
303.7	0.9	LA-ICP-MS	Zuoheng Zhang et al. 2012. Geological Characteristics and Zircon U-Pb Dating of Volcanic Rocks from the Beizhan Iron Deposit in Western Tianshan Mountains, Xinjiang, NW China.Acta Geologica Sinica - English Edition.Volume 86, Issue 3, pages 737–747
